1 **Downregulation of *WT1* transcription factor gene expression is required to promote**  
2 **myocardial fate**

3 Ines J. Marques<sup>1\*</sup>, Alexander Ernst<sup>1&</sup>, Prateek Arora<sup>1&</sup>, Andrej Vianin<sup>1</sup>, Tanja Hetke<sup>1</sup>,  
4 Andrés Sanz-Morejón<sup>1,2,3</sup>, Uta Naumann<sup>4</sup>, Adolfo Odriozola<sup>5</sup>, Xavier Langa<sup>1</sup>, Laura Andrés-  
5 Delgado<sup>2,6</sup>, David Haberthür<sup>7</sup>, Benoît Zuber<sup>5</sup>, Carlos Torroja<sup>2</sup>, Ruslan Hlushchuk<sup>7</sup>, Marco  
6 Osterwalder<sup>8</sup>, Filipa Simões<sup>9</sup>, Christoph Englert<sup>4,10</sup>, Nadia Mercader<sup>1,2\*</sup>

7

8 1 Department of Developmental Biology and Regeneration, Institute of Anatomy, University of  
9 Bern, Switzerland

10 2 Centro Nacional de Investigaciones Cardiovasculares CNIC, Madrid, Spain

11 3 Current address: Molecular Neurobiology, German Cancer Research Center (DKFZ),  
12 Heidelberg, Germany

13 4 Leibniz Institute on Aging-Fritz Lipmann Institute, Jena, Germany

14 5 Department of Microscopic Anatomy and Structural Biology, Institute of Anatomy, University  
15 of Bern, Switzerland

16 6 Current address: Department of Anatomy, Histology and Neuroscience, School of Medicine,  
17 Autónoma University of Madrid, Madrid, Spain

18 7 microCT group, Institute of Anatomy, University of Bern, Switzerland

19 8 Department of BioMedical Research (DBMR), University of Bern, Switzerland

20 9 Department of Physiology, Anatomy and Genetics, Oxford University, UK

21 10 Institute of Biochemistry and Biophysics, Friedrich-Schiller-University Jena, Jena, Germany

22 & These authors contributed equally to this work

23 \*corresponding author: [ines.marques@ana.unibe.ch](mailto:ines.marques@ana.unibe.ch); [nadia.mercader@ana.unibe.ch](mailto:nadia.mercader@ana.unibe.ch)

24

25 **ABSTRACT**

26 During cardiac development, cells from the precardiac mesoderm fuse to form the primordial  
27 heart tube, which then grows by addition of further progenitors to the venous and arterial poles.  
28 In the zebrafish, *wilms tumor 1 transcription factor a* (*wt1a*) and *b* (*wt1b*) are expressed in the  
29 pericardial mesoderm at the venous pole of the forming heart tube. The pericardial mesoderm  
30 forms a single layered mesothelial sheet that contributes to further the growth of the  
31 myocardium, and forms the proepicardium. Proepicardial cells are subsequently transferred to  
32 the myocardial surface and give rise to the epicardium, the outer layer covering the  
33 myocardium in the adult heart. *wt1a/b* expression is downregulated during the transition from  
34 pericardium to myocardium, but remains high in proepicardial cells. Here we show that  
35 sustained *wt1* expression impaired cardiomyocyte maturation including sarcomere assembly,  
36 ultimately affecting heart morphology and cardiac function. ATAC-seq data analysis of  
37 cardiomyocytes overexpressing *wt1* revealed that chromatin regions associated with  
38 myocardial differentiation genes remain closed upon *wt1b* overexpression in cardiomyocytes,  
39 suggesting that *wt1* represses a myocardial differentiation program. Indeed, a subset of  
40 *wt1a/b*-expressing cardiomyocytes changed their cell adhesion properties, delaminated from  
41 the myocardial epithelium, and upregulated the expression of epicardial genes, as confirmed  
42 by *in vivo* imaging. Thus, we conclude that *wt1* acts as a break for cardiomyocyte differentiation  
43 by repressing chromatin opening at specific genomic loci and that sustained ectopic  
44 expression of *wt1* in cardiomyocytes can lead to their transformation into epicardial cells.

45

46 **KEYWORDS**

47 *wt1a*, *wt1b*, heart development, cardiomyocyte, epicardium, zebrafish, cell fate

48

49 **INTRODUCTION**

50 The heart is one of the first organs to acquire its function and it starts beating long before  
51 cardiac development is completed. In mammals, its function is essential to promote blood flow

52 in order to sustain oxygenation and nutrition of the organism. Indeed, heart defects are among  
53 the major congenital anomalies responsible for neonatal mortality (1, 2).

54 The zebrafish is a well-established vertebrate model organism in cardiovascular research  
55 given its transparency during early developmental stages and rapid embryonic development  
56 (3). Cardiac precursor cells derive from the anterior lateral plate mesoderm (4). At 14 hours  
57 postfertilization (hpf), cardiac precursor cells start to express *myosin light chain 7 (myl7)* (5)  
58 and sarcomere assembly begins soon after (6, 7). As the assembly of sarcomeres continues,  
59 the cardiac precursor cells migrate and fuse into a cone that later forms the heart tube, which  
60 is contractile at 24 hpf and is comprised of a monolayer of cardiomyocytes lined in the interior  
61 with an endocardial layer facing the lumen. Next, the heart tube starts to loop, leading to the  
62 formation of the two chambers, the atrium and the ventricle (4). Concomitantly, more  
63 progenitors enter the heart tube through the arterial and venous poles (8). Around 55 hpf, the  
64 outermost cell layer of the heart, the epicardium, starts to form. Epicardial cells arise from the  
65 proepicardium, a cell cluster derived from the dorsal pericardium that lies close to the venous  
66 pole of the heart. Cells from this cluster are later released into the pericardial cavity and attach  
67 to the myocardial surface, forming the epicardium (9, 10).

68 *Wilms tumor 1 (WT1)* is one of the main epicardial and proepicardial marker genes and plays  
69 a central role in epicardium morphogenesis (10, 11). *Wt1* contains 4 DNA binding zinc-finger  
70 domains in the C-terminus and has been shown to act as a transcription factor (12). *Wt1* is  
71 expressed in the epicardium during embryonic development and, in the adult heart, is  
72 reactivated after cardiac injury (13).

73 The zebrafish has two *Wt1* orthologues, *wt1a* and *wt1b* (14). These genes are also expressed  
74 in the proepicardium and epicardium (9, 15) in partially overlapping expression domains. Using  
75 transgenic reporter and enhancer trap lines (16, 17), we previously showed that *wt1a* and *wt1b*  
76 are initially expressed in a few proepicardial cells and later in epicardial cells (18, 19). While  
77 *wt1a* and *wt1b* mRNA expression was not detected in the myocardium, *wt1b:eGFP* signal was  
78 transiently detected in cardiomyocytes of the atrium close to the inflow tract of the heart.  
79 Furthermore, some *wt1a-associated* regulatory regions were found to drive eGFP expression

80 in cardiomyocytes (18). Given that *wt1b* and *wt1a* regulatory elements drive gene expression  
81 in the myocardium but endogenous mRNA expression is observed only in the proepicardium  
82 and epicardium we hypothesized that *wt1* expression in the myocardium needs to be actively  
83 repressed to enable progression of normal heart development needs to be repressed in the  
84 myocardium for correct heart development.

85 To explore whether there is a requirement for *Wt1* downregulation in the myocardium for proper  
86 embryonic development, we generated transgenic zebrafish models for tissue specific  
87 overexpression of *wt1b* or *wt1a* in cardiomyocytes. We found that sustained *wt1a* or *wt1b*  
88 overexpression in the myocardium induced the delamination and a phenotypic change from  
89 cardiomyocytes to epicardial-like cells. Moreover, we observed impaired cardiac  
90 morphogenesis, altered sarcomere assembly and delayed myocardial differentiation, which  
91 ultimately led to alterations in cardiac function, atrial hypertrophy and fibrosis.

92 ATAC-seq data analysis of cardiomyocytes overexpressing *wt1* revealed that this regulator  
93 acts as a brake for cardiomyocyte differentiation by reducing chromatin accessibility of  
94 genomic loci associated with key processes like sarcomere assembly, establishment of  
95 apicobasal polarity and adherens junctions formation.

96 Altogether, our results demonstrate that transcriptional downregulation of *wt1a/b* expression  
97 in cardiomyocytes is a prerequisite for cardiomyocyte specification ensuring correct  
98 development of the heart and preventing a phenotypic switch of cardiomyocytes into epicardial  
99 cells.

100

## 101 **RESULTS**

### 102 ***Wt1* is downregulated in cardiac progenitors upon their entry into the heart tube**

103 During heart tube growth, cells from the pericardial mesoderm enter the heart tube at the  
104 venous pole (8). These cells can be labelled with the line *epi:eGFP* (9), an enhancer trap line  
105 of *wt1a* (Fig 1A). We found that during this process, cardiomyocyte precursors downregulate  
106 eGFP expression concomitant with the activation of *myl7:mRFP* (Fig 1B and S1 Video). We  
107 measured the eGFP/mRFP signal intensity ratio in cells of the hearts tube, from the sinus

108 venosus (SV) towards the growing heart tube. We found that the further away the cells were  
109 from the SV, the lower was the eGFP/mRFP ratio (Fig 1C, n=3). To further confirm these  
110 observations, we performed SMARTer RNA-seq of cells collected from three distinct regions:  
111 pericardium, proepicardium and heart tube at 60 hpf (Fig 1D-F). We detected a gradual  
112 decrease in *wt1a* and *wt1b* normalized counts among these three tissues, with the highest  
113 counts in PE cells and lowest in cells from the heart tube. The opposite trend was observed  
114 for *myl7* expression, being highest in heart tube and lowest in the proepicardium samples.

115

116 **Fig 1. *wt1a* positive cells lose eGFP expression upon entering the heart tube.**

117 (A) Schematic representation of the *in vivo* imaging of the developing heart tube.

118 (B) Time-lapse images of the developing heart tube between 52 and 68 hours post fertilization  
119 in the double transgenic line *epi:eGFP;myl7:mRFP*. Grey images are single channel zoomed  
120 images from the boxes in the merged panels. There is an opposite gradual shift in the  
121 expression levels between eGFP and RFP along the time.

122 (C) Quantification of the ratio of eGFP and mRFP levels in cells of the heart tube according to  
123 the distance to the sinus venosus (SV).

124 (D) Schematic representation of tissue dissection for SMARTer-seq of pericardium,  
125 proepicardium and heart tubes of zebrafish embryos.

126 (E-E') Volcano plots. Magenta dots indicate upregulated genes in the heart tube. Green dots  
127 mark genes upregulated in proepicardium (E) or pericardium (E').

128 (F) Quantification of normalized counts for the epicardial marker genes *wt1a* and *wt1b*, and  
129 the myocardial gene *myl7*.

130 (G) Schematic representation of the downregulation of eGFP and upregulation of mRFP in  
131 cardiomyocyte progenitors upon their entry into the heart tube.

132 Scale bars: 50  $\mu$ m. dp, dorsal pericardium; ht, heart tube; sv, sinus venosus.

133

134 We next assessed if the observed downregulation of *Wt1* during cardiomyocyte differentiation  
135 from a pool of cardiac precursor cells could be a conserved mechanism during vertebrate heart

136 development and whether this downregulation might be associated with directed repression of  
137 *Wt1* gene expression. For this, we inspected previously published data on activating and  
138 repressing Histone marks at the *Wt1* genomic locus during four stages of cardiac differentiation  
139 from mouse embryonic stem cells (mESCs) (20) (S1 Fig). Low levels of *Wt1* transcripts were  
140 visible in mESCs but absent throughout differentiation stages. Similarly, Histone 3 K27  
141 acetylation (H3K27ac) enrichment - which correlates with active promoter and enhancer  
142 activity – was present in regions proximal to the *Wt1* transcriptional start site (TSS) in mESCs  
143 and mesodermal progenitor cells. Interestingly, some of these regions also co-localized with  
144 enhancer elements known to drive epicardial-specific reporter gene expression (21).  
145 Conversely, Histone H3 K27 trimethylation (H3K27me3) signatures, which associate with  
146 repressed regions, were near-absent in mESCs, while in cardiac precursor cells and  
147 differentiated cardiomyocytes, they massively decorated the extended regions flanking the *Wt1*  
148 TSS, including the epicardial enhancer elements. Together, these observations indicate that  
149 during cardiomyocyte differentiation, *Wt1* expression and epicardial enhancers become  
150 actively repressed.

151 In summary, during heart development, cardiac precursor cells downregulate *wt1* upon their  
152 entry into the heart tube, which might be a prerequisite for their differentiation into  
153 cardiomyocytes (Fig 1G).

154

### 155 **Cardiomyocytes that overexpress *wt1* can delaminate from the heart, are depleted of** 156 **sarcomeric proteins and start expressing epicardial markers**

157 We next aimed at exploring the biological relevance for the observed downregulation of *wt1* in  
158 cardiomyocytes. Therefore, to analyze the consequence of *wt1* expression in cardiomyocytes,  
159 we generated the line *Tg(b-actin2:loxP-DsRED-loxP-eGFP-T2A-wt1a)*, to conditionally induce  
160 the expression of *wt1a*. Crossing this line into *Tg(myI7:CreERT2)* (22) allowed the temporally  
161 induced overexpression of *wt1a* in cardiomyocytes. Hereafter, the double transgenic line is  
162 called *myI7:CreERT2;eGFP-T2A-wt1a*. We administered 4-hydroxytamoxifen (4-OHT) from 24  
163 hpf to 4 days postfertilization (dpf) to induce recombination of loxP sites and activation of *wt1a*

164 and *eGFP* expression during embryogenesis in cardiomyocytes (S2 Fig). We confirmed *wt1a*  
165 and *eGFP* overexpression in the heart by RT-qPCR (S2 Fig). Comparison of *eGFP* and *wt1a*  
166 expression between *myl7:CreERT2;eGFP-T2A-wt1a* with and without 4-OHT administration  
167 revealed a 4-fold increase in *eGFP* and *wt1a* expression in the latter (S2 Fig). Moreover, we  
168 generated a line to overexpress *wt1b*. We decided to use the Gal4/UAS system in this case,  
169 to allow a more homogeneous expression in the myocardium. The line *Tg(eGFP:UAS:wt1b)*  
170 allowed overexpression of *wt1b* and *eGFP* under a bidirectional *UAS* promoter. We crossed  
171 the line into *Tg(myl7:Gal4)* (23); the double transgenic line will be hereafter called  
172 *myl7:Gal4;eGFP:UAS:wt1b* (S3 Fig). *wt1b* and *eGFP* expression in cardiomyocytes of the  
173 double transgenic line *myl7:Gal4;eGFP:UAS:wt1b* was four-fold upregulated compared to cells  
174 from the single transgenic *eGFP:UAS:wt1b* (S2 Fig). As a control, we used the double  
175 transgenic line *Tg(eGFP:UAS:RFP);(myl7:Gal4)* (24), hereafter named  
176 *myl7:Gal4;eGFP:UAS:RFP*. RT-qPCR analysis also indicated that expression of *wt1b* and  
177 *wt1a* could be monitored via GFP imaging (S2 Fig).

178 Using these new lines, we analyzed the effect of sustained *wt1a* and *wt1b* overexpression in  
179 cardiomyocytes during heart development (Fig 2A). In *wt1a*-overexpressing hearts but not in  
180 controls, we were able to observe *eGFP*-positive cardiomyocytes located at an apical position,  
181 protruding towards the pericardial cavity at 5 dpf (Fig 2B-C"). Moreover, these delaminating  
182 cardiomyocytes showed reduced expression of Myosin Heavy Chain (MHC), suggesting that  
183 they lost to some extent a myocardial phenotype (Fig 2C-C"). We quantified how many of the  
184 delaminating cells were *GFP*<sup>+</sup> or *GFP*<sup>-</sup> and found that only *GFP*<sup>+</sup> cells were delaminating,  
185 indicating that this delamination process is due to a cell-autonomous effect of *wt1a* in  
186 cardiomyocytes (S1 Table). We detected a similar occurrence in *wt1b* overexpressing hearts,  
187 starting at 3 dpf (Fig 2D-E"). Some *GFP*-positive cells delaminated towards the apical  
188 myocardial surface. Those cells were not positive for the myocardial marker MHC.

189

190 **Fig 2. Ventricular cardiomyocytes delaminate from the ventricle and change their fate**  
191 **upon *wt1b* overexpression.**

192 (A) Schematic representation of used transgenic lines and position of the embryos for imaging.  
193 (B-C'') Whole mount immunofluorescence against GFP (green) and MHC (magenta) on  
194 *myl7:CreERT2,eGFP-T2A-wt1a* hearts at 5 days post fertilization (dpf), non-recombined (B-  
195 B'') and recombined by addition of 4-OHT between 24 hours post fertilization (hpf) and 4 dpf  
196 (C-C''). Shown are maximum intensity projections of 5 optical sections with a distance of 1.5  
197  $\mu\text{m}$  between two consecutive sections. Yellow arrows point GFP positive cardiomyocytes  
198 located on the apical myocardial surface revealing reduced MHC staining.  
199 (D-E'') Whole mount immunofluorescence against GFP and MHC on a  
200 *myl7:Gal4;eGFP:UAS:RFP* (D-D'') and a *myl7:Gal4;eGFP:UAS:wt1b* (E-E'') embryo, at 3 dpf.  
201 DAPI was used for nuclear counterstain. Shown are maximum intensity projections of 20  
202 stacks with a distance of 1  $\mu\text{m}$  between two consecutive optical sections of the heart region.  
203 (D-D'') and (E-E'') are magnifications of the area of the ventricle marked by the dashed  
204 bounding boxes in D and E, respectively. Yellow arrowhead points to a GFP-positive cell that  
205 is MHC<sup>+</sup> in D-D'' and to a GFP<sup>+</sup>/MHC<sup>-</sup> cell in E-E'').  
206 (F-G) Time lapse images of the ventricle in a *myl7:Gal4; eGFP:UAS:RFP* (F) or *myl7:Gal4;*  
207 *eGFP:UAS:wt1b* (G) embryo between 2 and 3 dpf. Elapsed time since initial acquisition is  
208 stamped in each panel. Arrowhead in G point to a cell extruding from the ventricle.  
209 (H) Time lapse images of the ventricle in a *myl7:Gal4; eGFP:UAS:wt1b* embryo between 5 and  
210 6 dpf. Elapsed time since initial acquisition is stamped in each panel. Note how a delaminating  
211 cell changes morphology along time and flattens down (yellow arrowhead).  
212 (I) Model of the delamination process of *wt1b* overexpressing cardiomyocytes.  
213 Scale bar, 50  $\mu\text{m}$ . at, atrium; CM, cardiomyocyte; ht, heart tube; IF, immunofluorescence; v,  
214 ventricle  
215  
216 To better understand the origin of these apically positioned eGFP-positive cells, in the *wt1b*  
217 overexpression hearts, we performed *in vivo* imaging in *myl7:Gal4;eGFP:UAS:RFP* and  
218 *myl7:Gal4;eGFP:UAS:wt1b* between 2 and 3 dpf (Fig 2F, G and S2 Video). In  
219 *myl7:Gal4:eGFP:UAS:wt1b* hearts, some eGFP-positive cells started to round up and initiated



220 delamination from the myocardium. Cells gradually changed from a flat to a rounded shape  
221 and ultimately remained adherent to the outer myocardial layer (Fig 2G and S2 Video; n=4).  
222 This event of cell delamination was not observed in *myl7:Gal4:eGFP:UAS:RFP* control  
223 embryos (Fig 2F and S2 Video; n=2). Apical extrusion of cardiomyocytes can be a  
224 consequence of myocardial malformation during which extruded cells are eliminated (25, 26).  
225 However, here we found that the delaminated cells did remain attached to the myocardial  
226 surface. Between 5 and 6 dpf, these delaminated cells lost their rounded shape and flattened,  
227 acquiring an epicardial-like morphology (Fig 2H-I and S3 Video 3, n=4).  
228 To confirm that this type of cellular delamination with loss of MHC expression was specific of  
229 the overexpression of *wt1* we generated the *Tg(eGFP:UAS:tcf21)*, which we then crossed into  
230 the *Tg(myl7:Gal4)* (S3 Fig). This double transgenic allowed us to overexpress another well-  
231 known epicardial marker, *tcf21* (27) in cardiomyocytes. Contrary to what we observed when  
232 overexpressing *wt1a/b* in cardiomyocytes (S3 Fig), in the large majority of these embryos  
233 (59/62) we did not observe apical delamination in the hearts of the  
234 *myl7:Gal4;eGFP:UAS:tcf21* fish. In the very few cases where delamination occurred (3/62),  
235 the protruding cells still expressed MHC (S3 Fig).  
236 Due to the position and change of morphology of delaminated cells we hypothesized, these  
237 cells had undergone a change of fate. For a better characterization of a possible switch to an  
238 epicardial fate we performed immunofluorescence labeling with the epicardial markers  
239 Aldehyde dehydrogenase 2 (*Aldh1a2*) (28, 29) and Caveolin 1 (*Cav1*) (30) (Fig 3A). We  
240 detected GFP/*Aldh1a2* double positive cells in *wt1b* overexpression hearts (n=3) but not in  
241 controls (n=4) (Fig 3B-C'''). Similarly, whereas in control hearts (n=6) we could not observe  
242 GFP/*Cav1* double positive cells (Fig 3D-D'''), in *wt1b*-overexpressing hearts (n=4), we  
243 identified GFP positive cells that also expressed Caveolin 1 (Fig 3E-E'''). We also detected  
244 eGFP<sup>+</sup> cells within the epicardium of *wt1a* overexpressing hearts, but not in controls (Fig 3F-  
245 G, H-H', I-J', K-K', L-M', N-N', O-P' and Q-Q'). These eGFP<sup>+</sup> cells did not express MHC (Fig  
246 3J'', K'', P'' and Q''), and were *Aldh1a2*-positive (Fig 3J''' and L''') as well as Caveolin 1 positive  
247 (Fig 3P''' and Q''') strongly suggesting that *wt1a* overexpressing cardiomyocytes switched their

248 fate to epicardial cells. We tested for the colocalization of *wt1a*-expression in cardiomyocytes  
249 with a third epicardial marker, *transglutaminase b (tgm2b)* (31). We performed *in situ*  
250 hybridization against *tgm2b* mRNA followed by immunohistochemistry against eGFP (S4 Fig).  
251 In non-recombined *myl7:CreERT2; eGFP-T2A-wt1a* hearts, *tgm2b* expression was only visible  
252 in few epicardial cells in ventricle and we could not observe any co-localization with eGFP  
253 expressing cells (S4 Fig). However, in embryonically recombined *myl7:CreERT2; eGFP-T2A-*  
254 *wt1a* hearts, we could observe cells co-expressing *tgm2b* and eGFP located within the  
255 epicardium (S4 Fig).

256

257 **Fig 3. Delaminated *wt1* overexpressing in cardiomyocytes start to express epicardial**  
258 **markers.**

259 (A) Schematic representation of the lines used and the time points during which 4-  
260 hydroxytamoxifen (4-OHT) was administered to *myl7:CreERT2;β-actin:loxP-DsRed-loxP-*  
261 *eGFP-T2A-wt1a* fish (in short *myl7:CreERT2,eGFP-T2A-wt1a*), as well as embryo orientation  
262 for image acquisition.

263 (B-C''') Whole mount immunofluorescence against GFP and *Aldh1a2* in a  
264 *myl7:Gal4;eGFP:UAS:RFP* (B-B''') and *myl7:Gal4;eGFP:UAS:wt1b* (C-C''') embryo, at 5 dpf.  
265 Shown are maximum intensity projections of 5 images with a distance of 1 μm between two  
266 consecutive optical sections. (B'-B''') Zoomed view of the boxed area in B. (C'-C''') Zoomed  
267 view of the boxed area in C. White arrow, epicardial cells positive for *Aldh1a2* and negative for  
268 GFP. Yellow arrows, epicardial cells that express both *Aldh1a2* and GFP. Green, GFP;  
269 magenta, *Aldh1a2*; blue, DAPI.

270 (D-E''') Whole mount immunofluorescence against GFP and Caveolin 1 (*Cav1*) in a  
271 *myl7:Gal4;eGFP:UAS:RFP* (D-D''') and *myl7:Gal4;eGFP:UAS:wt1b* (E-E''') embryo, at 6 dpf.  
272 Shown are maximum intensity projections of 10 consecutive optical section with a distance of  
273 1.5 μm between them. (D'-D''') Zoomed view of the boxed area in D. (E'-E''') Zoomed view of  
274 the boxed area in E. White arrows, epicardial cells positive for *Cav1* and negative for GFP.

275 Yellow arrows, epicardial cells that express both Cav1 and GFP. Green, GFP; magenta, Cav1;  
276 blue, DAPI.

277 (F-K'') Immunofluorescence against GFP (green), MHC (white) and Aldh1a2 (magenta) on  
278 paraffin sections of (F-H'') *myl7:CreERT2;eGFP-T2A-wt1a* and (I- K'') *myl7:CreERT2;eGFP-*  
279 *T2A-wt1a* + 4-OHT adult hearts. Shown are sections of the heart (F and I), as well as zoomed  
280 views of indicated regions (G-G'', H-H'', J-J'' and K-K''). Both, merged and single channels  
281 are shown, as indicated in the panel. White arrowheads, cells positive for Aldh1a2 only. Yellow  
282 arrowheads point to cells positive for GFP and Aldh1a2 signal that lack MHC staining, and  
283 which are located close to the myocardial surface.

284 (L-Q'') Immunofluorescence against GFP (green), MHC (white) and Caveolin 1 (Cav1)  
285 (magenta) on paraffin sections of (L-N'') *myl7:CreERT2;eGFP-T2A-wt1a* and (O-Q'')  
286 *myl7::CreERT2;eGFP-T2A-wt1a* + 4-OHT adult hearts. Shown are sections of the heart (L and  
287 O), as well as zoomed views of indicated regions (M-N'' and P-Q''). Both, merged and single  
288 channels are shown, as indicated in the panel. White arrowheads point to cells positive only  
289 for Cav1. Yellow arrowheads point to cells positive for GFP and Cav1 signal that lack MHC  
290 staining, and which are located close to the myocardial surface.

291 Scale bars: 500  $\mu\text{m}$  (F, I, L, O) 50  $\mu\text{m}$  (B, C, D, E, G, H, J, K, M, N, P, Q) and 10  $\mu\text{m}$  (B'-B'',  
292 C'-C'', D'-D'' and E'-E''). at, atrium; Cav1, Caveolin1; MHC, Myosin Heavy Chain; v, ventricle.

293

294 These results suggest that upon sustained ectopic overexpression of *wt1a/b*, cardiomyocytes  
295 can delaminate apically from the myocardial layer and adopt features of epicardial cells that  
296 contribute to the formation of the epicardial layer even in the adult heart.

297

298 ***wt1b* overexpression disrupts cell-cell contacts and the basement membrane of the**  
299 **cardiomyocytes**

300 We decided to get a better understanding on the cellular mechanisms underlying  
301 cardiomyocyte apical delamination of cardiomyocyte upon *wt1* expression (Fig 4A). Previous  
302 reports showed that correct development and morphogenesis of the heart requires cell-cell

303 adhesion and polarization of the cardiomyocytes (32). The proper localization of tight junctions  
304 and adherens junctions has conventionally been used to assess the polarization of the cells  
305 (33). We first performed immunostainings against ZO-1, a component of tight junctions (34)  
306 (Fig 4B-E'). Whereas the *myl7:Gal4:eGFP:UAS:RFP* control hearts (n=6) showed discrete  
307 apical localization of ZO-1 (Fig 4B-C'), in *myl7:Gal4:eGFP:UAS:wt1b* hearts (n=8) ZO-1 levels  
308 were reduced, the signal was diffuse and not clearly localized to apical junctions between  
309 cardiomyocytes (Fig 4D-E'). This suggests defects in the formation and localization of tight  
310 junctions upon *wt1b* overexpression. To evaluate the formation of adherens junctions, we  
311 crossed the *Tg(myl7:cdh2-tdTomato)<sup>bns78</sup>* line (35) with *myl7:Gal4:eGFP:UAS:wt1b*. This  
312 allowed us to specifically visualize subcellular localization of *cdh2-tdTomato* in *wt1b*-  
313 overexpressing cardiomyocytes and control siblings (Fig 4A and F-M'). At 5 dpf, in control  
314 embryos (n=6), *tdTomato* signal was clearly localized to cell-cell junctions (Fig 4F-G) and  
315 detected apically in cardiomyocytes (Fig 4H-I'). In contrast, *myl7:cdh2-*  
316 *tdTomato;myl7:Gal4:eGFP:UAS:wt1b* hearts (n=8), showed a diffused and patchy staining for  
317 *cdh2-tdTomato*, which was not restricted to the apical side of the cardiomyocytes (Fig 4J-J''  
318 and L-M'). Moreover, we observed loss of *cdh2-tdTomato* signal in the delaminating cells  
319 further indicating a loss of polarity in these extruding cells (Fig 4K-K''). To confirm the  
320 impairment in the formation of adherens junctions we did an immunostaining against  $\beta$ -  
321 catenin, a core component of adherens junctions (36). Similar to what we had observed for  
322 *cdh2-td-Tomato*,  $\beta$ -catenin staining was located at the apical side of cardiomyocytes in  
323 *myl7:Gal4:eGFP:UAS:RFP* control hearts (n=5) (Fig 4N-O'). However, in *wt1b*-overexpressing  
324 hearts (n=5)  $\beta$ -catenin staining was no longer detected (Fig 4P-Q'). Taken together, this data  
325 shows that sustained expression of *wt1b* in cardiomyocytes leads to the mislocalization of tight  
326 junctions and adherens junctions, indicating an impairment of the apical domain in  
327 cardiomyocytes.

328

329 **Fig 4. Expression of cell junction and polarity markers in *wt1b*-overexpressing hearts.**

330 (A) Schematic representation of the lines used and embryo orientation for imaging.

331 (B-E') Immunofluorescence against zonula occludens 1 (ZO-1) and myosin heavy chain (MHC)  
332 in 5 days post fertilization (dpf) *myl7:Gal4;eGFP:UAS:RFP* (B-C') and  
333 *myl7:Gal4;eGFP:UAS:wt1b* (D-E') embryos. Shown are sagittal single planes of the ventricle.  
334 Single channels (B', C', D' and E') show ZO1 signal. (C-C') Zoomed views of the box in B'.  
335 White arrows point to ZO1 signal. (E-E') Zoomed views of the box in D'. Yellow arrows point  
336 to ZO1 signal.

337 (F-M') Immunofluorescence against tdTomato (tdT) (using a DsRed antibody) and MHC in 5  
338 dpf *myl7:cdh2-tdTomato* (F-I') and *myl7:cdh2-tdTomato;myl7:Gal4;eGFP:UAS:wt1b* (J-M')  
339 embryos. (F-G) 3D projections of a heart. (G) Zoomed view of the box region in F'. (H-I')  
340 Sagittal single planes of the ventricle. (I-I') Zoomed view of the box in H'. White arrows point  
341 to regions with tdT signal. (J-K'') 3D projections of a heart. (J'') Zoomed view of the box in J'.  
342 (K-K'') Zoomed views of the box in J. Yellow arrows point to delaminating cells from the  
343 ventricle. Note the absent tdT signal from the delaminated cells (K''). (L-M') Sagittal single  
344 planes of the ventricle. (M-M') Zoomed view of the box in L. Yellow arrows highlight tdT signal.

345 (N-Q') Immunofluorescence against Beta-catenin ( $\beta$ -cat) and myosin heavy chain (MHC) in 5  
346 dpf *myl7:Gal4;eGFP:UAS:RFP* (N-O') and *myl7:Gal4;eGFP:UAS:wt1b* (P-Q') embryos. Shown  
347 are sagittal single planes of the ventricle. Single channels (N', O', P' and Q') show  $\beta$ -cat signal.  
348 LUT color shows gradient of  $\beta$ -cat signal intensity. Lower signal is in blue and the higher signal  
349 in orange to white. (O-O') Zoomed views of the box in N. (Q-Q') Zoomed views of the box in  
350 P. Marked region in P' indicates the ventricle.

351 (R-U') Immunofluorescence against Laminin (Lam) and MHC in 5 dpf  
352 *myl7:Gal4;eGFP:UAS:RFP* (R-S') and *myl7:Gal4;eGFP:UAS:wt1b* (T-U') embryos. Shown are  
353 sagittal single planes of the ventricle. Single channels (R', S', T' and U') show Laminin staining.  
354 LUT color shows gradient of laminin signal intensity. Lower intensity is in blue and the higher  
355 intensity in orange to white. (S-S') Zoomed views of the box in R'. White arrows highlight  
356 Laminin signal. (U-U') Zoomed views of the box in P. Yellow arrows highlight Laminin signal.

357 Scale bar: 50  $\mu$ m (B-B', D-D', F-F', H-H', J-J', L-L', N-N', P-P', R-R' and T-T'); 10  $\mu$ m (C-C', E-  
358 E', G, I-I', J''-K'', M-M', O-O', Q-Q', S-S' and U-U').

359 Lam, Laminin; tdT, tdTomato

360

361 To understand the basal domain landscape of cardiomyocytes we did an immunostaining  
362 against Laminin, a component of the basement membrane. Laminins have been associated  
363 with myocardial differentiation and with regulating the sarcolemmal properties (37-40). At 5  
364 dpf, in the hearts of control fish (n=5) we observed clear anti-Laminin staining at the basal and  
365 lateral domains of cardiomyocytes (Fig 4 R-S'), which correlates with previous observations  
366 (37, 41). Laminin expression levels were severely reduced in *wt1b* overexpression hearts  
367 (n=5), with no Laminin observed in the lateral domains of the cardiomyocytes (Fig 4T-U'). Thus,  
368 the observed reduced levels of Laminin and its impaired deposition upon *wt1b* overexpression  
369 point towards an improper basal domain of cardiomyocytes.

370

371 Taken together, our observations indicate that cardiomyocyte apicobasal polarization may be  
372 disrupted upon *wt1b* overexpression.

373

### 374 **Overexpression of *wt1* in cardiomyocytes hinders cell maturation and disrupts its** 375 **structural organization**

376 The disruptions in cell junctions and cell extrusion that we observed in *wt1b* overexpressing  
377 cardiomyocytes led us to question the maturation and general architecture of these cells.

378 Using whole mount immunofluorescence, we observed reduced MHC staining in —*wt1b*-  
379 overexpressing hearts at 1 dpf when compared to controls (Fig 5A-C'). The reduction of MHC  
380 staining was specific to the heart, as it was not observed in the skeletal muscle of the myotome  
381 (Fig 5D). Although at 6 dpf we observed an increase in the levels of MHC signal in *wt1b*  
382 overexpressing cardiomyocytes, the levels never reach those observed in the control group  
383 (Fig 5E-G). We also analyzed *myl7* mRNA expression levels using whole mount *in situ*  
384 hybridization. Consistent with the results obtained using MHC immunostaining, at 3 dpf, *myl7*  
385 expression was reduced in *myl7:Gal4;eGFP:UAS:wt1b* (23/25) compared to their single  
386 transgenic *eGFP:UAS:wt1b* control siblings (Fig 5H-I). We reasoned that the reduced levels

387 in MHC and *myl7* staining could be indicative of an impaired maturation of cardiomyocytes. To  
388 test this hypothesis, we performed immunofluorescence staining against Alcam, a marker for  
389 undifferentiated cardiomyocytes (42, 43). At 6 dpf, we observed higher Alcam staining levels  
390 in hearts overexpressing *wt1b* when compared to control hearts (Fig 5J-L).

391

392 **Fig 5. Changes in cardiomyocyte maturation and structure upon *wt1b* overexpression.**

393 (A) Schematic representation of the lines used and embryo orientation for stainings and  
394 imaging.

395 (B-F') Immunofluorescence against GFP and myosin heavy chain (MHC) on *myl7:Gal4;*  
396 *eGFP:UAS:RFP* and *myl7:Gal4;eGFP:UAS:wt1b* zebrafish embryos. (B-C') 3D projection of  
397 1 day post fertilization (dpf) embryos. Shown are lateral views of the cardiac tube. Yellow  
398 asterisk in C' indicates absent MHC staining in the heart. (D) MHC staining of the myotome  
399 region of the *myl7:Gal4; eGFP:UAS:wt1b* embryo at 1 hpf. (E-F') 3D projections of the heart  
400 region at 6 dpf. Shown are ventral views, the head is to the top.

401 (G) Quantification of mean fluorescence intensity in the heart region for *myl7:Gal4;*  
402 *eGFP:UAS:RFP* and *myl7:Gal4;eGFP:UAS:wt1b* zebrafish, at indicated developmental  
403 stages. Statistical significance was calculated by unpaired t-test, with Welch's correction (24  
404 hpf) and unpaired t-test for the remaining group comparisons. Means  $\pm$ SD as well as individual  
405 measurements are shown.

406 (H-I) Whole mount mRNA *in situ* hybridization against *myl7* mRNA in (H) *eGFP:UAS:wt1b* and  
407 (I) *myl7:Gal4;eGFP:UAS:wt1b* zebrafish embryos at 3 dpf. Embryos are positioned ventrally,  
408 with the head to the top.

409 (J-K') Immunofluorescence against GFP and Alcam on *myl7:Gal4;eGFP:UAS:RFP* and  
410 *myl7:Gal4;eGFP:UAS:wt1b* zebrafish embryos. Shown are 3D projection of the heart region  
411 in a 6 dpf old larva (ventral views, the head is to the top).

412 (L) Quantification of mean fluorescence intensity of anti-Alcam staining as shown in K-L'.  
413 Statistical significance was calculated by unpaired t-test, with Welch's correction. Shown are  
414 mean  $\pm$ SD as well as individual measurements.

415 (M-P') Immunofluorescence against GFP and Actinin. Shown are maximum intensity  
416 projections of two consecutive optical sections with a step size of 2  $\mu\text{m}$  of the ventricle of  
417 *myl7:Gal4;eGFP:UAS:RFP* (M-N') and *myl7:Gal4;eGFP:UAS:wt1b* (O-P') at 6 dpf. (N,N' and  
418 P,P') Maximum intensity projections of boxed regions in (M) and (O), respectively.  
419 (Q-R') Serial block face scanning electron microscope images of zebrafish hearts. Shown are  
420 single sections of *myl7:Gal4;eGFP:UAS:RFP* (Q-Q') and *myl7:Gal4;eGFP:UAS:wt1b* (R-R')  
421 hearts. Different cell layers are highlighted with colors. (Q' and R'). Zoomed areas highlighting  
422 sarcomeres. Green labels the epicardium, magenta marks the endocardial layer and orange  
423 highlights the myocardium. Orange arrowheads, z-bands; Cyan arrowhead, basement  
424 membrane delimiting epicardium and myocardium.  
425 Scale bars, 50  $\mu\text{m}$  (B-F'H-M and O-O'); 1  $\mu\text{m}$  (Q and R), 500 nm (Q' and R'), 10  $\mu\text{m}$  (N, N  
426 and P,P'). at, atrium; BM, basement membrane; CM, cardiomyocyte; dpf, days post  
427 fertilization; ECM, extracellular matrix; EnC, endothelial cell; EpC, epicardial cell; Ery,  
428 erythrocyte; v, ventricle; ; z, z-line. Green, GFP; magenta, MHC, Alcam; blue, DAPI.

429  
430 We next analyzed if sarcomere assembly was impaired in *myl7:Gal4;eGFP:UAS:wt1b*  
431 animals. We performed immunofluorescence staining against Actinin, a protein known to be  
432 produced in the z line of the sarcomeres (44). Qualitative assessment of Actinin revealed that  
433 not only the its levels were lower but also the z-lines were thicker and shorter (Fig 5M-P') upon  
434 myocardial *wt1b* overexpression. Z-line disruption was particularly evident in delaminating  
435 cardiomyocytes (Fig 5O). We next sought to analyze sarcomere structure more in detail using  
436 serial block face scanning electron microscopy (SBFSEM) (Fig 5Q-R'and S4, S5, S6 and S7  
437 Video). Z-bands were present at the sarcomere boundaries in both groups. While sarcomeres  
438 could be easily followed from z-band to z-band in the control heart (Fig 5Q-Q' and S5 Video),  
439 this was not possible in *wt1b* overexpressing hearts (Fig 5R-R'and S7 Video). A further  
440 ultrastructural defect we observed in the *wt1b* overexpression heart was the presence of large  
441 intercellular spaces of extracellular matrix, between cardiomyocytes, the epicardium, and  
442 endocardium. Moreover, while the control heart revealed a clearly visible basement membrane



443 between the epicardium and the myocardium as well the endocardium and myocardium (dark  
444 black line), this structure was not always visible in the *wt1b*-overexpressing heart (Fig 5A-B'and  
445 S3 and S5 Video). This observation correlates with the impairment in Laminin staining reported  
446 in *wt1b*-overexpressing cardiomyocytes (Fig 4P-S').

447

448 Altogether, our findings indicate that sustained expression of *wt1b* in cardiomyocytes affects  
449 heart development leading to impaired cardiomyocyte maturation and negatively affecting the  
450 cardiac ultrastructure, including cardiomyocyte sarcomere assembly and the extracellular  
451 matrix.

452

### 453 **Overexpression of *wt1b* in cardiomyocytes results in global reduced chromatin** 454 **accessibility**

455 Seeing that *wt1b* overexpression in cardiomyocytes induced several cardiac malformations  
456 and caused a phenotypic change in some cells we decided to explore how the sustained  
457 expression of this transcription factor was affecting chromatin accessibility. To this purpose,  
458 we performed Assay for Transposase-Accessible Chromatin sequencing (ATAC-seq) (45) in 5  
459 dpf, FAC sorted GFP<sup>+</sup> cells from either the *myl7:Gal4;eGFP:UAS:RFP* control or  
460 *myl7:Gal4;eGFP:UAS:wt1b* larvae (Fig 6A). We identified 1452 differential peaks in *wt1b*  
461 overexpressing cardiomyocytes, of which almost all except for 14 peaks showed reduced  
462 chromatin accessibility (Fig 6B S1 Data). Most of the differential accessible regions were  
463 located close to promoter regions (38.87%), in introns (30.37%) or in distal intergenic regions  
464 (26.14%) (Fig 6C). We performed Gene Ontology (GO) analysis for the genes lying in close  
465 proximity to the differentially accessible regions. From the top 25 Biological Pathways that had  
466 reduced accessibility of regions in close proximity of genes associated with these pathways,  
467 five of them account for muscle development (Fig 6D and S2 Data). Within the top 25 Cellular  
468 Component pathways we found some to be involved in “actin cytoskeleton”, “basolateral  
469 plasma membrane”, “apical part of the cells”, “contractile fiber” or “myofibril” (Fig 6E and S2  
470 Data). Within the top 25 Molecular Function pathways (Fig 6F and S2 Data) five of them are

471 directly implicated in transcription regulation and another four in cytoskeleton formation and  
472 cell adhesion, such as “actin binding”, “actin-filament binding”, “cell adhesion molecule binding”  
473 and “beta-catenin binding”. All of these pathways, which are underrepresented in the  
474 *myl7:Gal4;eGFP:UAS:wt1b* samples strongly correlate with the defects observed in hearts  
475 overexpressing *wt1b*. To identify potential transcription factors that might be binding to the  
476 differentially accessible regions, we performed MEME-Centrimo motif analysis, and found WT1  
477 to be one of the top 5 motifs represented (E-value = 7.8e-5). This motif could be identified in  
478 672 (46.25%) of the differentially accessible regions (3 open and 669 closed) (Fig 6G-G’). To  
479 further investigate which of the open regulatory regions and their associated genes were  
480 potential direct targets of WT1, we compared our ATAC-seq data with WT1 target genes  
481 identified in the CHIP-atlas database (46). 41% of the regions associated with differential  
482 accessibility (426, of which only 6 represent regions with open chromatin) identified in our  
483 ATAC-seq were shared with the CHIP-atlas database for WT1. GO analysis of the associated  
484 common genes identified pathways similar to those observed previously, suggesting a direct  
485 regulation of these pathways by *Wt1b* (S5 Fig).

486

487 **Fig 6. Assay for Transposase-Accessible Chromatin sequencing (ATAC-seq) in**  
488 ***wt1b*-overexpressing cardiomyocytes.**

489 (A) Schematic representation of cell acquisition for ATAC-seq.

490 (B) Graphical representation of number of differential accessible regions between  
491 *myl7:Gal4; eGFP:UAS:RFP* and *myl7:Gal4; eGFP:UAS:wt1b* cardiomyocytes at 5  
492 days post-fertilization (dpf).

493 (C) Distribution of the genomic regions with differential accessible regions.

494 (D-F) Gene Ontology (GO) pathways enrichment for differential accessible regions in  
495 cardiomyocytes after *wt1b*-overexpression. (D) Shown are selected GO Biological  
496 Pathways enrichment out of the top 25. (E) Shown are selected GO Cellular  
497 Components enrichment out of the top 25. (F) Shown are selected GO Molecular

498 Functions enrichment out of the top 25. The color scale indicates the number of genes  
499 enriched in a pathway. All pathways have enrichments significance  $p\text{-adjust} \leq 0.05$ .

500 (G-G') MEME-Centrimo WT1 motif analysis. (G') Percentage of the differential  
501 accessible regions in which the WT1 motif is represented.

502 (H) Venn Diagram comparing the number of differential accessible regions that are  
503 common between the ATAC-seq and the CHIP-atlas database for WT1.

504 (I-L') Sequencing tracks for genes with differential peaks within their genomic loci.  
505 Shown are genes representative of adherens junctions: *cdh2* (I) and *ctnn1* (I'); apical  
506 polarity, *pard6b* (J); basal polarity, *scrib* (K); and sarcomere assembly: *rbfox2* (L) and  
507 *rybpb* (L').

508

509 Having seen that overexpression of *wt1b* in cardiomyocytes affected heart development and  
510 that these changes correlated with the observed molecular signature, we looked more closely  
511 on how the genetic landscape of some of the genes with associated differentially accessible  
512 regions was affected. We had previously seen that apical cell-cell junctions were disrupted in  
513 the hearts of the *myl7:Gal4;eGFP:UAS:wt1b* embryos, including expression and localization of  
514 *cdh2*, ZO-1,  $\beta$ -Catenin. In agreement, we observed that putative regulatory regions near *cdh2*  
515 and *ctnna* (another core component of adherens junctions) revealed lower accessibility when  
516 *wt1b* was overexpressed in cardiomyocytes (Fig 6I-I'). We also observed lower accessibility  
517 in core apicobasal polarity pathway genes (47) such as *pardb6* and *pard3bb* from the apical  
518 polarity pathways and *scrib*, *dlg1* and *dlg1l* from the basolateral pathways (Fig 6J-K, S3 Data),  
519 supporting a perturbed apicobasal polarity in the *wt1b* overexpression lines. Moreover, we  
520 detected that several genes associated with sarcomere assembly such as *e2f3*, *rbfox2* and  
521 *rybp* (48-50) presented lower chromatin accessibility in *wt1b*-overexpressing cells (Fig 6L-L', S3  
522 Data), which could explain the disrupted sarcomeres observed in the overexpression line (Fig  
523 5M-R').

524 In conclusion, ATAC-seq data analysis revealed that *wt1b* overexpression in the heart  
525 decreased overall chromatin accessibility associated with key genes involved in cardiomyocyte  
526 maturation and structural differentiation, with *Wt1b* likely to directly repress gene expression  
527 programs controlling muscle development, cell polarity and actin binding.

528

529 **Overexpression of *wt1* in cardiomyocytes during embryogenesis impairs heart**  
530 **morphogenesis and induces fibrosis in the adult heart**

531 In *wt1b*-overexpression hearts, several of the top enriched Biological Pathways were  
532 associated with muscle development. Moreover, these hearts showed several impairments in  
533 cardiomyocyte differentiation and fate. In view of this, we decided to take a closer look at the  
534 overall changes in cardiac morphology and growth upon sustained myocardial *wt1b/a*  
535 overexpression. We had previously noted that those animals with strong eGFP expression  
536 throughout the myocardium presented impaired cardiac looping (Fig 5F-F'), often with a  
537 heartstring morphology (observed in n=5 out of 5 embryos by whole mount  
538 immunofluorescence). We performed *in vivo* imaging between 2 and 3 dpf, the time window of  
539 cardiac looping (4). We found that, whereas the heart of a *myl7:Gal4;eGFP:UAS:RFP* embryo  
540 looped normally, in a *myl7:Gal4;eGFP:UAS:wt1b* larva the heart started to loop, but eventually  
541 this process stopped and reverted, resulting in a tubular-like shaped heart (S6 Fig and S8  
542 Video; n=2). We analyzed looping dynamics by quantifying the angle between the ventricle  
543 and the atrium (51, 52) (S6 Fig). Whereas in 5 dpf control hearts the angle between the  
544 ventricle and the atrium was, on average, lower than 110° (108°±5), in *wt1b*-overexpressing  
545 hearts the angle was larger (142°±15) (S6 Fig).

546

547 To validate that these morphological changes were specific to the overexpression of *wt1* in  
548 cardiomyocytes we decided to induce *wt1b* expression in other cardiac cell populations (S3  
549 Fig). For that, we crossed the *Tg(eGFP:UAS:wt1b)* into *Tg(fli1a:Gal4)* (51), to overexpress  
550 *wt1b* in the endocardium (S3 Fig), and into *TgBAC(nfatc1:GAL4ff)<sup>mu286</sup>* (52), to overexpress

551 *wt1b* in the atrioventricular valves (S3 Fig) . We could not detect any apical delamination,  
552 looping defects or reduced MHC expression in these hearts at 3 dpf and 5 dpf.

553

554 As cardiomyocyte and general heart morphology were affected, we decided to evaluate  
555 cardiac performance. We did *in vivo* imaging and analyzed different parameters for heart  
556 function in *myl7:Gal4;eGFP:UAS:wt1b* and *myl7:Gal4; eGFP:UAS:RFP* larvae. We analyzed  
557 cardiac function at 2 dpf, the time point at which we first observed cardiac malformations, as  
558 well as at 5 dpf, once looping has concluded (S6 Fig; n=14). First, we assessed stroke volume  
559 (53, 54), which indicates the volume of blood that the heart is capable of pumping in each  
560 contraction. *myl7:Gal4;eGFP:UAS:wt1b* ventricles presented a reduced stroke volume at 2 dpf  
561 ( $0.11\pm 0.04$  nl vs  $0.04\pm 0.03$  nl) and this impairment did not recover at 5 dpf ( $0.39\pm 0.17$  nl vs  
562  $0.22\pm 0.08$  nl) (S6 Fig). We next analyzed the heart rate. Although at 2 dpf we could not detect  
563 changes in heart rate ( $114\pm 8$  beats per min (bpm) vs  $119\pm 8$  bpm) we observed a significant  
564 decrease in the *wt1b* overexpression heart frequency at 5 dpf ( $166\pm 13$  bpm vs  $141\pm 9$  bpm)  
565 (S6 Fig). The reduced stroke volume together with the decreased heart rate indicates that the  
566 *wt1b* overexpression animals have also an impaired cardiac output. Following on this  
567 observation, next we measured the ejection fraction for the ventricle and the atrium (54). We  
568 found that in the atrium, at 2 dpf, the ejection fraction did not significantly change between both  
569 groups ( $43\pm 14$  % vs  $51\pm 8$  %). However, at 5 dpf there was a clear reduction in the ejection  
570 fraction of the atrium ( $55\pm 8\%$  vs  $41\pm 12\%$ ). In contrast, the ventricular ejection fraction was  
571 initially significantly reduced at 2 dpf in *wt1b* overexpressing embryos ( $48\pm 13\%$  vs  $35\pm 13\%$ ),  
572 but recovered at 5 dpf ( $50\pm 8\%$  vs  $49\pm 8\%$ ) (S6 Fig).

573

574 We also noted that, already at 2 dpf, the atria of *wt1b*-overexpressing animals seemed to be  
575 much larger than that of the *eGFP:UAS:RFP* line (Fig 7A-C'). This difference in atria size was  
576 sustained at 5 dpf (Fig 7D-E'). To confirm that the atria were indeed larger in these animals we  
577 first calculated the ratio between the atrium and ventricle volume at 5 dpf. We saw that in *wt1b*-  
578 overexpressing hearts at 5 dpf the atria were on average 1.5 times larger than the ventricle,

579 whereas in the control group they were only 0.5 times bigger (Fig 7F). To evaluate what could  
580 be the cause of this atrial enlargement, we counted the number of atrial and ventricular  
581 cardiomyocytes. While the number of MHC-positive cells in the ventricles was only slightly  
582 smaller than in the *wt1b*-overexpressing hearts ( $163\pm 47$  vs  $95\pm 24$ ), there was a significant  
583 increase in MHC-positive cells in *myl7:Gal4;eGFP:UAS:wt1b* atria ( $63\pm 8$  vs  $132\pm 11$ ) (Fig 7 G-  
584 G'). This indicated that atrial enlargement in *wt1b*-overexpressing hearts might be due to cell  
585 hyperplasia. To understand what could be the source of the excess of atrial cells, we performed  
586 BrdU staining to evaluate proliferation. We calculated the ratio of proliferating cardiomyocytes  
587 per total amount of cardiomyocytes for each chamber. Contrary to our expectations, in the atria  
588 of *wt1b*-overexpressing hearts cardiomyocyte proliferation was significantly reduced (Fig 7H),  
589 while in the ventricle proliferation was not affected (Fig 7H'). This could indicate that atrial  
590 hyperplasia is more likely to be due to a continuous inflow of cardiac precursors, rather than  
591 overproliferation of the cells in this chamber. Atrial enlargement persisted also in juvenile  
592 stages (S7 Fig). Due to the severity of the phenotype (S2 Table), few *myl7:Gal4;eGFP-UAS-*  
593 *wt1b* animals survived past 6 dpf. Therefore, we used the *myl7:CreERT2:eGFP-T2A-wt1a* line  
594 to evaluate the morphology of the adult heart. We analyzed adult hearts from embryonically  
595 recombined and 4-OHT untreated *myl7:CreERT2:eGFP-T2A-wt1a* animals (Fig 7K).  
596 Consistent with our result with *wt1b*, we observed that animals overexpressing *wt1a* in  
597 cardiomyocytes starting at an embryonic stage, revealed an enlarged atrium (22/42) (Fig 7 L-  
598 M). The increase could be quantified by micro computed tomography scanning (micro-CT) and  
599 shown to correspond to a doubling of the normal atrial volume (Fig 7N-R").

600

601 **Fig 7. Overexpression of *wt1a* or *wt1b* in cardiomyocytes causes morphological**  
602 **changes in the zebrafish heart.**

603 (A) Schematic representation of lines used and embryo orientation for imaging.

604 (B-E') Immunofluorescence against GFP and myosin heavy chain (MHC) on  
605 *myl7:Gal4; eGFP:UAS:RFP* and *myl7:Gal4;eGFP:UAS:wt1b* zebrafish embryos.

606 Shown are 3D projections of the heart region of 2 days postfertilization (dpf) embryos  
607 (B-C'), 6 dpf larvae (D-E').  
608 (F) Quantification of the ratio of the atrium and ventricle volumes of 5 dpf zebrafish  
609 hearts. Statistical significance was calculated by unpaired t-test. Shown are mean  $\pm$ SD  
610 as well as individual measurements.  
611 (G-G') Quantification of the number of ventricular (G) and atrial (G') cardiomyocytes in  
612 5 dpf zebrafish hearts. Statistical significance was calculated by unpaired t-test. Shown  
613 are mean  $\pm$ SD as well as individual measurements.  
614 (H-I') Immunofluorescence against BrdU and myosin heavy chain (MHC) on  
615 *myl7:Gal4; eGFP:UAS:RFP* (H-H') and *myl7:Gal4;eGFP:UAS:wt1b* (I-I') zebrafish  
616 embryos. Shown are 3D projections of the heart region of 5 dpf. The box on the top  
617 right corner of panels H and I show zoomed views of the boxed region in the 3D  
618 projections of the hearts. Zoomed views are maximum intensity projections of two  
619 consecutive slices highlighting the BrdU and MHC positive cells.  
620 (J-J') Quantification of the ratio of the BrdU+ cardiomyocytes per total number of  
621 cardiomyocytes in the atrium (H) and ventricle (H') of 5 dpf zebrafish hearts. Statistical  
622 significance was calculated by unpaired t-test. Shown are mean  $\pm$ SD as well as  
623 individual measurements.  
624 (K) Schematic representation of the time points during which 4-hydroxy-tamoxifen (4-  
625 OHT) was administered to *myl7:CreERT2; $\beta$ -actin:loxP-DsRed-loxP-eGFP-T2A-wt1a*  
626 fish (in short *myl7:CreERT2;eGFP-T2A-wt1a*). Controls are *myl7:CreERT2;eGFP-*  
627 *T2A-wt1a* that were not treated with 4-OHT. Hearts were collected at 12 months  
628 postfertilization (mpf).  
629 (L-M) Bright field images of whole mount adult zebrafish hearts untreated (L) and  
630 treated with 4-OHT during embryogenesis (M).

631 (N-O) micro-computed tomography (micro-CT) image of adult heart of untreated (N)  
632 and fish treated with 4-OHT (O) during embryogenesis.  
633 (P-Q) 3D volumetric rendering of 3D images acquired with a microCT of adult hearts.  
634 (P) untreated, (Q) 4-OHT treated.  
635 (R-R') Quantification of chambers volumes of adults *myl7:CreERT2;eGFP-T2A-wt1a*  
636 that were not treated with 4-OHT hearts. (R) Shown are the differences in ventricle  
637 volume between recombined and non-recombined hearts. Each point represents one  
638 heart. (R') Quantification of the differences in atrium volume between recombined and  
639 non-recombined hearts. Each point represents one heart. (R'') Quantification of the  
640 ratio between the volume of the atrium and the ventricle from micro-CT images  
641 acquired from heart of the two experimental groups. Each point represents one heart.  
642 Statistical significance was calculated with an unpaired t-test. Shown are means  $\pm$ SD.  
643 Scale bar: 50  $\mu$ m (B-E' and H-I') and 500  $\mu$ m (L-Q). at, atrium; v, ventricle; ba, bulbus  
644 arteriosus.

645  
646 We further analyzed *myl7:CreERT2; eGFP-T2A-wt1a* hearts on histological sections (S7 Fig).  
647 Similarly to what we had seen in the juvenile hearts of the *wt1b* overexpressing fish (S7 Fig),  
648 we found a high degree of myocardialization of *wt1a*-overexpressing atria, a feature  
649 resembling trabeculation in the ventricle (S7 Fig, n=3/4). Furthermore, we detected the  
650 deposition of fibrotic tissue around atrial walls (S7 Fig, n=4/4). Immunolabelling with anti-  
651 Col1a1 confirmed these findings. Whereas in the control animals Col1a1 labelling was only  
652 detected in the valves (S7 Fig), in hearts of recombined *myl7:CreERT2; eGFP-T2A-wt1a*  
653 animals large regions of the atria were also Col1a1-positive. These were in close proximity  
654 with eGFP-positive cells, which might indicate that *wt1a*-expressing cardiomyocytes are  
655 secreting Col1a1 (S7 Fig). In sum, induced expression of *wt1a/b* in cardiomyocytes leads to  
656 atrial hypertrophy, which in the adult is accompanied by interstitial fibrosis.

657



658 Taken together, our data indicates that apart from the induction of cell fate change from  
659 cardiomyocytes to epicardial cells, overall, sustained expression of *wt1b* in cardiomyocytes  
660 affects heart development leading to impaired cardiomyocyte maturation, increased atrial size  
661 due to cardiomyocyte hyperplasia, as well as defective cardiac looping and heart function.

662

## 663 **DISCUSSION**

664 During myocardial development, cells from the precardiac mesoderm enter the heart tube. In  
665 the zebrafish, the myocardial tube is comprised of an epithelial lining which forms a continuum  
666 with the *wt1a* and *wt1b*-positive pericardial mesothelium (9, 18). We observed that during heart  
667 tube extension, *wt1b*-positive mesothelial cells enter the heart tube and differentiate into  
668 cardiomyocytes. Concomitantly, *wt1b* reporter gene expression is downregulated, suggesting  
669 that *wt1* downregulation is needed for myocardial maturation. This process seems to be  
670 conserved across species as active repression of *wt1* locus is detected also detected during  
671 the differentiation process of mouse embryonic stem cells into cardiomyocytes (20). In  
672 addition, recently, it has been shown that during early stages of mouse heart development  
673 there is a common progenitor pool that can give rise to both epicardial as well as myocardial  
674 cells (55). Given that sustained *wt1* activity reduced chromatin accessibility in regulatory  
675 regions associated with cardiomyocyte-specific genes and that *wt1* activity in cardiomyocytes  
676 can induces their phenotypic switch from myocardial to epicardial cells, we conclude that *wt1*  
677 downregulation is a prerequisite for cardiomyocyte differentiation.

678

679 During proepicardium formation, *wt1*-positive cells apically extrude from the dorsal pericardial  
680 mesothelium giving rise to proepicardial cell clusters that subsequently are transferred to the  
681 myocardium (56). Here we find that *wt1*-positive cells in the myocardium undergo a similar  
682 process and delaminate apically from the myocardial epithelium. It will be important to further  
683 decipher possible parallelisms between these two processes and elucidate the direct role of  
684 *wt1* during these cellular rearrangements. *Wt1* participates in the mesothelial-to-mesenchymal

685 transition giving rise to epicardial derived cells (EPDCs) (57, 58). Moreover, *Wt1* has been  
686 suggested to control the retinoic acid (RA) signaling pathway during EPDC formation (58),(59).  
687 The fact that cardiomyocytes overexpressing *wt1* are relocating to the epicardial layer might  
688 indicate that these cells undergo EMT-like processes in response to *wt1* overexpression, a  
689 process, which might be mediated by RA. However, we did not observe *aldh1a2* expression in  
690 the myocardium, prior to delamination suggesting that *aldh1a2* expression might be a  
691 consequence rather than a cause of apical delamination of *wt1a* or *wt1b* expressing cells. Of  
692 note, not all eGFP-positive cardiomyocytes undergo delamination. It might thus be possible  
693 that not all cardiomyocytes have the capacity to respond to the same extent to *wt1*  
694 overexpression. Indeed, in the mouse a small subset of cardiomyocytes has been shown to  
695 express *Wt1* and as such, not all cardiomyocytes might be equally sensitive to a change in  
696 *Wt1* dosage (60, 61).

697 Cardiomyocyte extrusion has been observed in *klf2* and *snai1* mutant zebrafish (26, 62) ).  
698 While in both cases, extruded cardiomyocytes are eliminated, here we report that the extruded  
699 cells remain on the myocardial surface contributing to the epicardial layer.

700 *Wt1* lineage tracing studies using Cre/lox transgenic lines in the mouse, suggested that  
701 epicardial derived cells were able to contribute to cardiomyocytes during development and  
702 repair (63, 64). Here we report the opposite phenotypic switch induced by *Wt1*. *Wt1*  
703 overexpression in cardiomyocytes had also been suggested to trigger a change in cell fate in  
704 a pathological condition (65). In arrhythmogenic right ventricular cardiomyopathy (ARVC), a  
705 disease-causing arrhythmia leading to the accumulation of fat deposits in the heart, a subset  
706 of cardiomyocytes has been suggested to start to express *Wt1* and convert into adipocytes.  
707 Interestingly, epicardial fat represents an epicardial derivative (66). Together with our results,  
708 this indicates that expression of *Wt1* in cardiomyocytes contributes to a phenotypic change,  
709 transforming them into epicardial cells or EPDC-like cells. In line with this, in the adult heart  
710 we observed the deposition of fibrotic tissue in close proximity to *wt1a*-overexpressing cells.  
711 The fibrosis might be a consequence of atrial hypertrophy, that is often accompanied by scar

712 deposition(67), or, alternatively, might indicate that *wt1a* overexpressing cells differentiate or  
713 adopt features of EPDCs, in this case extracellular matrix producing fibroblasts.

714

715 *wt1b* overexpressing hearts revealed defects such as alterations in muscle cell maturation and  
716 sarcomere organization. The fact that sarcomere assembly and stabilization was affected  
717 could indicate a general reduced maturity of cardiomyocytes upon overexpression of *wt1b*,  
718 which also comes in line with the increased expression of Alcam (43), and reduction in  
719 chromatin accessibility of regulatory regions in the vicinity of genes associated with GO  
720 pathways related with muscle cell and tissue development and differentiation. Previous work  
721 hinted that *Wt1* expression prevented the activation of a muscle differentiation program in  
722 metanephric-mesenchymal stem cells (68). Also, recent work on the overexpression of *wt1* in  
723 an in vitro model of cardiomyocyte differentiation showed reduced cardiomyocyte contractility  
724 (69), supporting our observations that *wt1* downregulation is a prerequisite to allow myocardial  
725 maturation.

726

727 A striking phenotypic consequence of *wt1* overexpression is atrial hyperplasia. Enlarged atria  
728 might be caused by over proliferation of cardiomyocytes in the atrium, or by increased  
729 incorporation of cardiac progenitors from the pericardial mesothelium. Recently it was shown  
730 that *lamb1a* mutants have atrial enlargement, most likely due to an excess of second heart  
731 field progenitors being added to that region (41). Since we did not observe increased cell  
732 proliferation in the atria, the main reason for observing larger atria upon *wt1* overexpression  
733 might be that more precursor cells enter the heart during embryogenesis, which might also be  
734 linked to the reduced expression of Laminin we observed. This might be secondary to the delay  
735 in maturation, which increases the extent of precursors entering the heart.

736

737 In conclusion, induced expression of *wt1* in cardiomyocytes during embryogenesis impairs  
738 cardiomyocyte maturation and promotes a fate change from cardiomyocytes to epicardial cells.  
739 This suggests that during cardiac development, *wt1a/b* expression is turned off in

740 cardiomyocytes once they enter the heart tube to allow their correct differentiation. Dissecting  
 741 the regulatory mechanisms controlling *wt1a/b* transcription in cardiomyocyte precursors will  
 742 further expand our knowledge on the tight spatio-temporal control of heart tube expansion and  
 743 concomitant differentiation.

744

745 **Materials and Methods**

| REAGENT/RESOURCE                                                                  | SOURCE                   | IDENTIFIER                  |
|-----------------------------------------------------------------------------------|--------------------------|-----------------------------|
| <b>Antibodies</b>                                                                 |                          |                             |
| Rabbit polyclonal anti-Aldh1a2                                                    | GeneTex                  | Cat# GTX124302              |
| Mouse monoclonal anti-CD166 antigen homologue A (neurolin) (Alcama)               | DSHB                     | Cat # ZN-8                  |
| Mouse monoclonal anti $\alpha$ -Actinin (sarcomeric) clone EA-53                  | Sigma Aldrich            | Cat # A7811                 |
| Mouse monoclonal anti-Caveolin 1                                                  | BD biosciences           | Cat# 610406                 |
| Chicken polyclonal anti-GFP                                                       | Aves Labs                | Cat# GFP-1010               |
| Mouse monoclonal anti-myosin, sarcomere (MHC)                                     | DSHB                     | Cat# MF 20, RRID:AB_2147781 |
| Mouse monoclonal anti-procollagen type I aminoterminal extension peptide (Col1a1) | DSHB                     | Cat# SP1.D8                 |
| Goat anti-Chicken IgY (H+L), Alexa Fluor® 488 conjugate                           | Thermo Fisher Scientific | Cat # A-11039               |
| Goat anti-Mouse IgG2b, Alexa Fluor® 568 conjugate                                 | Thermo Fisher Scientific | Cat # A-21144               |
| Goat anti-Mouse IgG2b, Alexa Fluor® 647 conjugate                                 | Thermo Fisher Scientific | Cat #A-21242                |

|                                                                           |                          |                       |
|---------------------------------------------------------------------------|--------------------------|-----------------------|
| Goat Anti-Mouse Immunoglobulins/HRP                                       | Dako                     | Cat # P 0447          |
| Goat anti-Rabbit IgG (H+L) Secondary Antibody, Alexa Fluor® 568 conjugate | Thermo Fisher Scientific | Cat # A-11036         |
| Goat anti-Mouse IgG1, Alexa Fluor® 568 conjugate                          | Thermo Fisher Scientific | Cat # A-21124         |
| <b>Primers</b>                                                            |                          |                       |
| Gene                                                                      | Forward primer           | Reverse Primer        |
| <i>Gfp</i>                                                                | CAAGATCCGCCACAACATCG     | GACTGGGTGCTCAGGTAGTG  |
| <i>wt1a OE</i>                                                            | GAGCCATCCCGGAGGTTATG     | GGTACTCTCCGCACATCCTG  |
| <i>tcf21</i>                                                              | ATGTCCACCGGGTCCATCAG     | TCAGGAAGCTGTAGTCCCGCA |
| <b>Chemicals, Peptides, and Recombinant Proteins</b>                      |                          |                       |
| 4-hydroxytamoxifen                                                        | Sigma Aldrich            | Cat#H6278             |
| Rhodamine Phalloidin                                                      | Thermo Fisher Scientific | Cat# R415             |
| N-Phenylthiourea (PTU)                                                    | Sigma Aldrich            | Cat# P7629            |
| Proteinase K                                                              | Roche                    | Cat# 03115801001      |
| Heparin sodium salt from porcine intestinal mucosa                        | Sigma- Aldrich           | Cat# H4784            |
| Formamide                                                                 | Sigma- Aldrich           | Cat# 47670-1L-F       |
| Blocking reagent                                                          | Sigma-Aldrich            | Cat# 11096176001      |
| Ribonucleic acid from torula yeast                                        | Sigma- Aldrich           | Cat# R6625-25G        |
| HBSS (10X), no calcium, no magnesium, no phenol red                       | Thermo Fisher Scientific | Cat# 14185052         |

|                                                                       |       |                          |                  |
|-----------------------------------------------------------------------|-------|--------------------------|------------------|
| Corning™<br>Trypsin/0.53mM EDTA in HBSS<br>w/o Calcium and Magnesium  | 0.05% | Thermo Fisher Scientific | Cat# MT25051CI   |
| Collagenase                                                           |       | Sigma                    | Cat # C8176      |
| BSA                                                                   |       | Sigma                    | Cat# A3059       |
| <b>Kits</b>                                                           |       |                          |                  |
| SMARTer® Ultra™ Low Input<br>RNA for Illumina® Sequencing –<br>HV kit |       | Takara                   | Cat# 634828      |
| Agilent's High Sensitivity DNA Kit                                    |       | Agilent                  | Cat# 5067-4626   |
| Low Input Library Prep Kit                                            |       | Illumina                 | Cat# 634947      |
| Illumina Nextera kit                                                  |       | Illumina                 | Cat# Fc-121-1030 |
| Illumina Tagment DNA TDE1<br>Enzyme and Buffer Kits                   |       | Illumina                 | Cat# 20034198    |
| DT® for Illumina Nextera DNA<br>Unique Dual Indexes Set C             |       | Illumina                 | Cat# 20027215    |
| Bioline MyFi Mix                                                      |       | Meridian Bioscience      | Cat# Bio-25050   |
| MinElute PCR Purification Kit                                         |       | Qiagen                   | Cat# 28004       |
| AMPure XP                                                             |       | Beckman Coulter          | Cat # A63882     |
| Qubit dsDNA HS Assay Kit                                              |       | Thermo Fisher Scientific | Cat# Q32854      |
| NGS Fragment Kit                                                      |       | Agilent                  | Cat# DNf-473     |
| Bioline JetSeq library<br>Quantification Lo-ROX kit                   |       | Meridian Bioscience      | Cat# Bio-68029   |
| NovaSeq XP 2-Lane Kit v1.5                                            |       | Illumina                 | Cat# 20043130    |
| NovaSeq 6000 SP Reagent Kit<br>v1.5                                   |       | Illumina                 | Cat# 20040719    |
| <b>Software and Algorithms</b>                                        |       |                          |                  |

|                                                                     |                    |                          |
|---------------------------------------------------------------------|--------------------|--------------------------|
| Fiji                                                                | NIH                | SCR_002285               |
| GraphPad Prism 7                                                    | GraphPad Software  | SCR_002798               |
| Imaris 9.5.1                                                        | Bitplane           |                          |
| MATLAB R2017a                                                       | MathWorks          |                          |
| <b>Specialized Material</b>                                         |                    |                          |
| U-shaped glass capillaries                                          | Leica microsystems | Cat # 158007061          |
| MatTek imaging dish, 35 mm                                          | MatTek Corporation | Cat # P35G-0-20-C        |
| Tungsten needles                                                    |                    |                          |
| <b>Microscopes and Imaging machines</b>                             |                    |                          |
| Nikon SMZ800N                                                       | Nikon              |                          |
| Leica TCS SP8 digital light sheet (DLS)                             | Leica              |                          |
| Imager M2                                                           | Zeiss              |                          |
| LSM 880 confocal microscope, with Airyscan                          | Zeiss              |                          |
| Micro-CT Skyscan 1272                                               | Bruker             |                          |
| Quanta FEG 250 SEM (serial block face scanning electron microscope) | FEI                |                          |
| <b>Experimental Models: Organisms/Strains</b>                       |                    |                          |
| <i>Et(-26.5Hsa.WT1-gata2:eGFP)cn1 (epi:eGFP)</i>                    | (9)                | ZDB-ETCONSTRUCT-170823-1 |
| <i>Tg(myI7:mRFP)</i>                                                | (70)               | ZDB-TGCONSTRUCT-080917-1 |
| <i>Tg(fli1a:Gal4); ubx3Tg</i>                                       | (51)               | ZDB-ALT-120113-6         |
| <i>Tg(myI7:Gal4)<sup>cbg2Tg</sup></i>                               | (23)               | ZDB-TGCONSTRUCT-150108-1 |
| <i>Tg(-3.5ubi:loxP-eGFP-loxP-mCherry)<sup>cz1701</sup></i>          | (71)               | ZDB-TGCONSTRUCT-110124-1 |

|                                                                 |                 |                         |
|-----------------------------------------------------------------|-----------------|-------------------------|
| <i>Tg(eGFP:5xUAS:RFP; gcryst:cerulean)<sup>cn15</sup></i>       | (24)            | ZDB-TGCONSTRCT-190724-4 |
| <i>Tg(bGl-eGFP:5xUAS:wt1b -bGl; cryaa:eCFP)<sup>brn4</sup></i>  | This manuscript | ZDB-ALT-200327-14       |
| <i>Tg(bactin2:loxP-DsRed2-loxP-eGFP-T2A-wt1a)<sup>l21</sup></i> | This manuscript | N/A                     |
| <i>Tg(bGl-eGFP:5xUAS:tcf21 -bGl; cryaa:eCFP)</i>                | This manuscript | N/A                     |

746

### 747 **Zebrafish husbandry**

748 Experiments were conducted with zebrafish embryos and adults aged 3–18 months, raised at  
 749 maximal 5 fish/l. Fish were maintained under the same environmental conditions: 27.5-28°C,  
 750 with 14 hours of light and 10 hours of dark, 650-700µs/cm, pH 7.5 and 10% of water exchange  
 751 daily. Experiments were conducted after the approval of the "Amt für Landwirtschaft und Natur"  
 752 from the Canton of Bern, Switzerland, under the licenses BE95/15 and BE 64/18.

753

### 754 **Generation of transgenic lines**

755 To generate the transgenic line *eGFP:UAS:wt1b* and the *eGFP:UAS:tcf21* the RFP fragment  
 756 from the plasmid used to clone *eGFP:5xUAS:RFP* (24) was replaced by either the coding  
 757 sequence of *wt1b(-KTS)* isoform or of *tcf21*, PCR amplified from 24 hpf and 5 dpf zebrafish  
 758 embryo cDNA and assembled using Gibson cloning. The final entire construct is flanked with  
 759 *Tol2* sites to facilitate transgenesis. In this line, tissue specific expression of Gal4 drives the  
 760 bidirectional transactivation of the UAS leading to the expression of both *eGFP* and *wt1b(-*  
 761 *KTS)* or *tcf21* coding sequence. The full name of these lines is *Tg(bGl-eGFP:5xUAS:wt1b(-*  
 762 *KTS)-bGl; cryaa:eCFP)<sup>brn4</sup>*, *Tg(bGl-eGFP:5xUAS:tcf21)-bGl; cryaa:eCFP)<sup>brn4</sup>*.

763 The construct *bactin2:loxP-DsRed2-loxP-eGFP-T2A-wt1a* was generated by Gateway cloning  
 764 (MultiSite Gateway Three-Fragment Vector Construction Kit; Invitrogen). As destination vector  
 765 pDestTol2pA2 was used. The floxed *DsRed2* cassette was derived from vector *pTol2-*



766 *EF1alpha-DsRed(floxed)-eGFP* (72) and the *wt1a* cDNA was amplified from vector *pCS2P-*  
767 *wt1a* (14). The final construct is flanked with *Tol2* sites to facilitate transgenesis. In the  
768 resulting zebrafish line *DsRed* is expressed from the ubiquitous  $\alpha$ -*actin* promoter. After Cre-  
769 mediated excision of the STOP cassette both *eGFP* as well as *wt1a* are expressed in a tissue-  
770 specific manner. The full name of this line is *Tg(bactin2:loxP-DsRed2-loxP-eGFP-T2A-*  
771 *wt1a)<sup>l21</sup>*.

772

### 773 **Administration of 4-Hydroxytamoxifen (4-OHT) to embryos and juvenile fish**

774 4-hydroxytamoxifen (4-OHT; Sigma H7904) stock was prepared by dissolving the powder in  
775 ethanol, to 10 mM concentration. To aid with the dissolution the stock was heated for 10  
776 minutes (min) at 65°C and then stored at -20°C, protected from the light. 4-OHT was  
777 administered at the indicated times, at a final concentration of 10  $\mu$ M. For embryos, treatments  
778 were performed continuously. For juvenile fish 4-OHT was administered overnight in E3. Prior  
779 to administration, the 10 mM stock was warmed for 10 min at 65 °C (73).

780

### 781 ***In vivo* light sheet fluorescence microscopy and retrospective gating**

782 For *in vivo* imaging of the beating zebrafish heart, 2 dpf old embryos were pipetted with melted  
783 1% low melting agarose in E3 medium (about 45°C), containing 0.003% 1-phenyl-2-thiourea  
784 (PTU) (*Sigma-Aldrich*) to avoid pigmentation and Tricaine at 0.08 mg/ml, pH 7 to anaesthetize  
785 the fish, into a U-shaped glass capillaries (Leica microsystems). This U-shaped capillary was  
786 mounted in a 35 mm MatTek imaging dish. The dish was filled with E3 medium containing  
787 0.003% PTU and Tricaine at 0.08 mg/ml, pH 7.

788 Imaging was performed with the Leica TCS SP8 digital light sheet (DLS) microscope. We used  
789 a 25x detection objective with NA 0.95 water immersion and a 2.5x illumination objective with  
790 a light sheet thickness of 9.4  $\mu$ m and length of 1197  $\mu$ m. The total field of view is 295 x 295  
791  $\mu$ m, fitting the size of the embryonic zebrafish heart, allowing space for sample drift. The  
792 images were acquired in XYTZL-acquisition (XY: single optical section, T: time series, Z: serial

793 optical sections, L: looped acquisition) mode for later retrospective gating. The parameters as  
794 shown in Table 3 were applied.

795

796 The images were saved as single *.lif*-file and transferred to a workstation (*HP-Z series, Dual*  
797 *Intel Xeon e5-2667 v4 3.2 GHz, 256 GB, NVIDIA GeForce GTX 1080 Ti*). A quality check of  
798 the data was performed, before the data were further processed. The survival of the larva until  
799 the end of the acquisition, the sample drift and the degree of bleaching were assessed in the  
800 *Processor\_6D* ([https://github.com/Alernst/6D\\_DLS\\_Beating\\_Heart](https://github.com/Alernst/6D_DLS_Beating_Heart)). The data were only used  
801 if the larva survived the acquisition. The single *.lif*-file was converted to XYTC *.tif*-files, using  
802 the *Converter\_6D* ([https://github.com/Alernst/6D\\_DLS\\_Beating\\_Heart](https://github.com/Alernst/6D_DLS_Beating_Heart)). Each XYTC file was  
803 named in the following format “*Image\_R0000\_Z0000*” to be recognized for further processing.  
804 Retrospective gating was performed as previously described (74-76). The *MATLAB* (R2017a)  
805 tool *BeatSync V2.1* was used for retrospective gating (access to the software can be requested  
806 from the research group of Michael Liebling). The settings for re-synchronization in the  
807 *BeatSync* software were “*Normalized mutual information*”, “*Recursive Z-alignment*” and  
808 “*Nearest-neighbor interpolation*”. One entire heart cycle was re-synchronized in 3D. After re-  
809 synchronization, a 3D time lapse of a virtually still heart was created, using the Fiji (77) tool  
810 *Make\_timelapse* ([https://github.com/Alernst/Make\\_timelapse](https://github.com/Alernst/Make_timelapse)) using the *Make\_timelapse Fiji*  
811 plugin. The time lapse was represented as maximum intensity projection or individual optical  
812 slices.

813

#### 814 **SMARTer-seq**

815 Dorsal pericardium, proepicardium and heart-tube were manually dissected, with tungsten  
816 needles, from 60 hpf *epi:eGFP;myl7:mRFP* zebrafish larvae. A minimum of 10 of each  
817 tissue/organ were collected for each sample in ice cold PBS. Cells were centrifuged for 7  
818 minutes at 250 g. The excess liquid was removed, and the cells were stored at -80°C  
819 until further use. RNA was directly transformed and amplified into cDNA from the lysed  
820 tissue using the SMARTer® Ultra™ Low Input RNA for Illumina® Sequencing – HV kit.

821 cDNA quality control was verified using the Agilent 2200 BioAnalyzer and the High  
822 Sensitivity DNA Chip from Agilent's High Sensitivity DNA Kit. Next, 50 ng of amplified  
823 cDNA were fragmented with the Covaris E220 (Covaris) and used for preparing  
824 sequencing libraries using the TruSeq RNA Sample Prep Kit v2 kit (Illumina), starting  
825 from the end repair step. Finally, the size of the libraries was checked using the Agilent  
826 2200 Tape Station DNA 1000 and the concentration was determined using the Qubit®  
827 fluorometer (Thermo Fisher Scientific). Libraries were sequenced on a HiSeq 2500  
828 (Illumina) to generate 60 bases single reads. FastQ files were obtained using CASAVA  
829 v1.8 software (Illumina). NGS experiments were performed in the Genomics Unit of the  
830 CNIC.

831

### 832 **SMARTer-seq analysis**

833 All bioinformatics analysis were performed using bash scripts or R statistical software. Quality  
834 check of the samples was performed using FASTQC and reports summarized using MultiQC  
835 (78, 79). Adapters from the fastq files were trimmed using fastp software (80). Reads were  
836 aligned to GRCz11 danRer11 v102 assembly from Ensembl using STAR (81). The reads were  
837 summarized using featureCounts (82). The counts data were imported to Deseq2 and genes  
838 who had expression across all samples (rowSums) greater than or equal to 10 were kept  
839 ensuring the reliable expression estimates (83). After evaluation of the PCA, one of the  
840 samples from the heart tube was determined as an outlier and removed from the downstream  
841 analysis. The differential expression analysis was performed using 'ashr' LFC Shrikange (84).  
842 A gene was considered as significant if the p adjusted value was <0.05. The plots were plotted  
843 using ggplot2 (85).

844

### 845 **Immunofluorescence**

846 Whole mount immunofluorescence on embryos was done as previously described (24).  
847 Shortly, embryos were fixed over-night, at 4 °C in 4% paraformaldehyde (PFA) (EMS, 15710).

848 Then they were washed with PBS-Tween20 (0.1%) and permeabilized for 30 to 60 min with  
849 PBS-TritonX100 (0.5%), depending on the stage and the antibody used. Permeabilization was  
850 followed by blocking for 2 hours with histoblock (5% BSA, 5% goat serum, 20mM MgCl<sub>2</sub> in  
851 PBS). Afterwards, embryos were incubated overnight, at 4 °C, with the primary antibodies, in  
852 5%BSA. The next day embryos were washed with PBS-Tween20 (0.1%) followed by and  
853 overnight incubation in the secondary antibodies, at 4 °C, in 5% BSA. Finally, embryos were  
854 washed with PBS-Tween20 (0.1%) and a nuclear counterstain with DAPI (Merck, 1246530100)  
855 1:1000 was done.

856 Immunofluorescence on paraffin sections was performed as previously described (86). Briefly,  
857 paraffin sections were dewaxed and rehydrated through a series of ethanol incubations, similar  
858 to previously described for histological staining. Afterwards, epitope was recovered by boiling  
859 the samples in 10mM citrate buffer, pH 6, for 20 min. Next the same procedure was applied as  
860 described above for whole mount immunofluorescence.

861 The following antibodies were used: primary antibodies - anti-eGFP (Aves, eGFP-1010) was  
862 at 1:300, anti-Myosin Heavy Chain at 1:50 (DSHB Iowa Hybridoma Bank, MF20), anti-  
863 Aldh1a2 at 1:100 (Gene Tex), anti-Alcam at 1:100 (DSHB Iowa Hybridoma Bank, Zn-8), anti-  
864  $\alpha$ -actinin at 1:200 (Sigma Aldrich), anti-embryonic Cardiac-Myosin Heavy Chain at 1:20 (DSHB  
865 Iowa Hybridoma Bank, N2.216), anti-Caveolin 1 at 1:100 (BD Biosciences) and anti-  
866 Procollagen Type I at 1:20 (DSHB Iowa Hybridoma Bank, SP1.D8). Secondary antibodies  
867 were Alexa Fluor 488, 568, 647 (Life Technologies) at 1:250 and biotin anti-rabbit (Jackson  
868 Immuno Research, 111-066-003) followed by StreptavidinCy3 or Cy5 conjugate (Molecular  
869 Probes, SA1010 and SA1011) at 1:250.

870

### 871 **qRT-PCR assay**

872 Hearts from *Tg(eGFP:5xUAS:wt1bOE-KTS;myl7:Gal4)* and *Tg(eGFP:5xUAS:RFP;*  
873 *myl7:Gal4)* were extracted at 40 dpf. Ventricle, atrium and bulbus arteriosus were manually  
874 dissected and stored separately in pools of 5. For each sample, between 3 and 7 biological  
875 replicates were collected. Total RNA was extracted by using TRI Reagent (Sigma-Aldrich; Cat-

876 No. T9424) according to the manufacturer's recommendations. Afterwards, a total of 200 ng  
877 of total RNA was reverse-transcribed into cDNA using High Capacity cDNA Archive Kit  
878 (Invitrogen Life Technologies; Cat-No. 4374966). Quantitative PCR (qPCR) was performed in  
879 a 7900HT Fast real-time PCR system (Applied Biosystems). qPCR was done using Power Up  
880 SYBR Green Master Mix (Applied Biosystems, A25742).  
881 PCR program was run as follows: initial denaturation step was done for 30 s at 95°C, followed  
882 by 40 cycles at 95°C for 5 s and 60°C for 30 s. To calculate the relative index of gene  
883 expression, we employed the  $2^{-\Delta\Delta C_t}$  method, using *e1f2a* expression for normalization.

884

### 885 **Double in situ hybridization and immunohistochemistry on paraffin sections**

886 In situ hybridization on paraffin sections was done as follows: paraffin sections were dewaxed  
887 and rehydrated through a series of ethanol incubations. Sections were then refixed with 4%  
888 PFA at room temperature for 20 min. Afterwards they were washed with PBS and the tissue  
889 was permeabilized by incubating the slides with 10 µg/ml of Protease K, for 10 min. at 37°C.  
890 Afterwards, slides were washed with PBS and briefly refixed with 4% PFA. The tissue was  
891 then incubated for 10 min with triethanolamine 0.1M, pH8 and 0.25% acetic anhydride. After  
892 washing the slides with PBS and RNase free water the slides were incubated for 3 hours with  
893 pre-hybridization buffer (50% formamide, 5X SSC pH 5.5, 0.1X Denhardt's, 0.1% Tween20,  
894 0.1% CHAPs and 0.05mg/ml tRNA), at 65°C. Afterwards, pre-hybridization buffer was replaced  
895 with hybridization buffer (pre-hybridization buffer with mRNA probe). Slides were left to  
896 incubate with hybridization buffer overnight at 65°C. The next day, slides were washed twice  
897 with post-hybridization buffer I (50% formamide, 5X SSC pH 5.5 and 1% SDS) and 2 times  
898 with post-hybridization buffer II (50% formamide, 2X SSC pH 5.5 and 0.2% SDS). Each wash  
899 was done for 30 min at 65°C. Slides were then washed another 3 times with maleic acid buffer  
900 (MABT) and then incubated for 1 hour blocking solution (2% fetal bovine serum, heat  
901 inactivated, and 1% blocking reagent, in MABT). Tissue was incubated overnight at 4°C with  
902 anti-DIG antibody in blocking solution at 1:2000. Finally, sections were thoroughly washed with  
903 MABT and incubated in alkaline phosphatase buffer (AP buffer, NaCl 0.1M, MgCl<sub>2</sub> 0.05M, 10%

904 Tri-HCL pH 9.5). Finally, colorimetric assay was performed using BM purple. After the desired  
905 staining was achieved, slides were washed with PBS and fixed with 4% PFA, before mounting  
906 them with 50% glycerol and imaged using a Zeiss Imager M2, with and Olympus UC50 camera.  
907 After imaging sections were washed and further permeabilized with PBS with 0.5% TritonX-  
908 100. Then they were incubated for 2hours with 5% BSA at room temperature and incubated  
909 with primary antibody, chicken anti-GFP (1:300 in 5% BSA) overnight at 4°C. The next day  
910 slides were washed in PBS-0.1% Tween20 and incubated for one hour at room temperature  
911 with secondary antibody anti-chicken-HRP. Signal was obtained by incubating slides with DAB  
912 solution for 30 seconds at room temperature. The reaction was stopped with water. Slides  
913 were then mounted in 50% glycerol and imaged.

914

#### 915 **Whole mount in situ hybridization**

916 Whole mount in situ hybridization was performed as described (87), with some minor  
917 adaptations. Embryos were selected at 24 hpf and 3 dpf for eGFP expression. After fixation,  
918 the embryos were washed with PBS and gradually dehydrated through a methanol series.  
919 Embryos were stored in 100% methanol for a minimum of 2 hours, at -20°C. Afterwards, the  
920 embryos were rehydrated and permeabilized with proteinase K (10µg/ml in TBST) at 37°C.  
921 Incubation times were adjusted according to the stage of the embryos (24 hpf, 10 min and 72  
922 hpf, 20 min). This was followed by a 20 min incubation in 0.1M triethanolamine (pH 8), with  
923 25µl/ml acetic anhydride.

924 After 4 hours of pre-hybridization, at 68°C, myl7 riboprobe was diluted in pre hybridization  
925 solution, at a concentration of 300ng/ml. The embryos were incubated with the riboprobe  
926 overnight, at 68°C. The following day, the riboprobe was removed and the embryos were  
927 incubated twice for 30 min with post hybridization solution at 68°C. Embryos were then  
928 incubated with blocking buffer, freshly prepared, and afterwards with anti-DIG antibody (in  
929 blocking solution), at 1:4000, overnight, at 4°C.

930 The embryos were then washed extensively with Maleic acid buffer (150mM maleic acid pH  
931 7.5, 300 mM NaCl, 0.1% Tween 20). Finally, the embryos were transferred to a 6-well plate

932 and pre-incubated with AP-buffer (0.1M Tris base pH 9.5, 0.1 M NaCl, 1mM MgCl<sub>2</sub>, 0.1%  
933 Tween 20) and then incubated with BM-purple, at room temperature. As soon as color was  
934 visible in the heart of either group (overexpression or control), the staining was stopped in both  
935 groups by adding TBST and embryos were re-fixed in 4% PFA.

936 Using a microscope, we could obtain pictures of the hearts of the embryos. For image  
937 acquisition, embryos were mounted on 3% methylcellulose for ease of orientation. Embryos  
938 were positioned so that the majority of the heart could be observed in a single plane.

939 Images were acquired with a Nikon SMZ800N stereomicroscope. Illumination conditions and  
940 acquisition parameters were maintained for all embryos.

941

#### 942 **Serial block face scanning electron microscopy**

943 Zebrafish embryos at 5 dpf were killed with an overdose of tricaine and immediately fixed with  
944 2.5% glutaraldehyde with 0.15M cacodylate buffer and 2mM CaCl<sub>2</sub>, pH 7.4. Embryos were  
945 then processed for serial block face scanning electron microscopy as previously described  
946 (88). Briefly we proceed as follows: samples were rinsed 3 times in ice-cold 0.15 M Na-  
947 cacodylate for 5 min. They were then incubated in 0.15 M Na-cacodylate solution containing  
948 2% OsO<sub>4</sub> and 1.5% potassium ferrocyanide for 45 min, at room temperature, and for 15 min  
949 in a water bath, at 50 °C. Samples were rinsed 3 times for 5 min in water. They were then  
950 incubated with 0.64 M pyrogallol for 15 min at room temperature, for 5 min in a water bath at  
951 50 °C, and subsequently rinsed with water. The embryos were incubated in 2% OsO<sub>4</sub> for 22  
952 min at room temperature and 8 min in a water bath at 50°C. Afterwards they were again rinsed  
953 in water (3 times 5 min) and incubated overnight in a solution of 0.15 M gadolinium acetate  
954 (LFG Distribution, Lyon, France) and 0.15 M samarium acetate (LFG Distribution) pH 7.0. The  
955 next day the embryos were rinsed 3×5 min with water and incubated in 1% Walton's lead  
956 aspartate (89) at 60 °C for 30 min, and rinsed with water (3x 5 min).

957 After staining, the samples were dehydrated in a graded ethanol series (20%, 50%, 70%, 90%,  
958 100%, 100%) at 4°C, each step lasting 5 min. They were then infiltrated with Durcupan resin  
959 mixed with ethanol at ratios of 1:3 (v/v), 1:1, and 3:1, each step lasting 2 h. The embryos were

960 left overnight to infiltrate with Durcupan. The next day, samples were transferred to fresh  
961 Durcupan and the resin was polymerized for 3 days at 60 °C. Sample blocks were mounted  
962 on aluminum pins (Gatan, Pleasanton, CA, USA) with a conductive epoxy glue (CW2400,  
963 Circuitworks, Kennesaw, GA, USA). Care was taken to have osmicated material directly  
964 exposed at the block surface in contact with the glue in order to reduce specimen charging  
965 under the electron beam. Pyramids with a surface of approximately 500 × 500 μm<sup>2</sup> were  
966 trimmed with a razor blade.

967 Three-dimensional (3D) ultrastructural images were produced by serial block face scanning  
968 electron microscopy (SBFSEM) on a Quanta FEG 250 SEM (FEI, Eindhoven, The  
969 Netherlands) equipped with a 3View2XP in situ ultramicrotome (Gatan). Images were acquired  
970 in low vacuum mode (40 mPa), except where indicated otherwise. Acceleration voltage was 5  
971 kV and pixel dwell time was set between 2 μs. Image acquisition was done with a back  
972 scattered electron detector optimized for SBFSEM (Gatan). Image stack were aligned,  
973 normalized, and denoised by non-linear anisotropic diffusion in IMOD (90). Each field of view  
974 consisted of 8192 x 8192 pixels with a dimension of 6 nm/pixel in x-y and zz nm in z direction.  
975 Final image montage was done in Fiji.

976

### 977 **FAC sorting**

978 *myl7:Gal;eGFP:UAS:RFP* and *myl7:Gal;eGFP:UAS:wt1b* embryos at 5 dpf were used to  
979 obtain GFP+ heart cells. The heart region of these embryos was manually dissected and  
980 placed in Ringer's solution. Afterwards the tissue was briefly centrifuged in a table top  
981 centrifuge and the Ringer's solution was replaced by a mix of 20mg/ml collagenase in 0.05%  
982 trypsin. The samples were incubated at 32°C for 25 minutes. Every 5 minutes this mixture as  
983 gently mixed. The tissue was visually inspected for dissociation. After cell disaggregation the  
984 reaction was stopped with Hanks's solution (1xHBS, 10mM Hepes and 0.25%BSA). The  
985 homogenized samples were centrifuged at 250g for 10 minutes and re-suspended in Hank's  
986 solution. The cells were then passed through a 40 μm filter, centrifuged again for 10 minutes at  
987 400g and re-suspended in 50 μl of Hank's solution for FAC sorting. Dead cells were marked



988 with 7-aminoactinomycin D (Invitrogen) and discarded. Cells were FAC sorted into Hank's  
989 solution, on a Moflo astrios EQ (Beckman Coulter) and analyzed for forward and side scatter,  
990 as well as eGFP fluorescence. Between 1200 and 1500 cells per sample were sorted for

991

#### 992 **ATAC-seq**

993 FAC sorted GFP<sup>+</sup> cells were gently centrifuged and Hank's solution was replaced by lysis buffer  
994 (10mM tris-HCL, pH 7.4, 10mM NaCl, 3mM MgCl<sub>2</sub>, 0.1% IGEPAL CA-630). Cells were  
995 immediately centrifuged at 500 g for 10minutes at 4°C. The supernatant was discarded and  
996 replaced with the transposition reaction mix (Tn5 in TD buffer) for tagmentation, and incubated  
997 at 37°C for 30min. Afterwards, 500mM of EDTA was used for quenching. The solution was  
998 incubated for 30 minutes at 50°C. MgCl<sub>2</sub> was added to a final concentration of 45mM. Samples  
999 were stored at 4°C before proceeding with PCR amplification. PCR amplification we used  
1000 1.25µl IDT® for Illumina Nextera DNA Unique Dual Indexes Set C, which contains two indexes  
1001 premixed and 25 µL of Bioline MyFi Mix. This is in the place of the NEB Next HiFi PCR mix in  
1002 your protocol. We performed the PCR as outlined. For PCR amplification 15 cycles were used  
1003 due to the reduced amount of material. The amplified library was purified using the Qiagen  
1004 PCR purification MinElute kit. This was followed by a 1 x volume AMPure XP bead-based  
1005 clean-up according to manufacturer's guidelines. The resulting libraries were evaluated for  
1006 quantity and quality using a Thermo Fisher Scientific Qubit 4.0 fluorometer with the Qubit  
1007 dsDNA HS Assay Kit and an Advanced Analytical Fragment Analyzer System using a  
1008 Fragment Analyzer NGS Fragment Kit, respectively.

1009 The ATAC-Seq libraries were further quantified by qPCR using a Bioline JetSeq library  
1010 Quantification Lo-ROX kit according to their guidelines. The libraries were pooled equimolar  
1011 and further cleaned using AMPure XP beads as described above. The library pool was then  
1012 again assessed for quantity and quality using fluorometry and capillary electrophoresis as  
1013 described above.

1014 The pool was loaded at 150pM using an XP workflow into one lane of a NovaSeq 600 SP with  
1015 NovaSeq XP 2-Lane Kit v1.5. The libraries were sequenced paired end on an Illumina

1016 NovaSeq 6000 sequencer using a NovaSeq 6000 SP Reagent Kit v1.5. An average of 56  
1017 million reads/library were obtained. The quality of the sequencing runs was assessed using  
1018 Illumina Sequencing Analysis Viewer and all base call files were demultiplexed and converted  
1019 into FASTQ files using Illumina bcl2fastq conversion software v2.20. ATAC-seq experiments  
1020 were performed in collaboration with the Genomics Unit of the University of Bern.

1021

## 1022 **ATAC-seq Data Analysis**

1023 All bioinformatics analysis were performed using bash scripts or R statistical software. Quality  
1024 check of the samples was performed using FASTQC and reports summarized using MultiQC  
1025 (78, 79). Adapters from the fastq files were trimmed using trimmomatic software (91). Reads  
1026 were aligned using bowtie2 (92, 93) to GRCz11 danRer11 v102 assembly from Ensembl (81)  
1027 with flags `--very-sensitive`. Paired-end reads were used for downstream analysis. The files  
1028 were then converted to bam, downsampled to the lowest counts, indexed and the mitochondrial  
1029 chromosome was removed using samtools (94, 95). Duplicates were removed using Picard  
1030 tools (96). The samples were processed to select for unique reads using samtools (94, 95).  
1031 The peaks were identified using Genrich in ATACSeq mode and zebrafish genome size (97).  
1032 The zebrafish genome size was estimated using faCount script from public utilities from UCSC  
1033 (98).

1034 To analyze the differential accessible regions, we used DiffBind using background and DeSeq2  
1035 normalization and a cutoff threshold of  $p < 0.05$ . To annotate the peaks, we used ChIPSeeker  
1036 (99). We used the GRCz11 danRer11 v102 assembly from Ensembl and transcription start site  
1037 region as +/-1kb for annotation. The annotated genes were then converted to mouse  
1038 orthologous genes using biomaRt and used for pathway analysis using clusterProfiler (100,  
1039 101). K-means clustering was performed using SeqMINER software using linear enrichment  
1040 clustering approach with 10 clusters (102). The bigwig files to visualize the peaks were made  
1041 using bamCoverage in deepTools2 (103). Interactive Genome Viewer was used to visualize  
1042 the peaks (104).

1043 To identify the transcription factor binding cite, we used the sequences from the differential  
1044 accessible regions in Centrimo from MEME-suite. We used CIS-BP 2.0 Danio rerio Database  
1045 to identify the potential zebrafish transcription factors (105, 106).

1046

### 1047 **Embryonic heart function analysis**

1048 Heartbeat analysis was performed by assessing the following parameters: degree of rhythmic  
1049 beating as Root Mean Square of Successive Differences (RMSSD) (107); stroke volume (SV  
1050 - difference between diastolic an systolic volume); ejection fraction (EF - difference between  
1051 diastolic an systolic volume relative to the diastolic size); cardiac output (CO - SV multiplied by  
1052 heart rate); and diastolic volume, and heart rate as described (54).

1053 We recorded 300 frames of the beating heart in the GFP channel in *Tg(myl7:Gal4;*  
1054 *eGFP:UAS:wt1b)* and *Tg(myl7:Gal4; eGFP:UAS:RFP)* at 2 dpf and 5 dpf using the  
1055 fluorescence stereo microscope Nikon SMZ25 (SHR Plan apo 1x objective, 10x zoom,  
1056 2880x2048 pixel, 0.44  $\mu\text{m}/\text{pixel}$ , 17 frames/s).

1057 For the analysis of heart function, we defined the volume of the heart, which is calculated by  
1058 measuring the long diameter ( $D_L$ ) and the short diameter ( $D_S$ ).

$$1059 \text{Volume (nl)} = \frac{1}{6} \times \pi \times D_L \times D_S^2$$

1060 The maximal and minimal volume of the ventricle and atrium were measured, to calculate end-  
1061 diastolic volume (EDV) and end-systolic volume (ESV). The mean EDV and ESV of two heart  
1062 cycles per fish were averaged to calculate the SV.

$$1063 \text{SV (nl/beat)} = \text{EDV} - \text{ESV}$$

1064 The EF was calculated by dividing the SV through the EDV and converted to a percentage.

$$1065 \text{EF (\%)} = \frac{(\text{EDV} - \text{ESV})}{\text{EDV}} \times 100 = \frac{\text{SV}}{\text{EDV}} \times 100$$

1066 We developed the FIJI plugin *Heart beat analysis* to sequentially process all images in a folder  
1067 and guide the user through each manual step of the analysis. The manual steps are to find the  
1068 two diastolic and systolic states of the heart, adjust a line to  $D_L$  and  $D_S$  and to draw one line at  
1069 the border of the ventricle. The plugin *Heart beat analysis* opens subsets of the data (100

1070 frames and only green channel per fish from the *.nd2* RGB file), applies a Gaussian blur filter  
1071 (10 px), indicates which manual step to perform, calculates the HR by detecting maxima in a  
1072 kymograph and subsequently saves all kymograph images as *.tiff*, results as *.csv*, all lines as  
1073 *.zip* in ROI sets.

1074 To calculate the RMSSD we measured the temporal distance between 12-15 cardiac cycles  
1075 using instead of a subset of 100 frames all 300 frames from the above described data. The  
1076 temporal distances between cardiac cycles were measured using the FIJI plugin *RMSSD*  
1077 (107), two line were drawn crossing one side of the cardiac wall of V and AT. Subsequently,  
1078 kymographs were generated. The correctness of detected maxima in the kymograph was  
1079 supervised. All intermediate images and ROIs were saved. The locations of each intensity  
1080 maximum in the kymograph were exported as *.csv*-file. A Jupyter-notebook (108) was created  
1081 to calculate the time between two cardiac cycles ( $R - R_i$ ; time of cardiac cycle,  $R_i$ ; current cycle,  
1082  $i$ ; next cycle,  $i+1$ ) and variability of these time differences between all frames (total frames,  $N$ )  
1083 as RMSSD.

$$1084 \quad RMSSD (ms) = \sqrt{\frac{1}{N-1} \left( \sum_{i=1}^{N-1} ((R - R)_{i+1} - (R - R)_i)^2 \right)}$$

1085

## 1086 **Histological staining**

1087 Hearts were fixed in 2 % paraformaldehyde (PFA) in phosphate-buffered saline (PBS)  
1088 overnight at 4°C. Samples were then washed in PBS, dehydrated through graded alcohols  
1089 (30%, 50%, 70%, 90% and 2 x 100%), and Xylol (2x) and embedded in paraffin wax (3x). All  
1090 steps were done for 20 min. Histological stainings were performed on 8  $\mu$ m paraffin sections  
1091 cut on a microtome (Leica and Reichert-Jung), mounted on Superfrost slides (Fisher  
1092 Scientific), and dried overnight at 37°C. Sections were then dewaxed in Xylol, rehydrated  
1093 through graded ethanol (from 100% to 30%) and then washed in distilled water. Connective  
1094 tissue was stained using Acid Fuchsine Orange G (AFOG) (18).

1095

## 1096 **Micro-computed tomography (microCT)**

1097 For each condition, three adult fish were sacrificed in 0.6 mg/ml tricaine (Sigma-Aldrich).  
1098 Subsequently fish were fixed for 24 hours in 4% paraformaldehyde (PFA), at 4°C. Afterwards,  
1099 the animals were transversally sectioned bellow the pectoral fins and washed in 1X PBS. They  
1100 were then stained in lugol for 24 hours, at room temperature, before being scanned by micro-  
1101 computed tomography. For this, the six samples were imaged on a Bruker SkyScan 1272 high-  
1102 resolution microtomography machine (Bruker microCT, Kontich, Belgium). The X-ray source  
1103 was set to a voltage of 80 kV and a current of 125  $\mu$ A, the x-ray spectrum was shaped by a 1  
1104 mm Al filter prior to incidence onto the sample. For each sample, a set of 948 projections of  
1105 2452 x 1640 pixels at every 0.2° over a 180° sample rotation was recorded. Every single  
1106 projection was exposed for 1593 msec. Three projections were averaged to one to reduce the  
1107 noise. This resulted in a scan time of two hours per sample and an isometric voxel size of 4  
1108  $\mu$ m in the final data sets.

1109 The projection images were then reconstructed into a 3D stack of images with NRecon (Bruker,  
1110 Version: 1.7.0.4). The 3D images were analyzed using Imaris software and Fiji. For the  
1111 analysis, the heart and then the atrium, the ventricle and the bulbus arteriosus were segmented  
1112 and the volume and surface area were obtained. Volume differences between conditions were  
1113 analyzed using GraphPad Prism7.

1114 For 3D reconstructions of microCT images we used the Fiji software (77, 109). We first  
1115 selected the images where the heart was visible and created a z-stack with those images. We  
1116 then proceed to segment three different areas of the heart: the bulbus arteriosus, the atrium  
1117 and the ventricle. We created a mask in every 5<sup>th</sup> z-slice and performed a linear interpolation  
1118 to generate masks for every z-slice. Subsequently, we applied a macro to set all pixels outside  
1119 of the masked volume to zero. We repeated this process for each one of the three heart areas.  
1120 We then attributed a different color to each heart region and merged all three channels. This  
1121 allowed us to represent the segmented parts of the heart and generate a 3D projection (110).  
1122 We also used the individually segmented heart regions to calculate the volume of each heart  
1123 chamber. For this we applied the MorphoLibJ plugin (111).

1124

## 1125 **Imaging and Image processing**

1126 Immunofluorescence images were acquired using the Leica TCS SP8 DLS confocal  
1127 microscopes. For image acquisition of whole mount embryos, larvae were mounted in 1% low  
1128 melting agarose in a MatTek petri dish. Images were acquired with a 20x water immersion  
1129 objective. Images were afterwards processed with Fiji software. Fig legends indicate whether  
1130 a 3D projection is presented or a maximum intensity projection of a reduced number of stacks  
1131 is shown. For 3D projections, images were first treated with a mean filter, with a radius of 2.0  
1132 pixels. Interpolation was also applied when rendering the 3D projections.

1133 To assess the eGFP/mRFP ratio from *in vivo* confocal images, we applied a median filter (3  
1134 pixels radius) and measured line profiles from the SV 60  $\mu\text{m}$  into the atrium in 6 sequential Z-  
1135 planes. The mean intensity along the line profile normalized by the maximum per fluorophore  
1136 per embryo was calculated, subsequently the ratio for each  $\mu\text{m}$  along the line profile was  
1137 obtained.

1138 Imaging of AFOG stained sections was done with the Zeiss Imager M2, using a 10x objective.  
1139 For quantification of mean fluorescence intensity first a mean filter with a radius of 2.0 pixels  
1140 was applied to smoothen the images. Afterwards we did a maximum intensity projection of all  
1141 the stacks containing the heart. We then delimited the heart and applied an automatic OTSU  
1142 threshold. Automatic threshold was evaluated independently for each image, when necessary  
1143 minor adjustments were applied. Finally mean fluorescence intensity was calculated.

1144 Semi-quantification of signal intensity for whole mount *in situ* hybridization was done using Fiji  
1145 software. First the images were inverted, region of interest (ROI) was defined and used for all  
1146 images. For each image mean signal was measured in six independent areas: three in the  
1147 background and three in the stained area. Measurements were averaged and then background  
1148 signal subtracted from the signal measured in the stained area. The fold change was calculated  
1149 and GraphPad was used for statistical analysis.

1150

## 1151 **Statistical Analysis**

1152 Statistical analysis was done with GraphPad Prism 7. When data fitted normality parameters,  
1153 i.e, passed either the D'Agostino-Pearson or the Shapiro-Wilk normality test, an unpaired t-test  
1154 was used. If this was not the case, the Mann-Whitney non-parametric test was used to  
1155 compare differences between conditions. In case a statistically significant difference in the  
1156 standard deviation between conditions was detected, the Unpaired t test with Welch's  
1157 correction was applied. In case of multiple comparisons, a One-Way ANOVA was applied,  
1158 followed by Tukey's multicomparisons test. For each graph, in each Fig, the type of statistical  
1159 test applied is stated in the Fig legend.

1160 The specific test used in each comparison is indicated in the main text or Fig legend. Normal  
1161 distribution was tested to decide if a parametric or non-parametric test needed to be applied.

1162

### 1163 **Data Availability**

1164 Zebrafish line information has been deposited at ZFIN.

1165 SMARTer-seq and ATAC-seq raw data has been deposited in GEO Database with the  
1166 reference GSE179520 and GSE179521 respectively.

1167 **ACKNOWLEDGEMENTS**

1168 We thank Anna Gliwa and Eduardo Diaz for fish husbandry at University of Bern and CNIC,  
1169 respectively. Microscopes supported by the Microscopy Imaging Center (MIC) at University of  
1170 Bern were used. We thank Stephan Müller from the FACSLab of the University of Bern for help  
1171 with FACS. We thank the Genomics Unit from CNIC for help with SMARTer-seq and Pamela  
1172 Nicholson and Cátia Coito, from the Genomics Unit of the University of Bern, for help with  
1173 ATAC-seq. We Thank Didier Stainier for sharing the *Tg(myl7:cdh2-tdTomato)<sup>bns78</sup>* line. NM has  
1174 been funded by SNF grant 320030E-164245 and ERC Consolidator grant 2018 819717. The  
1175 CNIC is supported by the Instituto de Salud Carlos III (ISCIII), the Ministerio de Ciencia e  
1176 Innovación (MCIN) and the Pro CNIC Foundation, and is a Severo Ochoa Center of Excellence  
1177 (SEV-2015-0505). Benoît Zuber is supported by SNF grant 179520 and ERA-NET NEURON  
1178 grant 185536. M.O. was supported by SNF grant PCEFP3\_186993.

1179

1180

1181 **AUTHORS CONTRIBUTION**

1182 I.M. performed most of the experiments, analyzed data, contributed to interpretation of results  
1183 and wrote the manuscript

1184 A.E. contributed to *in vivo* imaging and image processing and quantifications, contributed to  
1185 writing the manuscript and interpretation of results

1186 P.A. performed sequencing analysis, contributed to writing the manuscript and interpretation  
1187 of results

1188 A.V. performed immunofluorescence and helped with embryo dissociation for FACS

1189 T.H. performed qPCR and contributed to other experiments

1190 A.S.-M. generated the *eGFP:UAS:wt1b* line

1191 U.N. generated the *Tg(bactin2:loxP-DsRed2-loxP-eGFP-T2A-wt1a)* line

1192 A.O. performed electron Microscopy imaging and image reconstruction

1193 X.L. contributed to histological staining, sectioning and maintenance of lines

1194 L. A.D. contributed to Smart-Seq



1195 D. H. performed micro-CT imaging and imagine reconstructions  
1196 B. Z. supervised electron Microscopy imaging and image reconstruction  
1197 R. H. supervised micro-CT imaging and imagine reconstructions  
1198 C.T. performed data analysis not included, but with impact to this work  
1199 M.O. provided Fig1 S1 and the interpretation thereof.  
1200 F.S helped with ATACseq generation and interpretation thereof  
1201 C.E. supervised the generation of the *Tg(bactin2:loxP-DsRed2-loxP-eGFP-T2A-wt1a)*  
1202 N.M. conceived the research question to be addressed, contributed to design experiments and  
1203 interpretation of results, wrote the manuscript, and secured funding.

1204

## 1205 REFERENCES

- 1206 1. van der Linde D, Konings EEM, Slager MA, Witsenburg M, Helbing WA, Takkenberg JJM, et al.  
1207 Birth Prevalence of Congenital Heart Disease Worldwide: A Systematic Review and Meta-Analysis.  
1208 Journal of the American College of Cardiology. 2011;58(21):2241-7.  
1209 2. WHO. World Health Organisation 2020 [Available from:  
1210 [https://www.who.int/gho/child\\_health/mortality/causes/en/](https://www.who.int/gho/child_health/mortality/causes/en/).  
1211 3. Eisen JS. The Zebrafish in Biomedical Research.  
1212 Biology, Husbandry, Diseases, and Research Applications. Samuel C. Cartner JSE, Susan C. Farmer,  
1213 Karen J. Guillemin, Michael L. Kent, George E. Sanders, editor: Academic Press; 2020. 718 p.  
1214 4. Stainier DY, Lee RK, Fishman MC. Cardiovascular development in the zebrafish. I. Myocardial  
1215 fate map and heart tube formation. Development (Cambridge, England). 1993;119(1):31-40.  
1216 5. Yelon D, Horne SA, Stainier DYR. Restricted Expression of Cardiac Myosin Genes Reveals  
1217 Regulated Aspects of Heart Tube Assembly in Zebrafish. Developmental Biology. 1999;214(1):23-37.  
1218 6. Yang J, Shih Y-h, Xu X. Understanding Cardiac Sarcomere Assembly With Zebrafish Genetics.  
1219 The Anatomical Record. 2014;297(9):1681-93.  
1220 7. Huang W, Zhang R, Xu X. Myofibrillogenesis in the developing zebrafish heart: A functional  
1221 study of tnnt2. Dev Biol. 2009;331(2):237-49.  
1222 8. Knight HG, Yelon D. Utilizing Zebrafish to Understand Second Heart Field Development. In:  
1223 Nakanishi T, Markwald RR, Baldwin HS, Keller BB, Srivastava D, Yamagishi H, editors. Etiology and  
1224 Morphogenesis of Congenital Heart Disease: From Gene Function and Cellular Interaction to  
1225 Morphology. Tokyo: Springer  
1226 Copyright 2016, The Author(s). 2016. p. 193-9.  
1227 9. Peralta M, Steed E, Harlepp S, González-Rosa Juan M, Monduc F, Ariza-Cosano A, et al.  
1228 Heartbeat-Driven Pericardiac Fluid Forces Contribute to Epicardium Morphogenesis. Current Biology.  
1229 2013;23(18):1726-35.  
1230 10. Serluca FC. Development of the proepicardial organ in the zebrafish. Dev Biol.  
1231 2008;315(1):18-27.  
1232 11. Moore AW, McInnes L, Kreidberg J, Hastie ND, Schedl A. YAC complementation shows a  
1233 requirement for Wt1 in the development of epicardium, adrenal gland and throughout  
1234 nephrogenesis. Development (Cambridge, England). 1999;126(9):1845-57.

- 1235 12. Hastie ND. Wilms' tumour 1 (WT1) in development, homeostasis and disease. *Development*  
1236 (Cambridge, England). 2017;144(16):2862-72.
- 1237 13. van Wijk B, Gunst QD, Moorman AFM, van den Hoff MJB. Cardiac Regeneration from  
1238 Activated Epicardium. *PLOS ONE*. 2012;7(9):e44692.
- 1239 14. Bollig F, Mehringer R, Perner B, Hartung C, Schäfer M, Scharl M, et al. Identification and  
1240 comparative expression analysis of a second wt1 gene in zebrafish. *Developmental Dynamics*.  
1241 2006;235(2):554-61.
- 1242 15. Serluca FC, Fishman MC. Pre-pattern in the pronephric kidney field of zebrafish.  
1243 *Development (Cambridge, England)*. 2001;128(12):2233-41.
- 1244 16. Bollig F, Perner B, Besenbeck B, Köthe S, Ebert C, Taudien S, et al. A highly conserved retinoic  
1245 acid responsive element controls <em>wt1a</em> expression in the zebrafish  
1246 pronephros. *Development (Cambridge, England)*. 2009;136(17):2883.
- 1247 17. Perner B, Englert C, Bollig F. The Wilms tumor genes wt1a and wt1b control different steps  
1248 during formation of the zebrafish pronephros. *Developmental Biology*. 2007;309(1):87-96.
- 1249 18. Peralta M, González-Rosa JM, Marques IJ, Mercader N. The Epicardium in the Embryonic and  
1250 Adult Zebrafish. *J Dev Biol*. 2014;2(2):101-16.
- 1251 19. Andrés-Delgado L, Galardi-Castilla M, Mercader N, Santamaría L. Analysis of wt1a reporter  
1252 line expression levels during proepicardium formation in the zebrafish. *Histology and histopathology*.  
1253 2020;35(9):1035-46.
- 1254 20. Wamstad JA, Alexander JM, Truty RM, Shrikumar A, Li F, Eilertson KE, et al. Dynamic and  
1255 coordinated epigenetic regulation of developmental transitions in the cardiac lineage. *Cell*.  
1256 2012;151(1):206-20.
- 1257 21. Vieira JM, Howard S, Villa del Campo C, Bollini S, Dubé KN, Masters M, et al. BRG1-SWI/SNF-  
1258 dependent regulation of the Wt1 transcriptional landscape mediates epicardial activity during heart  
1259 development and disease. *Nature Communications*. 2017;8(1):16034.
- 1260 22. Kikuchi K, Holdway JE, Werdich AA, Anderson RM, Fang Y, Egnaczyk GF, et al. Primary  
1261 contribution to zebrafish heart regeneration by gata4+ cardiomyocytes. *Nature*. 2010;464(7288):601-  
1262 5.
- 1263 23. Mickoleit M, Schmid B, Weber M, Fahrbach FO, Hombach S, Reischauer S, et al. High-  
1264 resolution reconstruction of the beating zebrafish heart. *Nature Methods*. 2014;11(9):919-22.
- 1265 24. Sanz-Morejon A, Garcia-Redondo AB, Reuter H, Marques IJ, Bates T, Galardi-Castilla M, et al.  
1266 Wilms Tumor 1b Expression Defines a Pro-regenerative Macrophage Subtype and Is Required for  
1267 Organ Regeneration in the Zebrafish. *Cell reports*. 2019;28(5):1296-306.e6.
- 1268 25. Gentile A, Bensimon-Brito A, Priya R, Maischein H-M, Piesker J, Günther S, et al. The EMT  
1269 transcription factor Snai1 maintains myocardial wall integrity by repressing intermediate filament  
1270 gene expression. *bioRxiv*. 2020:2020.12.15.422833.
- 1271 26. Rasouli SJ, El-Brolosy M, Tsedek AT, Bensimon-Brito A, Ghanbari P, Maischein H-M, et al.  
1272 The flow responsive transcription factor Klf2 is required for myocardial wall integrity by modulating  
1273 Fgf signaling. *eLife*. 2018;7:e38889.
- 1274 27. Kikuchi K, Gupta V, Wang J, Holdway JE, Wills AA, Fang Y, et al. tcf21+ epicardial cells adopt  
1275 non-myocardial fates during zebrafish heart development and regeneration. *Development*  
1276 (Cambridge, England). 2011;138(14):2895.
- 1277 28. Sugimoto K, Hui SP, Sheng DZ, Kikuchi K. Dissection of zebrafish shha function using site-  
1278 specific targeting with a Cre-dependent genetic switch. *eLife*. 2017;6:e24635.
- 1279 29. Niederreither K, Vermot J, Schuhbauer B, Chambon P, Dollé P. Embryonic retinoic acid  
1280 synthesis is required for forelimb growth and anteroposterior patterning in the mouse. *Development*  
1281 (Cambridge, England). 2002;129(15):3563.
- 1282 30. Grivas D, González-Rajal Á, Guerrero Rodríguez C, Garcia R, de la Pompa JL. Loss of Caveolin-1  
1283 and caveolae leads to increased cardiac cell stiffness and functional decline of the adult zebrafish  
1284 heart. *Scientific reports*. 2020;10(1):12816.
- 1285 31. Weinberger M, Simoes FC, Patient R, Sauka-Spengler T, Riley PR. Functional Heterogeneity  
1286 within the Developing Zebrafish Epicardium. *Developmental cell*. 2020;52(5):574-90.e6.

- 1287 32. Phillips HM, Rhee HJ, Murdoch JN, Hildreth V, Peat JD, Anderson RH, et al. Disruption of  
1288 Planar Cell Polarity Signaling Results in Congenital Heart Defects and Cardiomyopathy Attributable to  
1289 Early Cardiomyocyte Disorganization. *Circulation Research*. 2007;101(2):137-45.
- 1290 33. Zihni C, Mills C, Matter K, Balda MS. Tight junctions: from simple barriers to multifunctional  
1291 molecular gates. *Nature Reviews Molecular Cell Biology*. 2016;17(9):564-80.
- 1292 34. Stevenson BR, Siliciano JD, Mooseker MS, Goodenough DA. Identification of ZO-1: a high  
1293 molecular weight polypeptide associated with the tight junction (zonula occludens) in a variety of  
1294 epithelia. *The Journal of cell biology*. 1986;103(3):755-66.
- 1295 35. Fukuda R, Gunawan F, Beisaw A, Jimenez-Amilburu V, Maischein H-M, Kostin S, et al.  
1296 Proteolysis regulates cardiomyocyte maturation and tissue integration. *Nature Communications*.  
1297 2017;8(1):14495.
- 1298 36. Sheikh F, Ross RS, Chen J. Cell-cell connection to cardiac disease. *Trends Cardiovasc Med*.  
1299 2009;19(6):182-90.
- 1300 37. Oliviero P, Chassagne C, Salichon N, Corbier A, Hamon G, Marotte F, et al. Expression of  
1301 laminin  $\alpha 2$  chain during normal and pathological growth of myocardium in rat and human.  
1302 *Cardiovascular Research*. 2000;46(2):346-55.
- 1303 38. Wang D, Wang Y, Liu H, Tong C, Ying Q, Sachinidis A, et al. Laminin promotes differentiation  
1304 of rat embryonic stem cells into cardiomyocytes by activating the integrin/FAK/PI3K p85 pathway.  
1305 *Journal of Cellular and Molecular Medicine*. 2019;23(5):3629-40.
- 1306 39. Wang J, Hoshijima M, Lam J, Zhou Z, Jokiel A, Dalton ND, et al. Cardiomyopathy Associated  
1307 with Microcirculation Dysfunction in Laminin  $\alpha 4$  Chain-deficient Mice\*. *Journal of Biological*  
1308 *Chemistry*. 2006;281(1):213-20.
- 1309 40. Yarnitzky T, Volk T. Laminin is required for heart, somatic muscles, and gut development in  
1310 the *Drosophila* embryo. *Dev Biol*. 1995;169(2):609-18.
- 1311 41. Derrick CJ, Pollitt EJG, Uruchurtu ASS, Hussein F, Noël ES. Lamb1a regulates atrial growth by  
1312 limiting excessive, contractility-dependent second heart field addition during zebrafish heart  
1313 development. *bioRxiv*. 2021:2021.03.10.434727.
- 1314 42. Hirata H, Murakami Y, Miyamoto Y, Tosaka M, Inoue K, Nagahashi A, et al. ALCAM (CD166) is  
1315 a surface marker for early murine cardiomyocytes. *Cells, tissues, organs*. 2006;184(3-4):172-80.
- 1316 43. Valente M, Resende TP, Nascimento DS, Burlen-Defranoux O, Soares-da-Silva F, Dupont B, et  
1317 al. Mouse HSA+ immature cardiomyocytes persist in the adult heart and expand after ischemic injury.  
1318 *PLOS Biology*. 2019;17(6):e3000335.
- 1319 44. Costa ML, Escaleira RC, Rodrigues VB, Manasfi M, Mermelstein CS. Some distinctive features  
1320 of zebrafish myogenesis based on unexpected distributions of the muscle cytoskeletal proteins actin,  
1321 myosin, desmin,  $\alpha$ -actinin, troponin and titin. *Mechanisms of Development*. 2002;116(1):95-104.
- 1322 45. Buenrostro JD, Giresi PG, Zaba LC, Chang HY, Greenleaf WJ. Transposition of native chromatin  
1323 for fast and sensitive epigenomic profiling of open chromatin, DNA-binding proteins and nucleosome  
1324 position. *Nature Methods*. 2013;10(12):1213-8.
- 1325 46. Oki S, Ohta T, Shioi G, Hatanaka H, Ogasawara O, Okuda Y, et al. ChIP-Atlas: a data-mining  
1326 suite powered by full integration of public ChIP-seq data. *EMBO reports*. 2018;19(12).
- 1327 47. Assémat E, Bazellières E, Pallesi-Pocachard E, Le Bivic A, Massey-Harroche D. Polarity  
1328 complex proteins. *Biochimica et Biophysica Acta (BBA) - Biomembranes*. 2008;1778(3):614-30.
- 1329 48. Gallagher TL, Arribere JA, Geurts PA, Exner CRT, McDonald KL, Dill KK, et al. Rbfox-regulated  
1330 alternative splicing is critical for zebrafish cardiac and skeletal muscle functions. *Developmental*  
1331 *Biology*. 2011;359(2):251-61.
- 1332 49. King JC, Moskowitz IPG, Burgon PG, Ahmad F, Stone JR, Seidman JG, et al. E2F3 plays an  
1333 essential role in cardiac development and function. *Cell Cycle*. 2008;7(23):3775-80.
- 1334 50. Henry S, Szabó V, Sutus E, Purity MK. RYBP is important for cardiac progenitor cell  
1335 development and sarcomere formation. *PLOS ONE*. 2020;15(7):e0235922.
- 1336 51. Herwig L, Blum Y, Krudewig A, Ellertsdottir E, Lenard A, Belting H-G, et al. Distinct Cellular  
1337 Mechanisms of Blood Vessel Fusion in the Zebrafish Embryo. *Current Biology*. 2011;21(22):1942-8.

- 1338 52. Pestel J, Ramadass R, Gauvrit S, Helker C, Herzog W, Stainier DYR. Real-time 3D visualization  
1339 of cellular rearrangements during cardiac valve formation. *Development (Cambridge, England)*.  
1340 2016;143(12):2217-27.
- 1341 53. DeGroff CG. Doppler echocardiography. *Pediatric cardiology*. 2002;23(3):307-33.
- 1342 54. Yalcin HC, Amindari A, Butcher JT, Althani A, Yacoub M. Heart function and hemodynamic  
1343 analysis for zebrafish embryos. *Developmental Dynamics*. 2017;246(11):868-80.
- 1344 55. Tyser RCV, Ibarra-Soria X, McDole K, Arcot Jayaram S, Godwin J, van den Brand TAH, et al.  
1345 Characterization of a common progenitor pool of the epicardium and myocardium. *Science*.  
1346 2021;371(6533):eabb2986.
- 1347 56. Andrés-Delgado L, Ernst A, Galardi-Castilla M, Bazaga D, Peralta M, Münch J, et al. Actin  
1348 dynamics and the Bmp pathway drive apical extrusion of proepicardial cells. *Development*  
1349 (Cambridge, England). 2019;146(13).
- 1350 57. Martínez-Estrada OM, Lettice LA, Essafi A, Guadix JA, Slight J, Velecela V, et al. Wt1 is  
1351 required for cardiovascular progenitor cell formation through transcriptional control of Snail and E-  
1352 cadherin. *Nature Genetics*. 2010;42(1):89-93.
- 1353 58. von Gise A, Zhou B, Honor LB, Ma Q, Petryk A, Pu WT. WT1 regulates epicardial epithelial to  
1354 mesenchymal transition through  $\beta$ -catenin and retinoic acid signaling pathways. *Developmental*  
1355 *biology*. 2011;356(2):421-31.
- 1356 59. Guadix JA, Ruiz-Villalba A, Lettice L, Velecela V, Muñoz-Chápuli R, Hastie ND, et al. Wt1  
1357 controls retinoic acid signalling in embryonic epicardium through transcriptional activation of Raldh2.  
1358 *Development (Cambridge, England)*. 2011;138(6):1093.
- 1359 60. Rudat C, Kispert A. Wt1 and epicardial fate mapping. *Circ Res*. 2012;111(2):165-9.
- 1360 61. Cano E, Carmona R, Ruiz-Villalba A, Rojas A, Chau YY, Wagner KD, et al. Extracardiac septum  
1361 transversum/proepicardial endothelial cells pattern embryonic coronary arterio-venous connections.  
1362 *Proceedings of the National Academy of Sciences of the United States of America*. 2016;113(3):656-  
1363 61.
- 1364 62. Gentile A, Bensimon-Brito A, Priya R, Maischein HM, Piesker J, Guenther S, et al. The EMT  
1365 transcription factor Snai1 maintains myocardial wall integrity by repressing intermediate filament  
1366 gene expression. *Elife*. 2021;10.
- 1367 63. Smart N, Bollini S, Dubé KN, Vieira JM, Zhou B, Davidson S, et al. De novo cardiomyocytes  
1368 from within the activated adult heart after injury. *Nature*. 2011;474(7353):640-4.
- 1369 64. Zhou B, Ma Q, Rajagopal S, Wu SM, Domian I, Rivera-Feliciano J, et al. Epicardial progenitors  
1370 contribute to the cardiomyocyte lineage in the developing heart. *Nature*. 2008;454(7200):109-13.
- 1371 65. Dorn T, Kornherr J, Parrotta EI, Zawada D, Ayetey H, Santamaria G, et al. Interplay of cell-cell  
1372 contacts and RhoA/MRTF-A signaling regulates cardiomyocyte identity. *The EMBO journal*.  
1373 2018;37(12).
- 1374 66. Zangi L, Oliveira MS, Ye LY, Ma Q, Sultana N, Hadas Y, et al. Insulin-Like Growth Factor 1  
1375 Receptor-Dependent Pathway Drives Epicardial Adipose Tissue Formation After Myocardial Injury.  
1376 *Circulation*. 2017;135(1):59-72.
- 1377 67. De Jong AM, Maass AH, Oberdorf-Maass SU, Van Veldhuisen DJ, Van Gilst WH, Van Gelder IC.  
1378 Mechanisms of atrial structural changes caused by stretch occurring before and during early atrial  
1379 fibrillation. *Cardiovascular Research*. 2010;89(4):754-65.
- 1380 68. Miyagawa K, Kent J, Moore A, Charliou JP, Little MH, Williamson KA, et al. Loss of WT1  
1381 function leads to ectopic myogenesis in Wilms' tumour. *Nat Genet*. 1998;18(1):15-7.
- 1382 69. Wagner N, Ninkov M, Vukolic A, Cubukcuoglu Deniz G, Rassoulzadegan M, Michiels J-F, et al.  
1383 Implications of the Wilms' Tumor Suppressor Wt1 in Cardiomyocyte Differentiation. *International*  
1384 *Journal of Molecular Sciences*. 2021;22(9).
- 1385 70. Rohr S, Otten C, Abdelilah-Seyfried S. Asymmetric Involution of the Myocardial Field Drives  
1386 Heart Tube Formation in Zebrafish. *Circulation Research*. 2008;102(2):e12-e9.
- 1387 71. Mosimann C, Kaufman CK, Li P, Pugach EK, Tamplin OJ, Zon LI. Ubiquitous transgene  
1388 expression and Cre-based recombination driven by the ubiquitin promoter in zebrafish. *Development*  
1389 (Cambridge, England). 2011;138(1):169-77.

- 1390 72. Hans S, Kaslin J, Freudenreich D, Brand M. Temporally-controlled site-specific recombination  
1391 in zebrafish. *PLoS One*. 2009;4(2):e4640.
- 1392 73. Felker A, Nieuwenhuize S, Dolbois A, Blazkova K, Hess C, Low LW, et al. In Vivo Performance  
1393 and Properties of Tamoxifen Metabolites for CreERT2 Control. *PLoS One*. 2016;11(4):e0152989.
- 1394 74. Liebling M, Forouhar AS, Gharib M, Fraser SE, Dickinson ME. Four-dimensional cardiac  
1395 imaging in living embryos via postacquisition synchronization of nongated slice sequences. *Journal of*  
1396 *biomedical optics*. 2005;10(5):054001.
- 1397 75. Liebling M, Forouhar AS, Wolleschensky R, Zimmermann B, Ankerhold R, Fraser SE, et al.  
1398 Rapid three-dimensional imaging and analysis of the beating embryonic heart reveals functional  
1399 changes during development. *Developmental dynamics : an official publication of the American*  
1400 *Association of Anatomists*. 2006;235(11):2940-8.
- 1401 76. Ohn J, Tsai HJ, Liebling M. Joint dynamic imaging of morphogenesis and function in the  
1402 developing heart. *Organogenesis*. 2009;5(4):248-55.
- 1403 77. Schindelin J, Arganda-Carreras I, Frise E, Kaynig V, Longair M, Pietzsch T, et al. Fiji: an open-  
1404 source platform for biological-image analysis. *Nature Methods*. 2012;9(7):676-82.
- 1405 78. Andrew S. FASTQC. A quality control tool for high throughput sequence data. 2010 [Available  
1406 from: <http://www.bioinformatics.babraham.ac.uk/projects/fastqc>.
- 1407 79. Ewels P, Magnusson M, Lundin S, Källér M. MultiQC: summarize analysis results for multiple  
1408 tools and samples in a single report. *Bioinformatics*. 2016;32(19):3047-8.
- 1409 80. Chen D, Zhang Z, Chen C, Yao S, Yang Q, Li F, et al. Deletion of Gtpbp3 in zebrafish revealed  
1410 the hypertrophic cardiomyopathy manifested by aberrant mitochondrial tRNA metabolism. *Nucleic*  
1411 *acids research*. 2019;47(10):5341-55.
- 1412 81. Yates AD, Achuthan P, Akanni W, Allen J, Allen J, Alvarez-Jarreta J, et al. Ensembl 2020.  
1413 *Nucleic acids research*. 2020;48(D1):D682-D8.
- 1414 82. Liao Y, Smyth GK, Shi W. featureCounts: an efficient general purpose program for assigning  
1415 sequence reads to genomic features. *Bioinformatics*. 2014;30(7):923-30.
- 1416 83. Love MI, Huber W, Anders S. Moderated estimation of fold change and dispersion for RNA-  
1417 seq data with DESeq2. *Genome Biology*. 2014;15(12):550.
- 1418 84. Stephens M. False discovery rates: a new deal. *Biostatistics*. 2017;18(2):275-94.
- 1419 85. Wickham H, Navarro, D., Pederson TL. ggplot2: elegant graphics for data analysis: Springer;  
1420 2016.
- 1421 86. Gonzalez-Rosa JM, Martin V, Peralta M, Torres M, Mercader N. Extensive scar formation and  
1422 regression during heart regeneration after cryoinjury in zebrafish. *Development (Cambridge,*  
1423 *England)*. 2011;138(9):1663-74.
- 1424 87. Woltering JM, Vonk FJ, Müller H, Bardine N, Tudu IL, de Bakker MAG, et al. Axial patterning  
1425 in snakes and caecilians: Evidence for an alternative interpretation of the Hox code. *Developmental*  
1426 *Biology*. 2009;332(1):82-9.
- 1427 88. Odriozola A, Llodrá J, Radecke J, Ruegsegger C, Tschanz S, Saxena S, et al. High contrast  
1428 staining for serial block face scanning electron microscopy without uranyl acetate. *bioRxiv*.  
1429 2017:207472.
- 1430 89. Walton J. Lead aspartate, an en bloc contrast stain particularly useful for ultrastructural  
1431 enzymology. *Journal of Histochemistry & Cytochemistry*. 1979;27(10):1337-42.
- 1432 90. Kremer JR, Mastronarde DN, McIntosh JR. Computer Visualization of Three-Dimensional  
1433 Image Data Using IMOD. *Journal of Structural Biology*. 1996;116(1):71-6.
- 1434 91. Bolger AM, Lohse M, Usadel B. Trimmomatic: a flexible trimmer for Illumina sequence data.  
1435 *Bioinformatics*. 2014;30(15):2114-20.
- 1436 92. Langmead B, Salzberg SL. Fast gapped-read alignment with Bowtie 2. *Nature Methods*.  
1437 2012;9(4):357-9.
- 1438 93. Langmead B, Wilks C, Antonescu V, Charles R. Scaling read aligners to hundreds of threads on  
1439 general-purpose processors. *Bioinformatics*. 2019;35(3):421-32.
- 1440 94. Li H, Handsaker B, Wysoker A, Fennell T, Ruan J, Homer N, et al. The Sequence  
1441 Alignment/Map format and SAMtools. *Bioinformatics*. 2009;25(16):2078-9.

- 1442 95. Danecek P, Bonfield JK, Liddle J, Marshall J, Ohan V, Pollard MO, et al. Twelve years of  
1443 SAMtools and BCFtools. *GigaScience*. 2021;10(2).
- 1444 96. Picard toolkit: Broad Institute; 2019 [Available from: <http://broadinstitute.github.io/picard/>].
- 1445 97. Gaspar JM. Genrich: Detecting Sites of Genomic Enrichment. GitHub repository. : GitHub;  
1446 2018 [Available from: <https://github.com/jsh58/Genrich>].
- 1447 98. Kent WJ, Sugnet CW, Furey TS, Roskin KM, Pringle TH, Zahler AM, et al. The Human Genome  
1448 Browser at UCSC. *Genome Research*. 2002;12(6):996-1006.
- 1449 99. Yu G, Wang L-G, He Q-Y. ChIPseeker: an R/Bioconductor package for ChIP peak annotation,  
1450 comparison and visualization. *Bioinformatics*. 2015;31(14):2382-3.
- 1451 100. Yu G, Wang L-G, Han Y, He Q-Y. clusterProfiler: an R Package for Comparing Biological  
1452 Themes Among Gene Clusters. *OMICS: A Journal of Integrative Biology*. 2012;16(5):284-7.
- 1453 101. Durinck S, Spellman PT, Birney E, Huber W. Mapping identifiers for the integration of  
1454 genomic datasets with the R/Bioconductor package biomaRt. *Nature Protocols*. 2009;4(8):1184-91.
- 1455 102. Ye T, Krebs AR, Choukallah M-A, Keime C, Plewniak F, Davidson I, et al. seqMINER: an  
1456 integrated ChIP-seq data interpretation platform. *Nucleic acids research*. 2011;39(6):e35-e.
- 1457 103. Ramírez F, Ryan DP, Grüning B, Bhardwaj V, Kilpert F, Richter AS, et al. deepTools2: a next  
1458 generation web server for deep-sequencing data analysis. *Nucleic acids research*.  
1459 2016;44(W1):W160-W5.
- 1460 104. Robinson JT, Thorvaldsdóttir H, Winckler W, Guttman M, Lander ES, Getz G, et al. Integrative  
1461 genomics viewer. *Nature Biotechnology*. 2011;29(1):24-6.
- 1462 105. Weirauch Matthew T, Yang A, Albu M, Cote AG, Montenegro-Montero A, Drewe P, et al.  
1463 Determination and Inference of Eukaryotic Transcription Factor Sequence Specificity. *Cell*.  
1464 2014;158(6):1431-43.
- 1465 106. Bailey TL, Machanick P. Inferring direct DNA binding from ChIP-seq. *Nucleic acids research*.  
1466 2012;40(17):e128-e.
- 1467 107. Collins MM, Ahlberg G, Hansen CV, Guenther S, Marín-Juez R, Sokol AM, et al. Early  
1468 sarcomere and metabolic defects in a zebrafish *pitx2c*; cardiac arrhythmia  
1469 model. *Proceedings of the National Academy of Sciences*. 2019;116(48):24115.
- 1470 108. Kluyver T, Ragan-Kelley B, Pérez F, Granger B, Bussonnier M, Frederic J, et al. Jupyter  
1471 Notebooks – a publishing format for reproducible computational workflows. In: Loizides F, Schmidt B,  
1472 editors. 20th International Conference on Electronic Publishing (01/01/16): IOS Press; 2016. p. 87-90.
- 1473 109. Cardona A, Tomancak P. Current challenges in open-source bioimage informatics. *Nat*  
1474 *Methods*. 2012;9(7):661-5.
- 1475 110. Schmid B, Schindelin J, Cardona A, Longair M, Heisenberg M. A high-level 3D visualization API  
1476 for Java and ImageJ. *BMC Bioinformatics*. 2010;11(1):274.
- 1477 111. Legland D, Arganda-Carreras I, Andrey P. MorphoLibJ: integrated library and plugins for  
1478 mathematical morphology with ImageJ. *Bioinformatics*. 2016;32(22):3532-4.

1479

1480

1481 **CAPTATION SUPPORTING FILES**

1482

1483 **S1 Fig. Transcript and histone modification signatures at the *Wt1* locus during *in vitro***  
1484 **differentiation of mouse embryonic stem cells into cardiomyocytes**

1485 UCSC browser window depicting the *Wt1* locus and associated transcriptomic and epigenomic  
1486 signatures in mouse embryonic stem cells (mESC), mesodermal progenitors (M), cardiac  
1487 precursors (CP) and cardiomyocytes (CM), as published previously (20). Tracks of activating  
1488 H3K27ac and repressive H3K27me3 marks are shown and co-localizing elements with  
1489 previously validated epicardial enhancer activities 4kb and 5.8kb downstream of the *Wt1*  
1490 transcriptional start site (TSS) are indicated (21). Shown tracks represent the sum of the tracks  
1491 for the different samples, for each type of cell. Mammal conservation is illustrated by the  
1492 Placental Mammal base wise conservation track by PhyloP.

1493

1494 **S2 Fig. Validation of the *wt1a* and *wt1b* overexpression lines**

1495 (A) Schematic representation of the time points during which 4-Hydroxytamoxifen (4-OHT) was  
1496 administered to *myl7:CreERT2;β-actin:loxP-DsRed-loxP-eGFP-T2A-wt1a* fish (in short  
1497 *myl7:CreERT2,eGFP-T2A-wt1a*).

1498 (B-E) qRT-PCR for *GFP* (B,D) and *wt1a* (C,E) on adult heart cDNA from *myl7:CreERT2, eGFP-*  
1499 *T2A-wt1a* with and without 4-OHT. qRT-PCR was performed on cDNA obtained from the  
1500 atrium (B,C) and (D,E) ventricles. Points represent biological replicates, 3 for each group.  
1501 Statistical significance was calculated using one-way ANOVA. Shown are means ±SD.

1502 (F) Schematic representation of lines used and the time at which RNA was extracted.

1503 (G-H) qRT-PCR for *eGFP* (G) and *wt1b* (H) in *eGFP:UAS:wt1b* and  
1504 *myl7:Gal4;eGFP:UAS:wt1b* hearts at 40 days post fertilization (dpf). The points represent  
1505 biological replicates. Statistical significance was calculated with an unpaired t-test. Shown are  
1506 also means ±SD.

1507

1508 **S3 Fig. Overexpression of *tcf21* transcription factor in cardiomyocytes and *wt1b* in non-**  
1509 **cardiomyocytes does not affect heart development.**

1510 (A) Schematic representation of the lines used and embryo orientation for imaging.  
1511 (B-G'') Immunofluorescence against GFP and myosin heavy chain (MHC) on  
1512 *myl7:Gal4;eGFP:UAS:wt1b*, *myl7:Gal4;eGFP:UAS:tcf21*, *fli1a:Gal4;eGFP:UAS:wt1b* and  
1513 *nfatc1:Gal4;eGFP:UAS:wt1b* zebrafish embryos, at 3 or 5 days post fertilization (dpf). (B-B'')  
1514 Shown are 3D projections of a *myl7:Gal4;eGFP:UAS:wt1b* heart in a ventral view, at 5 dpf.  
1515 (B'-B'') show single channels for GFP and MHC. The box highlights a zoomed region in the  
1516 heart where a cluster of delaminating cells can be seen. (B'') Note the absence of MHC in the  
1517 delaminated cells. (C-D'') Shown are 3D projections of a *myl7:Gal4;eGFP:UAS:tcf21* heart in  
1518 a ventral view, at 5 dpf. (C-C'') show single channels for GFP and MHC. The box highlights a  
1519 zoomed region in the heart with one cell delaminating. Note in C'' that the delaminating cell  
1520 preserved MHC expression. (E-E'') Shown are maximum intensity projections of 5 stacks with  
1521 a distance of 1.5  $\mu\text{m}$  between two consecutive optical sections of the heart region of a  
1522 *nfatc1:Gal4;eGFP:UAS:wt1b* heart in a ventral view, at 5 dpf. GFP expression is observed in  
1523 the valve region. The amount of embryos with delaminating cells is indicates in the panels.  
1524 Green, GFP; magenta, MHC. Scale bar 50  $\mu\text{m}$  and 10  $\mu\text{m}$ , in the zoom boxes .at, atrium; v,  
1525 ventricle.

1526

1527 **S4 Fig. *wt1a* overexpression in cardiomyocytes express epicardial markers in the adult**  
1528 **heart**

1529 (A) Schematic representation of the time points during which 4-hydroxytamoxifen (4-OHT) was  
1530 administered to *myl7:CreERT2; $\beta$ -actin:loxP-DsRed-loxP-eeGFP-T2A-wt1a* fish (in short  
1531 *myl7:CreERT2,eeGFP-T2A-wt1a*).  
1532 (B-E') *in situ* mRNA hybridization against *tgm2b* and immunohistochemistry against eGFP on  
1533 paraffin sections of *myl7:CreERT2,eeGFP-T2A-wt1a* (B-C') and *myl7:CreERT2,eeGFP-T2A-*  
1534 *wt1a* + 4-OHT (D-E') adult hearts. (B,C,D and E) Images of sections after *in situ* mRNA  
1535 hybridization against the epicardial marker *tgm2b*. (B', C', D' and E'), same section as in B, C,



1536 D and E, after eGFP immunohistochemistry. Black arrows in E and E' indicate double positive  
1537 cells for *tgm2b* and eGFP.

1538 Scale bars: 200  $\mu\text{m}$  (B,B',D and D'), 50  $\mu\text{m}$  (C,C',E and E').

1539

1540 **S5 Fig. Gene Ontology pathways of differential accessible regions for WT1 motif**  
1541 **enriched peaks**

1542 Gene Ontology (GO) pathways enrichment for differential accessible regions that contain the  
1543 WT1 motif. Shown are the top 25 Biological, Cellular Components and the Molecular Function  
1544 pathways.

1545

1546 **S6 Fig. Heart looping and function are is impaired upon overexpression of wt1b in**  
1547 **cardiomyocytes.**

1548 (A) Schematic representation of the lines used and embryo positioning for image acquisition.

1549 (B-C) Time lapse images of heart looping in (B) *myl7:Gal4;eGFP:UAS:RFP* and (C) *myl7:Gal4;*  
1550 *eGFP:UAS:wt1b* embryos between 2 and 3 days post-fertilization (dpf). Elapsed time since  
1551 initial acquisition is stamped in each panel. Shown are ventral views with the head to the top.

1552 (D) Schematic representation of calculation of heart looping.

1553 (E) Quantification of the looping angle between the ventricle and the atrium at 5 dpf. Statistical  
1554 significance calculated with unpaired t-test, with Welch's correction. Each point represents one  
1555 heart. Shown are means  $\pm$ SD.

1556 (F) Schematic representation of parameters used to determine cardiac function in  
1557 *myl7:Gal4;eGFP:UAS:RFP* and *myl7:Gal4; eGFP:UAS:wt1b*.

1558 (G) Quantification of ventricular stroke volume at 2 days post fertilization (dpf) and 5 dpf.  
1559 Statistical significance was calculated with the Mann-Whitney test.

1560 (H) Quantification of the heart rate at 2 dpf and 5 dpf. Statistical significance calculated with  
1561 an unpaired t-test.

1562 (I) Quantification of ventricular ejection fraction at 2 dpf and 5 dpf. Statistical significance was  
1563 calculated with an unpaired t-test for the comparison between groups in the atrium and in the

1564 ventricle at 2 dpf. Mann-Whitney test was applied to calculate the statistical significance  
1565 between the groups in the ventricle, at 5 dpf.

1566 In all graphs each point represents one embryo. Shown are also means  $\pm$ SD.

1567 Scale bars, 50  $\mu$ m. at, atrium; v, ventricle.

1568

1569 **S7 Fig. Morphological changes due to *wt1* overexpression in cardiomyocytes are**  
1570 **sustained in larval and adult hearts.**

1571 (A) Schematic representation of the lines used and the developmental stages at which hearts  
1572 were analyzed.

1573 (B) 40 day post fertilization (dpf) juvenile *myl7:Gal4:eGFP:UAS:RFP* fish. (C) 40 dpf juvenile  
1574 *myl7:Gal4:eGFP:UAS:wt1b* fish. Arrow points to pericardial edema.

1575 (D-D') Dissected heart of a *myl7:Gal4:eGFP:UAS:RFP* and (E-E') *myl7:Gal4:eGFP:UAS:wt1b*  
1576 fish at 40 dpf. Note the enlarged and dysmorphic atrium.

1577 (F-F') Midline section of a *myl7:Gal4:eGFP:UAS:RFP* and (G-G') *myl7:Gal4:eGFP:UAS:wt1b*  
1578 fish heart at 40 dpf. Note the high degree of myocardial tissue within the atrium of the  
1579 *myl7:Gal4:eGFP:UAS:wt1b* heart.

1580 (H-M) AFOG staining on paraffin sections of *myl7:CreERT2,eGFP-T2A-wt1a* hearts non-  
1581 recombined (H-J) or recombined (+ 4-OHT during embryogenesis) (K-M). (H) Whole heart  
1582 section. (K) ventricle. (K') corresponding atrium from the same animal. (I, J, L and M) Zoomed  
1583 views of boxed areas in H and K.

1584 (N-Q'') Immunofluorescence against GFP (green), MHC (white) and Col1a1 (magenta) on adult  
1585 atria cryosections of non-recombined (N-O'') and embryonically recombined (+4-OHT)  
1586 *myl7:CreERT2,eGFP-T2A-wt1a* fish (P-Q''). (O-O'') Enlarged image of the boxed area in N. In  
1587 *myl7:CreERT2,eGFP-T2A-wt1a* non recombined atria, Col1a1 staining is delimited to the  
1588 valves and no GFP signal is detected. (Q-Q'') Enlarged image of the boxed area in P. In  
1589 recombined *myl7:CreERT2,eGFP-T2A-wt1a* atria, Col1a1 staining is visible in myocardial  
1590 areas close to GFP-positive cells.

1591 Scale bar: 1 mm (B and C); 500  $\mu\text{m}$  (F-H and K); 200  $\mu\text{m}$  (D-E', I, J, L, M-N'' and P-P'''); 10  $\mu\text{m}$   
1592 (O-O'' and Q-Q''').

1593 at, atrium; v, ventricle; ba, bulbus arteriosus.

1594

1595 **S1 Video. *epi:eGFP*-positive cells at the venous pole switch off GFP expression and**  
1596 **start expressing *myl7:mRFP* when entering the heart tube.**

1597 *In vivo* time-lapse imaging of a *epi:GFP;myl7:mRFP* heart between 52 hpf and 68 hpf. The  
1598 yellow arrow highlights a cell that initially is only GFP positive and latter stops expressing GFP  
1599 and starts to express RFP. The cyan arrows point to cardiomyocytes in the heart tube that are  
1600 still GFP -positive at the beginning of the video and then loose GFP signal concomitant with  
1601 increase in mRFP signal intensity. Images were acquired with the Leica TCS SP8 DLS. Shown  
1602 is a single plane reconstruction of the beating. Scale bar, 50  $\mu\text{m}$ .

1603

1604 **S2 Video. Apical delamination of a *wt1b*-overexpressing cardiomyocyte in a cardiac**  
1605 **ventricle at 2 dpf.**

1606 *In vivo* time-lapse imaging of a *myl7:Gal4;eGFP:UAS:RFP* and a *myl7:Gal4;eGFP:UAS:wt1b*  
1607 heart between 2 and 3 days post fertilization (dpf) acquired with the Leica TCS SP8 DLS  
1608 confocal microscope, using the digital light sheet (DLS) mode. Shown is the reconstruction of  
1609 a single plane of the beating ventricle. Note the rounded cells extruding from the ventricle in  
1610 the *myl7:Gal4;eGFP:UAS:wt1b* heart (right panel, arrow). Scale bar, 50  $\mu\text{m}$ .

1611

1612 **S3 Video. Apical delamination of a *wt1b*-overexpressing cardiomyocyte in a cardiac**  
1613 **ventricle at 5 dpf.**

1614 *In vivo* time-lapse imaging of a *myl7:Gal4;eGFP:UAS:wt1b* heart between 5 and 6 days post  
1615 fertilization (dpf) acquired with the Leica TCS SP8 DLS confocal microscope, using the digital  
1616 light sheet (DLS) mode. Shown is the reconstruction of a single plane of the beating ventricle.  
1617 Note how the extruded cells flatten down during the time course of the video (Yellow arrow).  
1618 Scale bar, 50  $\mu\text{m}$ .

1619

1620 **S4 Video. Serial block face scanning z-stacks through a control zebrafish heart at 5 dpf.**

1621 Serial stacks through a ventricle from a *myl7:Gal4;eGFP:UAS:RFP* control embryo at 5 dpf.

1622 Images were obtained by serial block face scanning electron microscopy. Note the compact

1623 organization of the myocardium and the close connection between the myocardium and the

1624 endocardium, and how the sarcomeres form a continuous structure between adjacent

1625 cardiomyocytes. Of remark is also the dense border between the myocardium and epicardium.

1626 EpC, epicardial cell, EnC, endothelial cell, Ery, erythrocyte, CM, cardiomyocyte nuclei. Scale

1627 bar 10  $\mu$ m.

1628

1629 **S5 Video. Zoomed view of a serial block face scanning z-stacks through a control**  
1630 **zebrafish heart at 5 dpf.**

1631 Serial stacks through a ventricle from a *myl7:Gal4;eGFP:UAS:RFP* control embryo at 5 dpf.

1632 Images were obtained by serial block face scanning electron microscopy. Shown is a

1633 magnification of the myocardium in a region where sarcomeres can be observed. Note the

1634 clearly marked z-lines and the longitudinal continuity of the sarcomeres between adjacent

1635 cardiomyocytes. Scale bar, 500 nm.

1636

1637 **S6 Video. Serial block face scanning z-stacks through a *wt1b*-overexpressing heart at 5**  
1638 **dpf.**

1639 Serial stacks through a ventricle from a *myl7:Gal4;eGFP:UAS:wt1b* embryo at 5 dpf. Images

1640 were obtained by serial block face scanning electron microscopy. Note the absence of a

1641 compact and organized myocardial layer and the enlarged cardiac jelly separating the

1642 endocardium and the myocardium. Also visible the extensive areas filled with extracellular

1643 matrix. EpC, epicardial cell, EnC, endothelial cell, Ery, erythrocyte, CM, cardiomyocyte, ECM,

1644 extracellular matrix, v, ventricle, at, atrium. Scale bar, 20  $\mu$ m.

1645

1646 **S7 Video. Zoomed view of a serial block face scanning z-stacks through a *wt1b*-**  
1647 **overexpressing heart at 5 dpf.**

1648 Serial stacks through a ventricle from a *myl7:Gal4;eGFP:UAS:wt1b* embryo at 5 dpf. Images  
1649 were obtained by serial block face scanning electron microscopy. Shown here is a  
1650 magnification of the myocardium in a region where sarcomeres can be observed. Note the z-  
1651 lines. Remarkable is the disorganized arrangement of the sarcomeres between adjacent  
1652 cardiomyocytes. Scale bar, 500 nm.

1653

1654 **S8 Video. Heart looping is impaired in *wt1b*-overexpression hearts.**

1655 *In vivo* time-lapse imaging of a *myl7:Gal4;eGFP:UAS:RFP* and *myl7:Gal4;eGFP:UAS:wt1b*  
1656 heart between 2 and 3 days post fertilization. Images were acquired with the Leica TCS SP8  
1657 DLS. Shown is a full 3D reconstruction of the beating heart through the looping process. Scale  
1658 bar, 50  $\mu\text{m}$ .

1659

1660 **S9 Video. z-stack through micro-computed tomography ( $\mu\text{CT}$ ) acquisition of a**  
1661 ***myl7:CreERT2;eGFP-T2A-wt1a* heart.**

1662 Serial stack of a *myl7:CreERT2;eGFP-T2A-wt1a* heart obtained with a  $\mu\text{CT}$  scan of an adult  
1663 thoracic cavity, used to evaluate the volume of the chambers of the heart. Marked are the  
1664 bulbus arteriosus (ba), the ventricle (v) and the atrium (at). Scale bar, 500  $\mu\text{m}$ .

1665

1666 **S10 Video. z-stack through micro-computed tomography ( $\mu\text{CT}$ ) acquisition of a**  
1667 ***myl7:CreERT2;eGFP-T2A-wt1a* heart recombined during embryogenesis.**

1668 Serial stack of a *myl7:CreERT2;eGFP-T2A-wt1a* heart recombined between 24 hours post  
1669 fertilization (hpf) and 4 days post fertilization (dpf), obtained with a  $\mu\text{CT}$  scan of an adult thorax,  
1670 used to evaluate the volume of the chambers of the heart. Marked are the bulbus arteriosus  
1671 (ba), the ventricle (v) and the atrium (at). Scale bar, 500  $\mu\text{m}$ .

1672

1673 **S1 Data. Differential Peak Calling.**

1674 The file contains about genomic location and information on fold change and significance  
1675 values of the differential peaks. Columns J-O indicate in which samples peaks were identified  
1676 (+) or not (-).

1677

1678 **S2 Data. Gene Ontology.**

1679 Full list of pathways and genes enriched in each of them.

1680

1681 **S3 Data. Annotation of differential peaks.**

1682 Differential peaks with their associated genes and genomic region classification.

1683

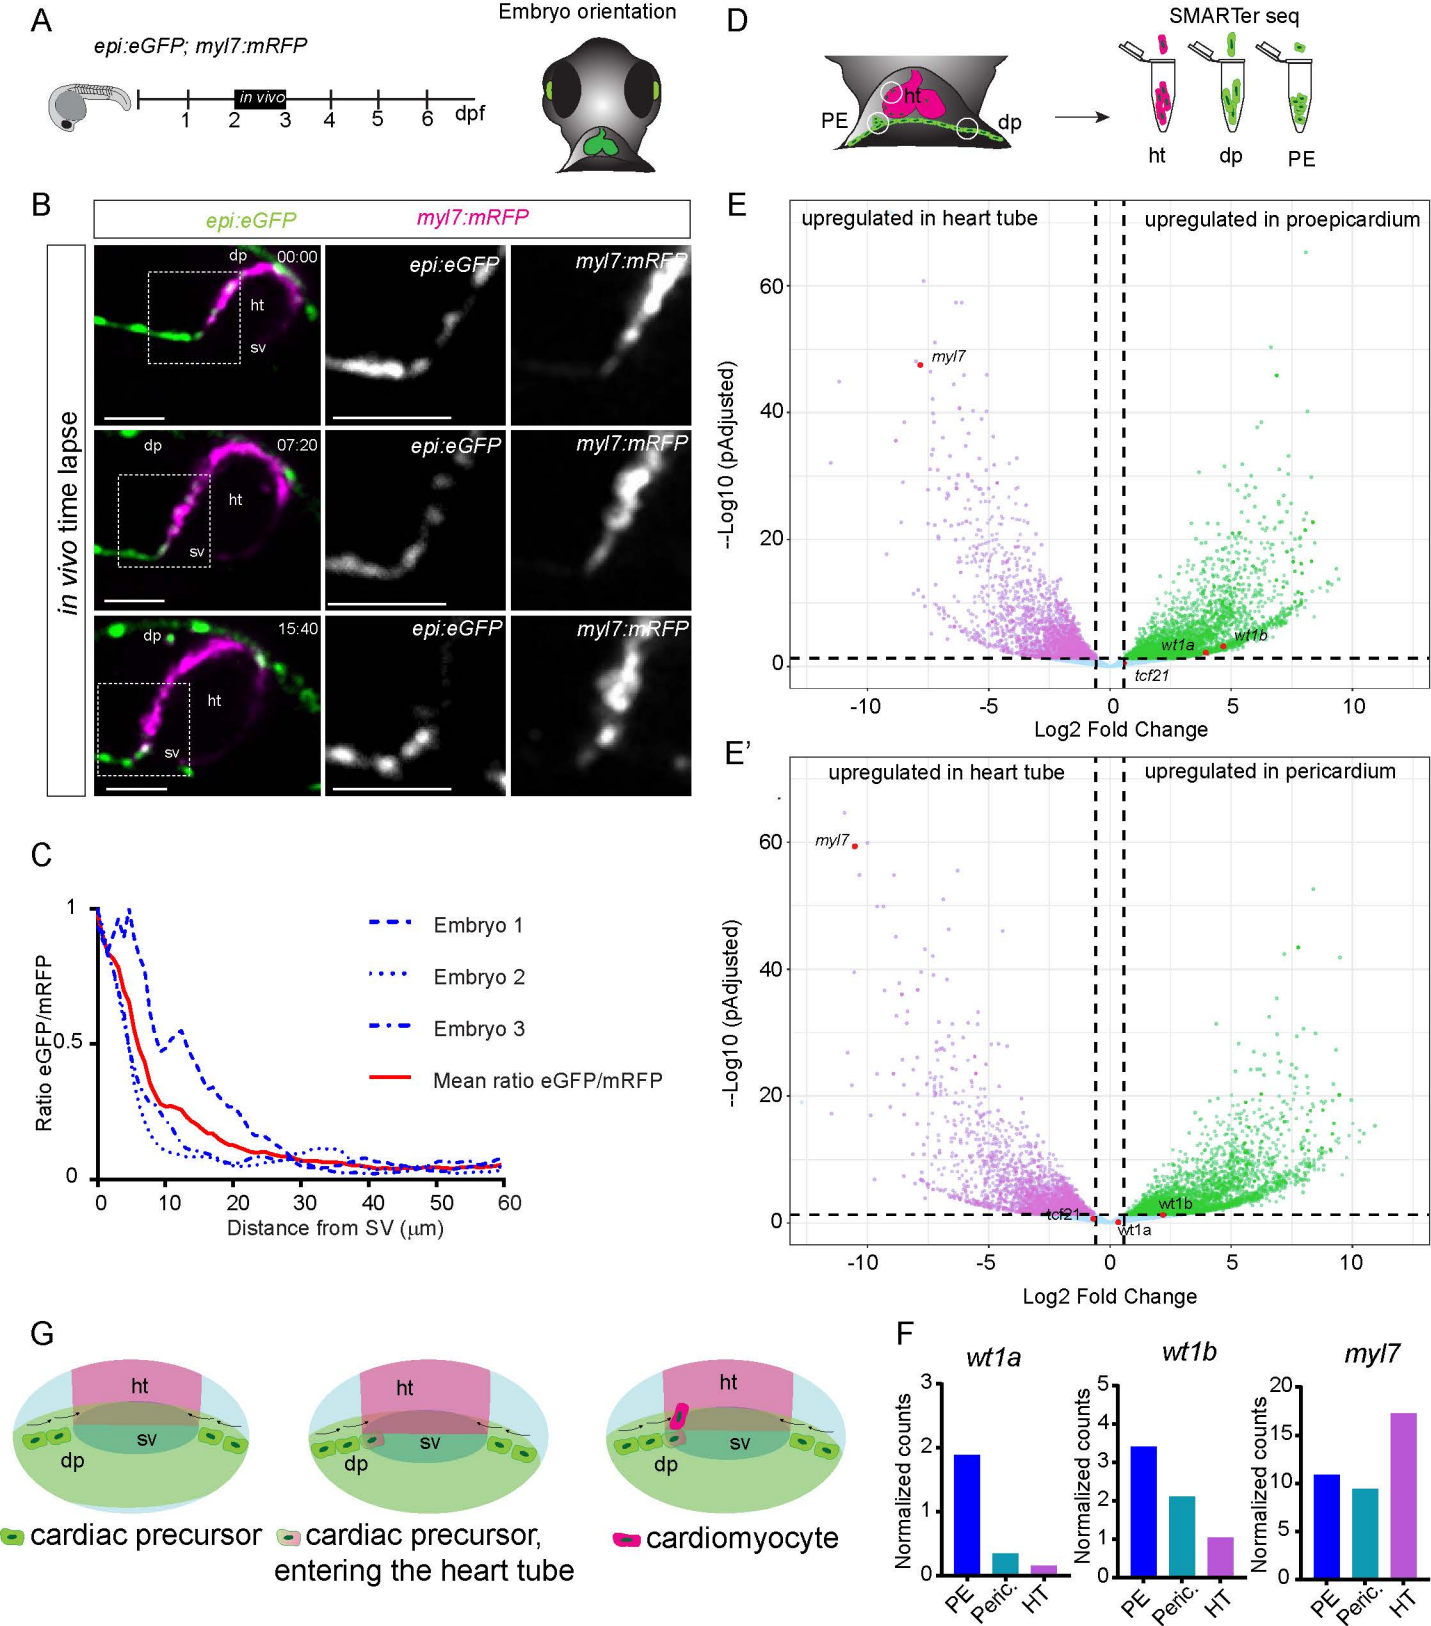

Fig 1

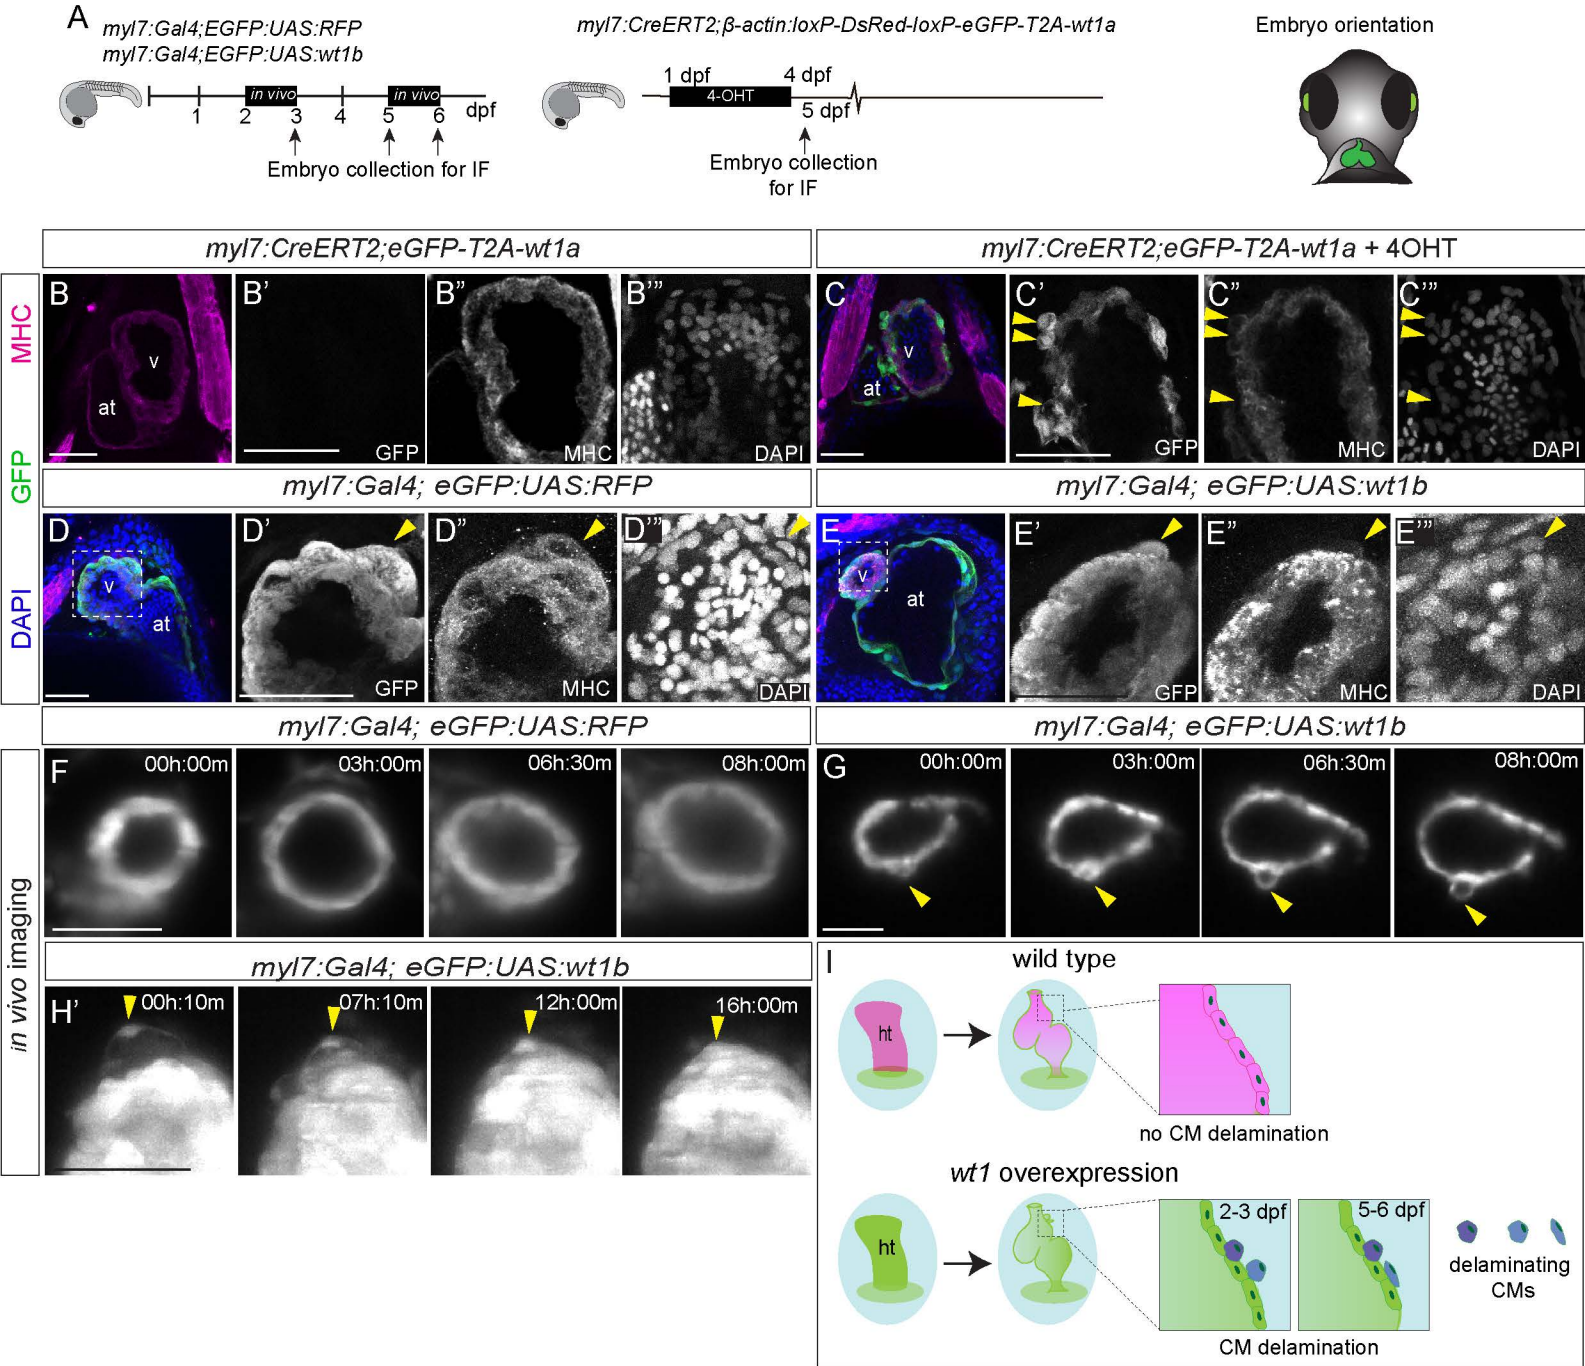

Fig 2



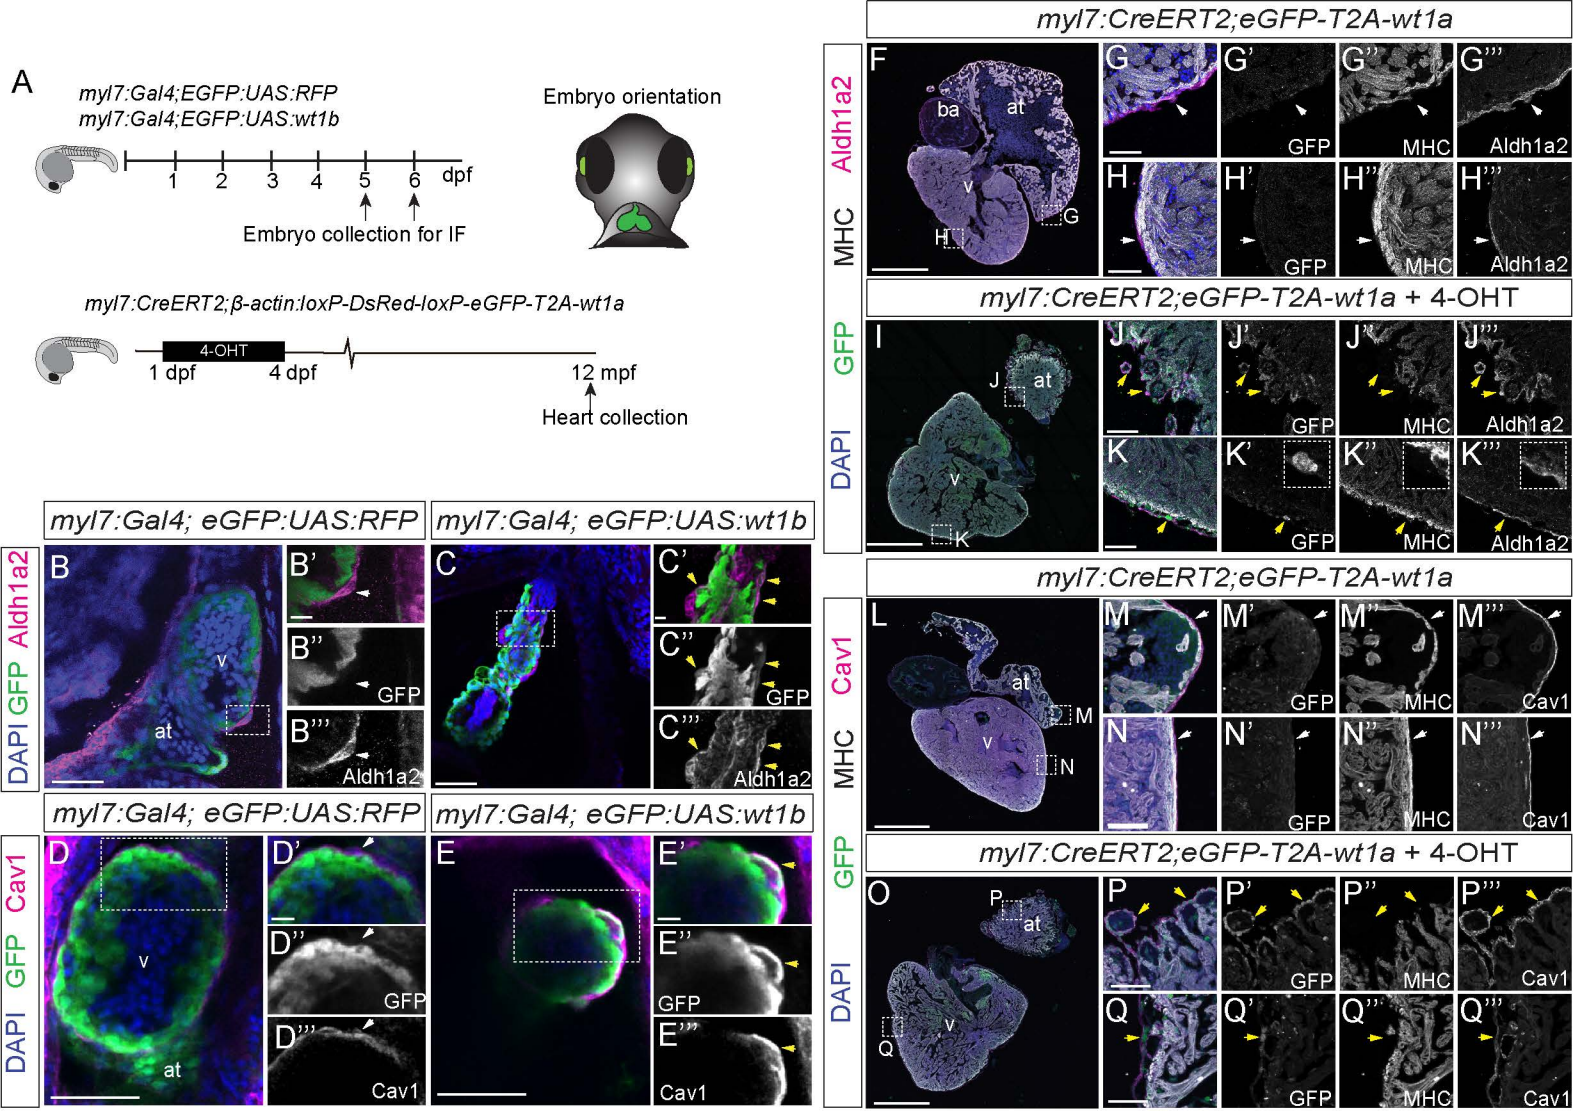

Fig 3



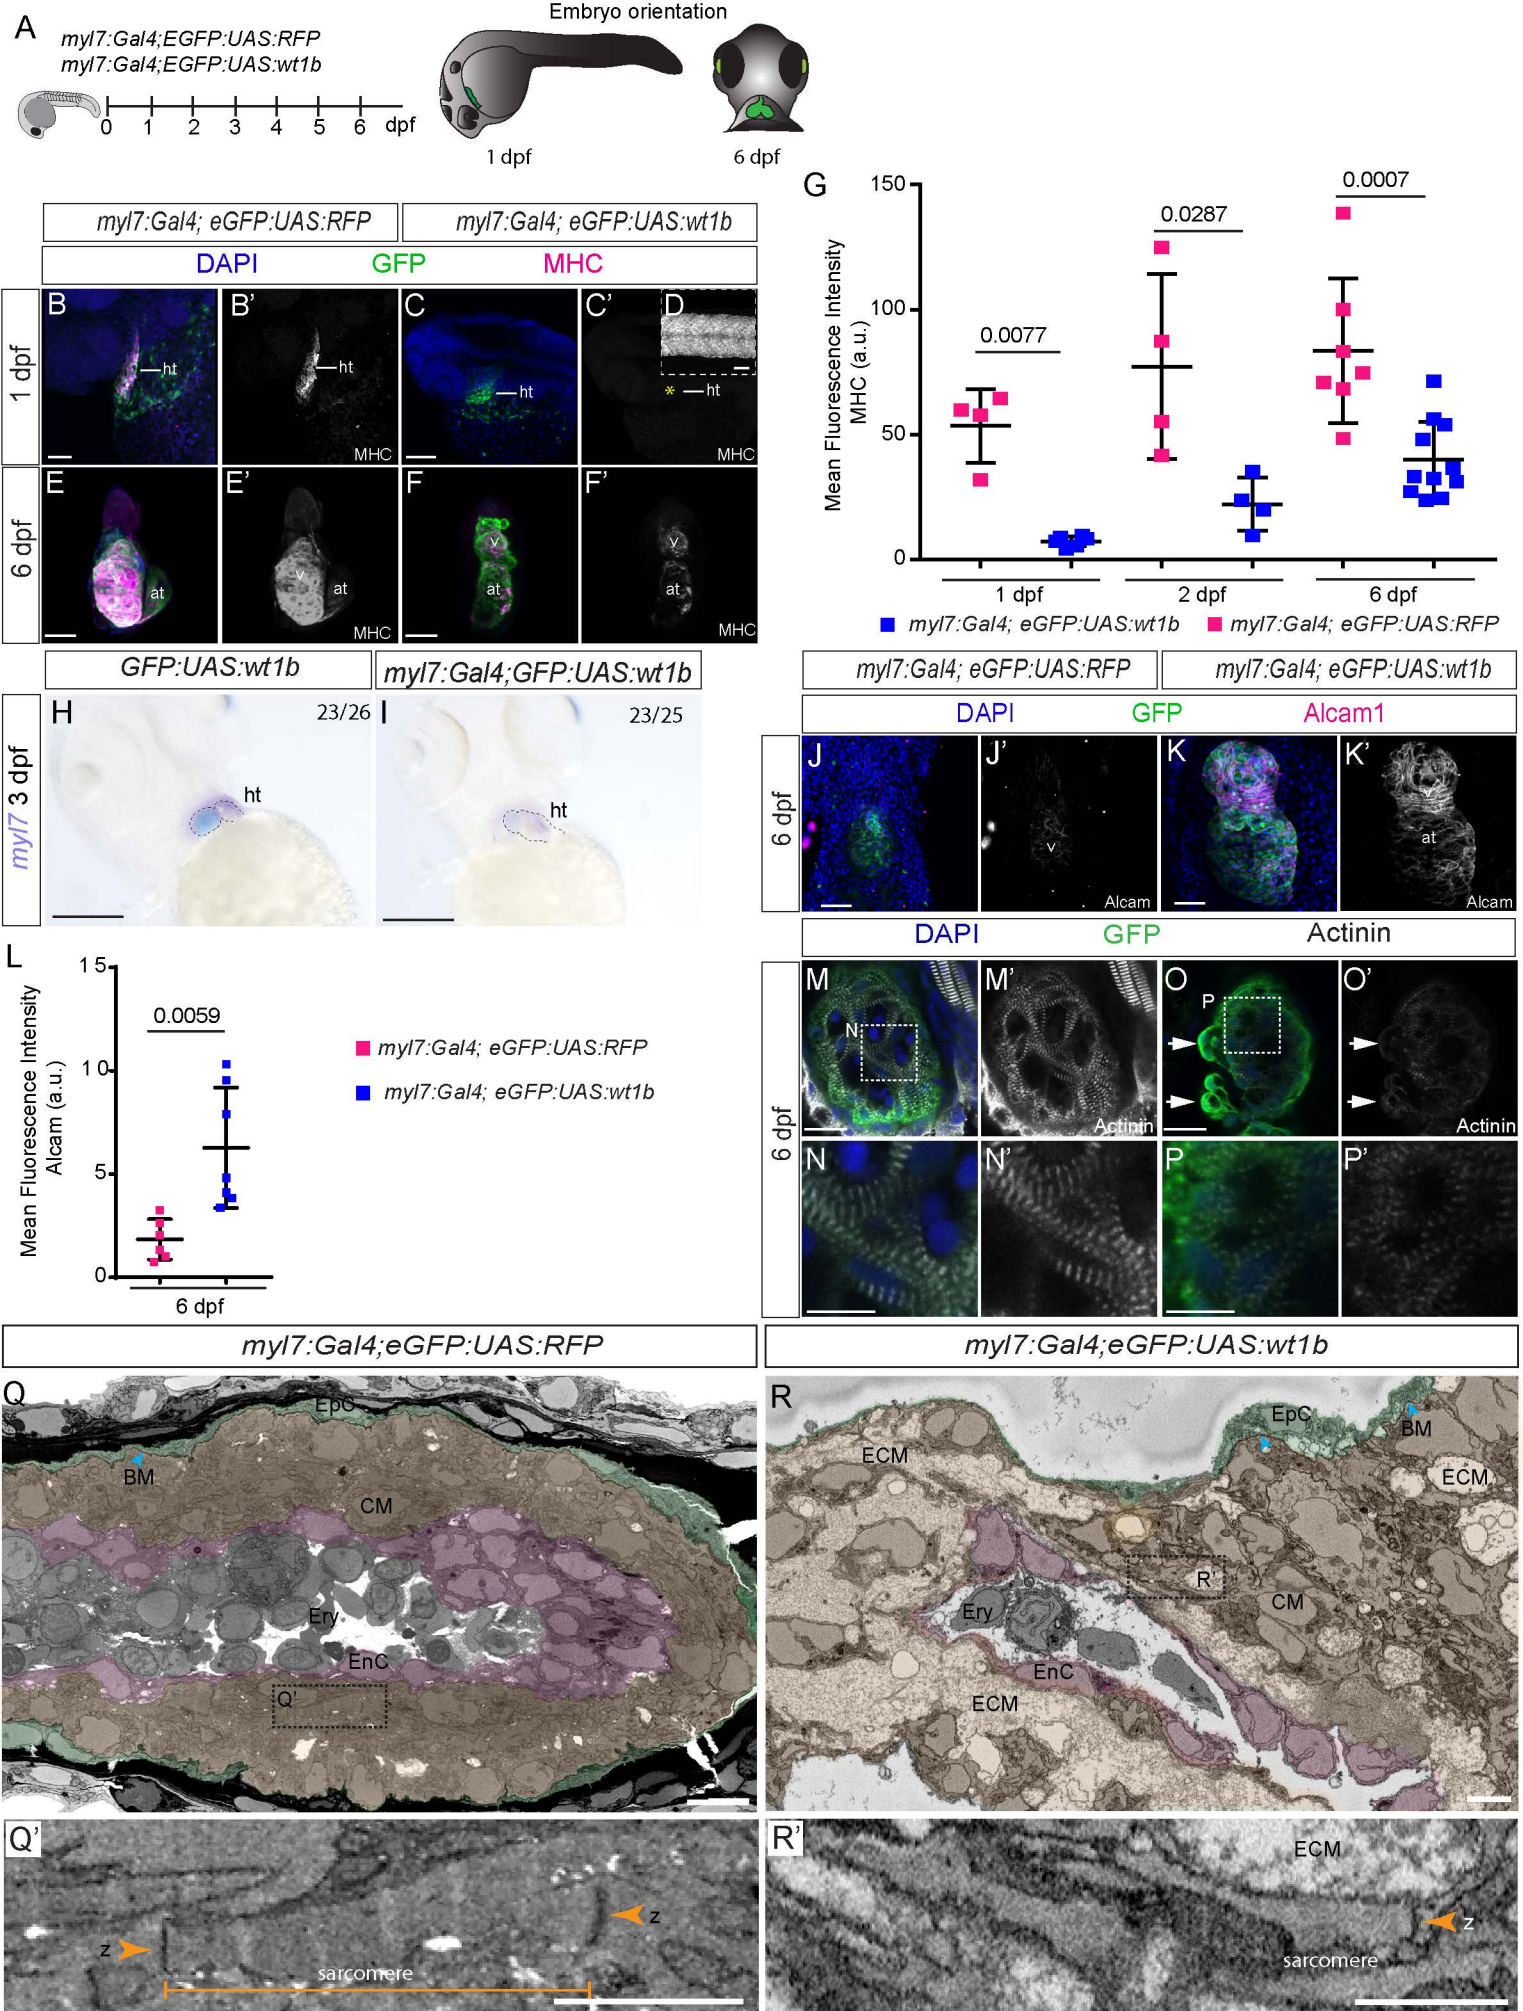

Fig 5

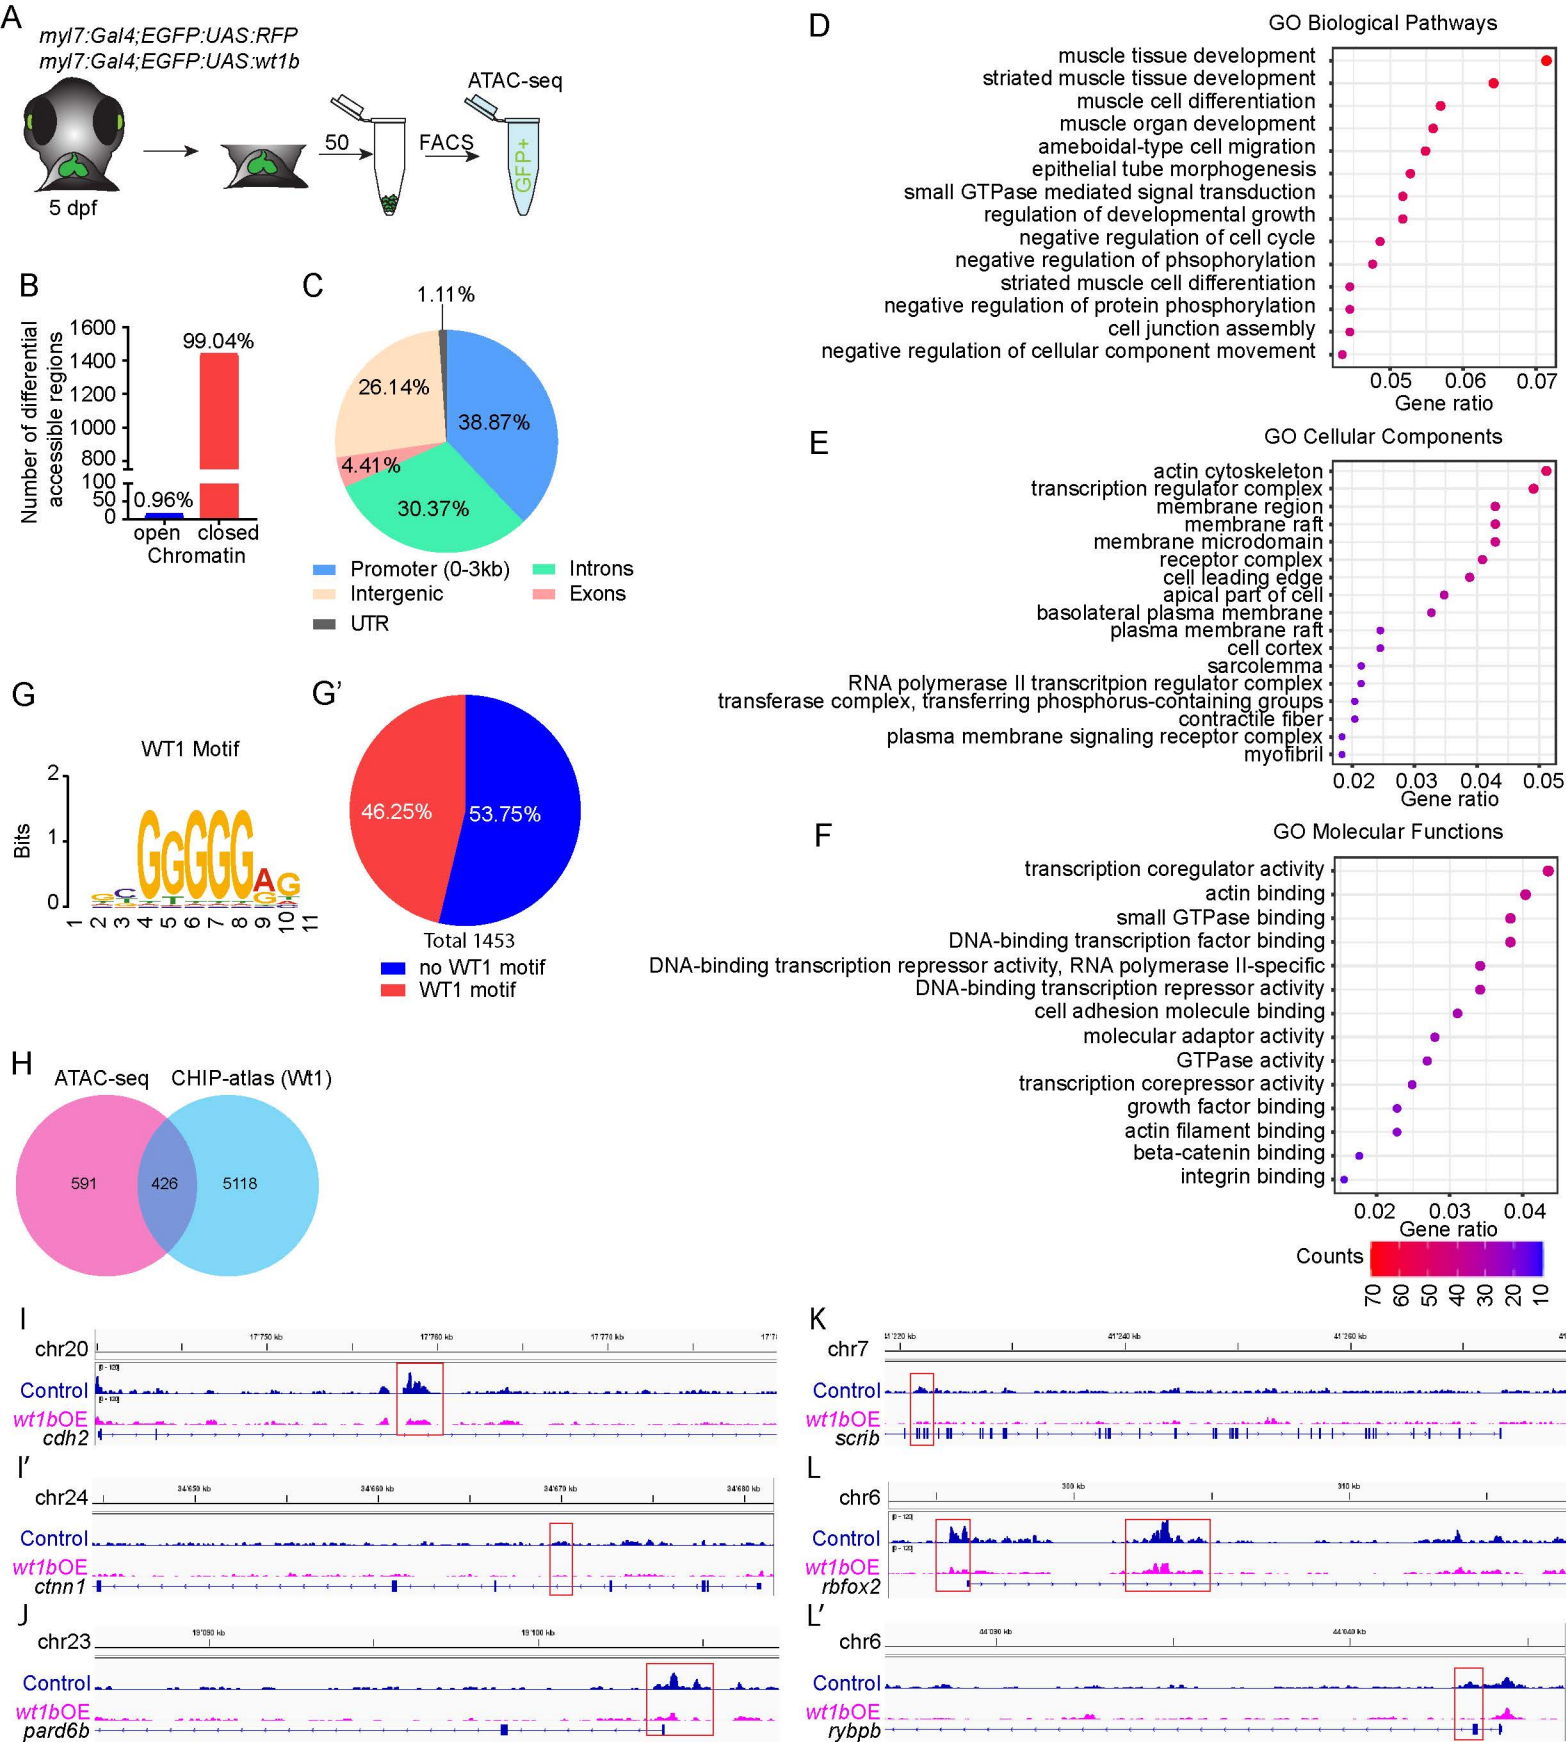

Fig 6

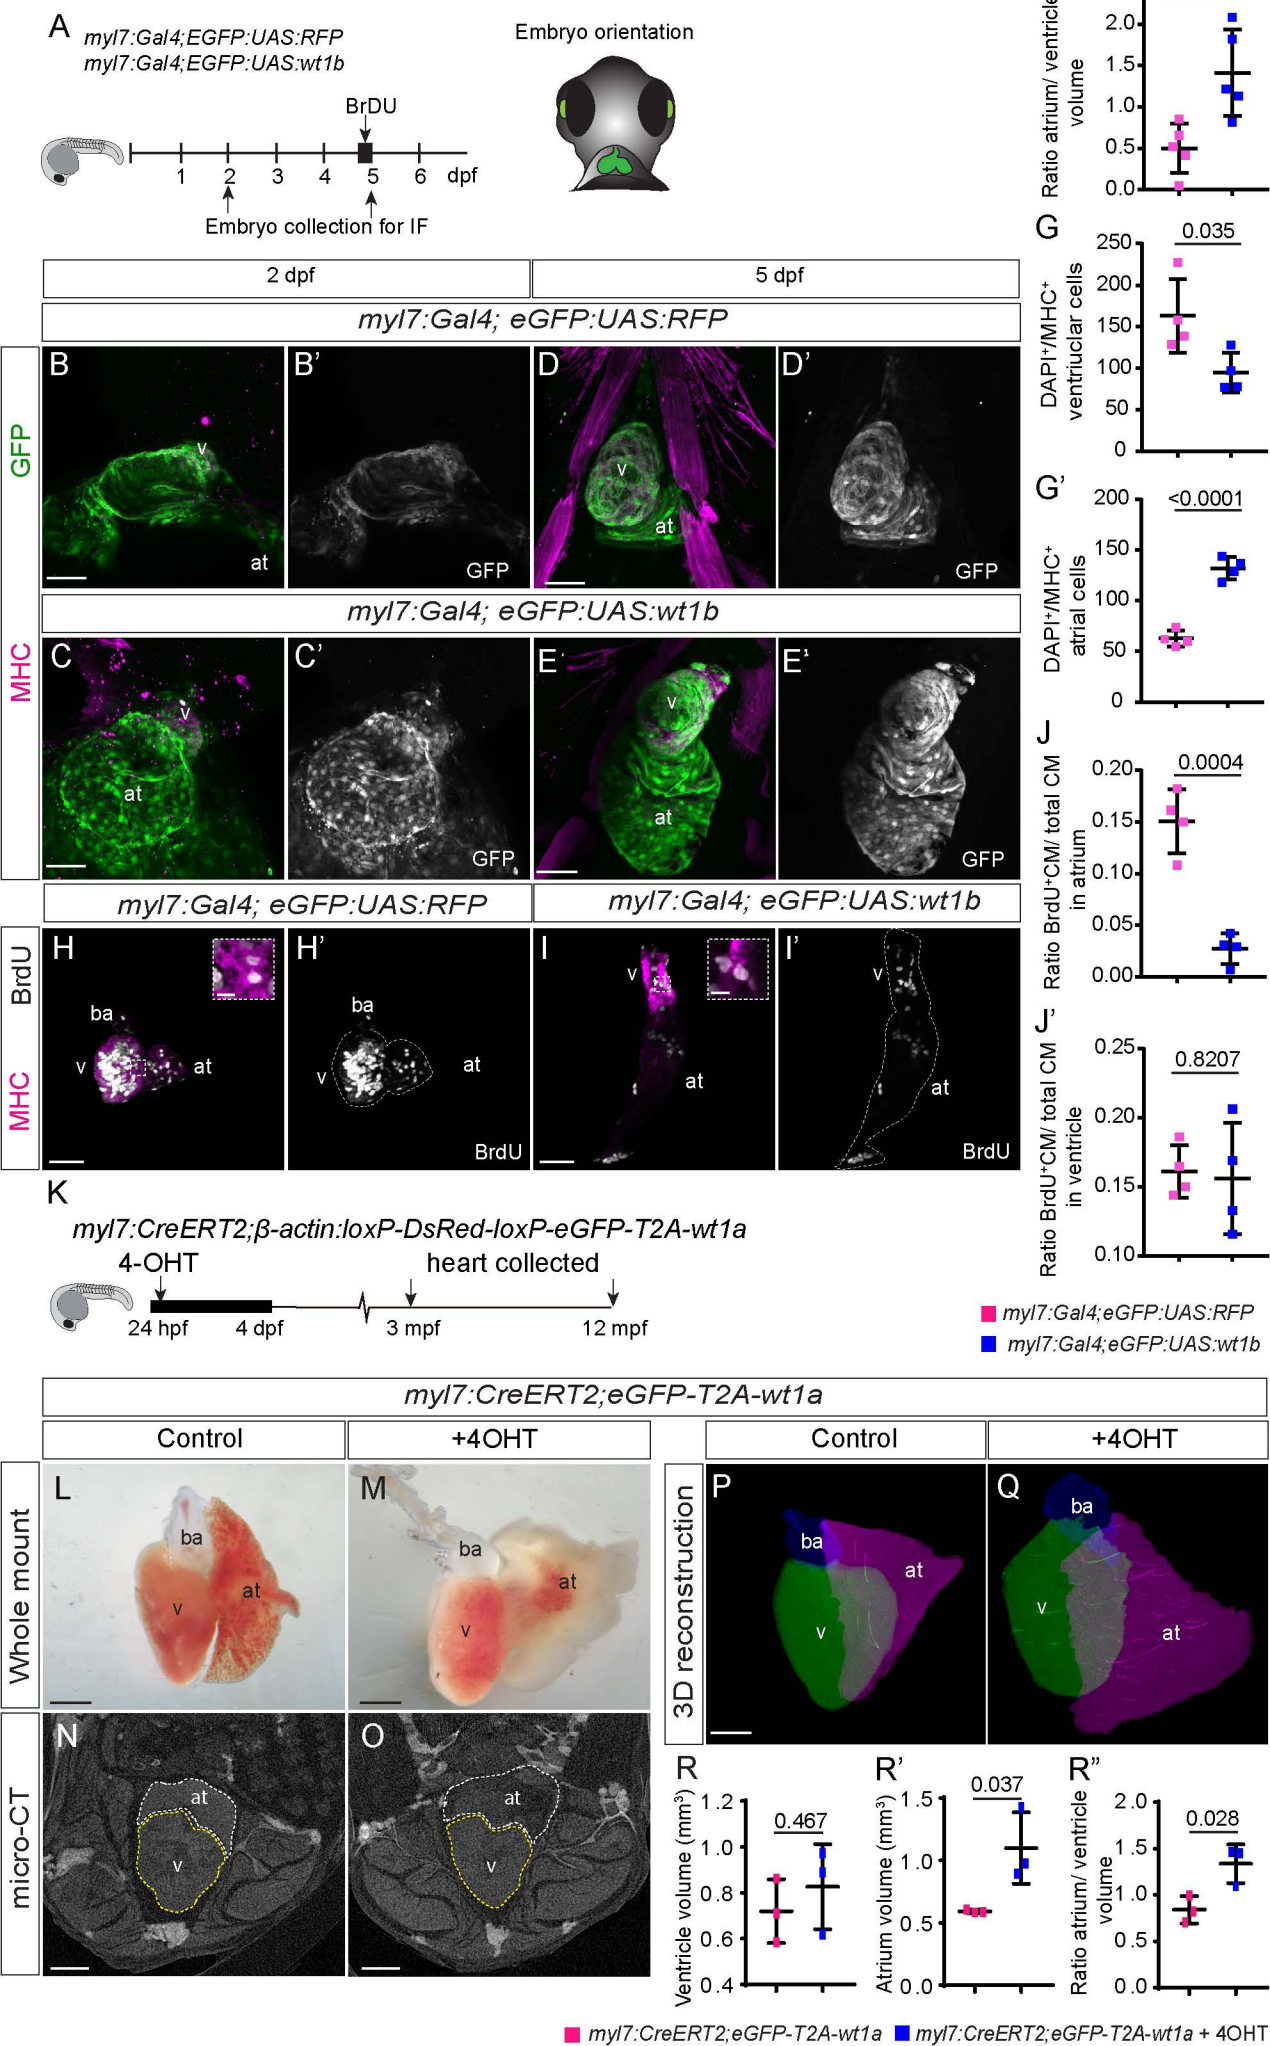

Fig 7

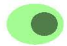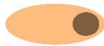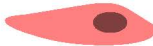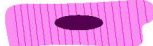

Embryonic Stem  
Cell (mESC)

Mesoderm  
(M)

Cardiac precursor  
(CP)

Cardiomyocyte  
(CM)

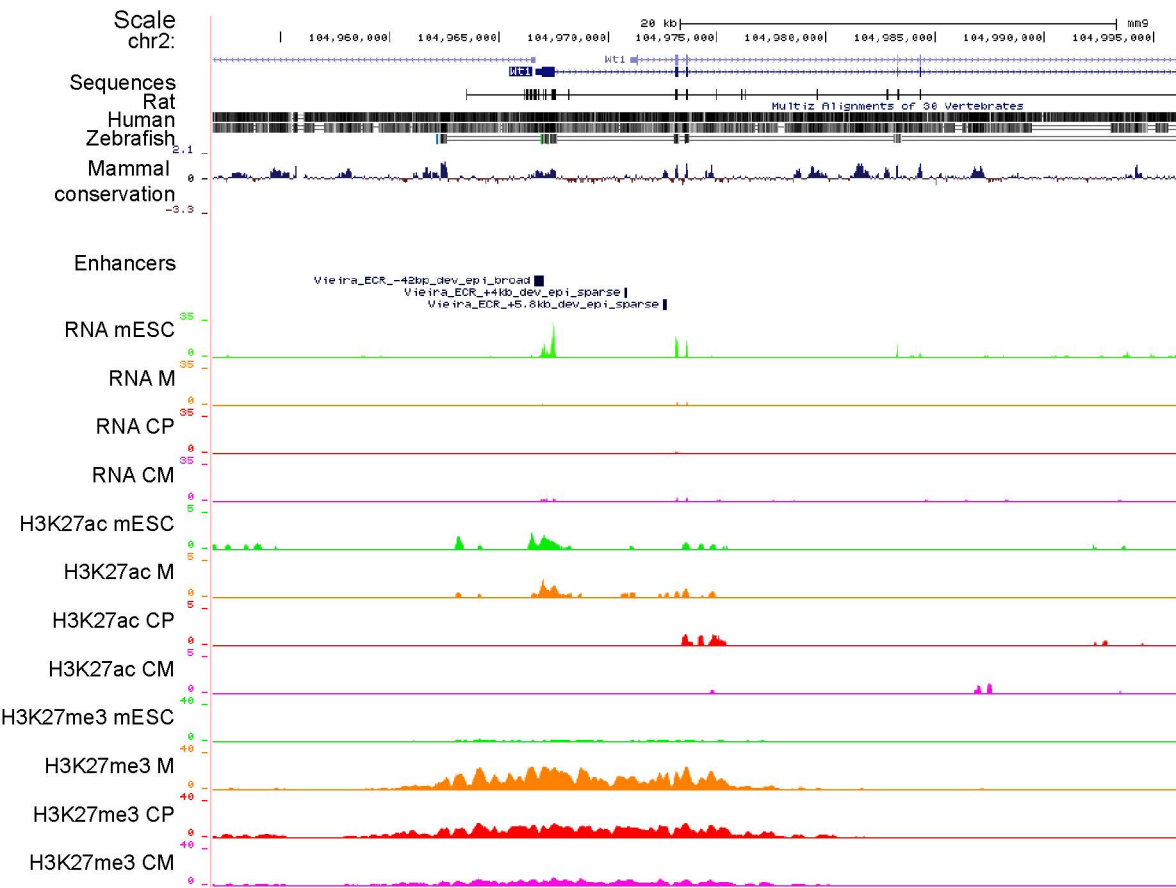

S1 Fig

**A** *myl7:CreERT2;β-actin:loxP-DsRed-loxP-eGFP-T2A-wt1a*

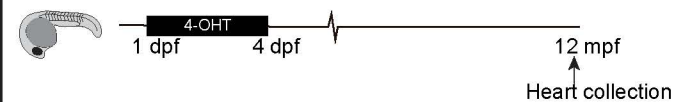

Atrium

Ventricle

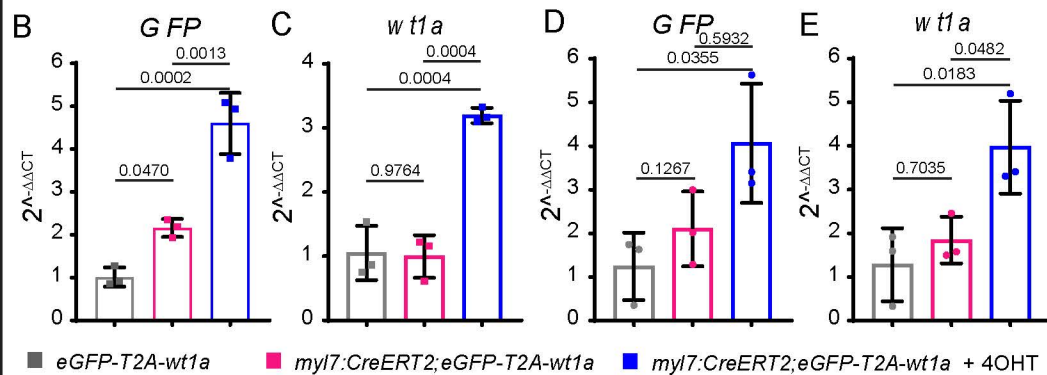

**F** *myl7:Gal4;EGFP:UAS:RFP*  
*myl7:Gal4;EGFP:UAS:wt1b*

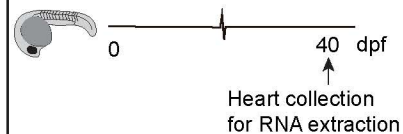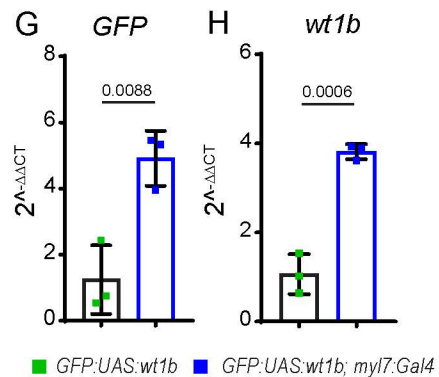

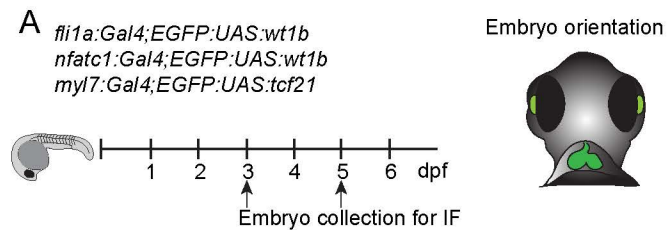

3 dpf

*myl7:Gal4; eGFP:UAS:wt1b*

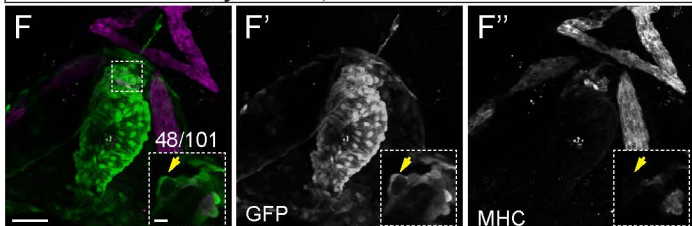

*fli1a:Gal4; eGFP:UAS:wt1b*

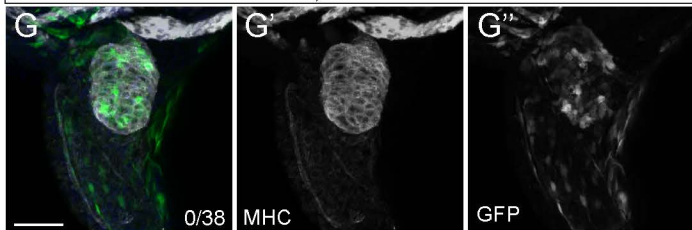

MHC

5 dpf

*myl7:Gal4; eGFP:UAS:wt1b*

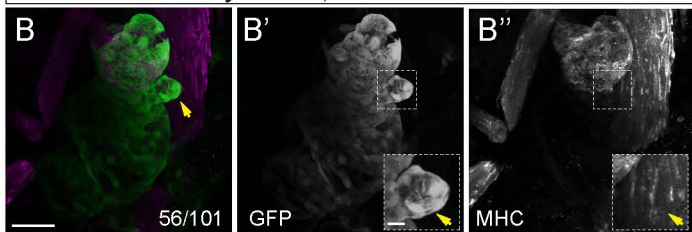

*myl7:Gal4; eGFP:UAS:tcf21*

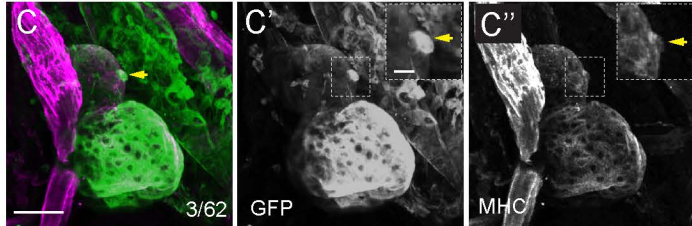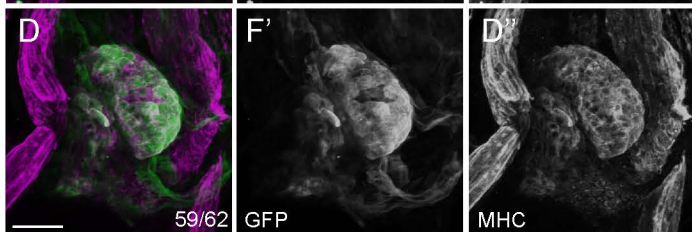

*nfatc1:Gal4; eGFP:UAS:wt1b*

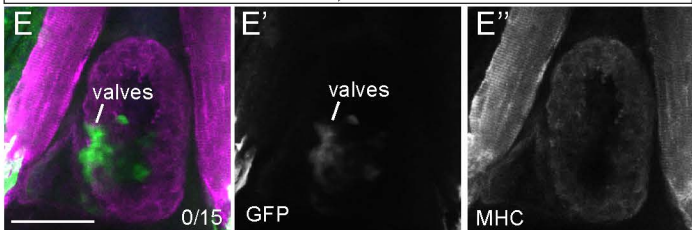

GFP

S3 Fig



**A** *myl7:CreERT2;β-actin:loxP-DsRed-loxP-eGFP-T2A-wt1a*

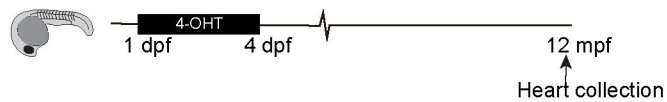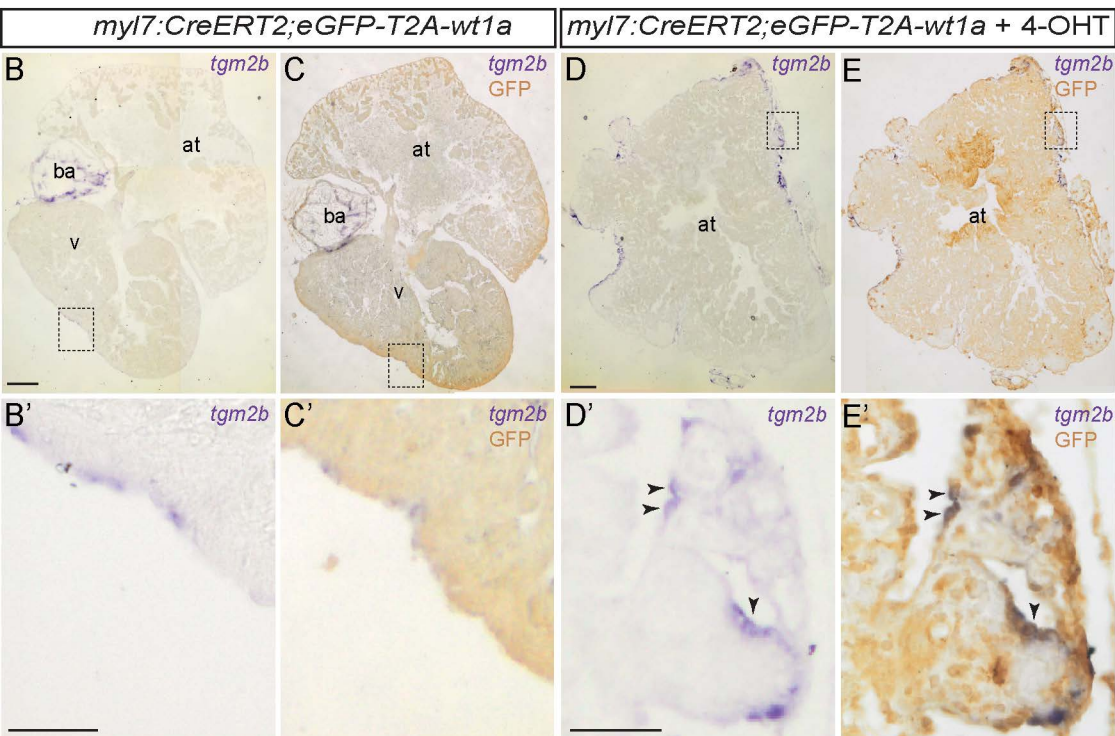

S4 Fig

GO pathways of differential accessible regions for WT1 motif enriched peaks

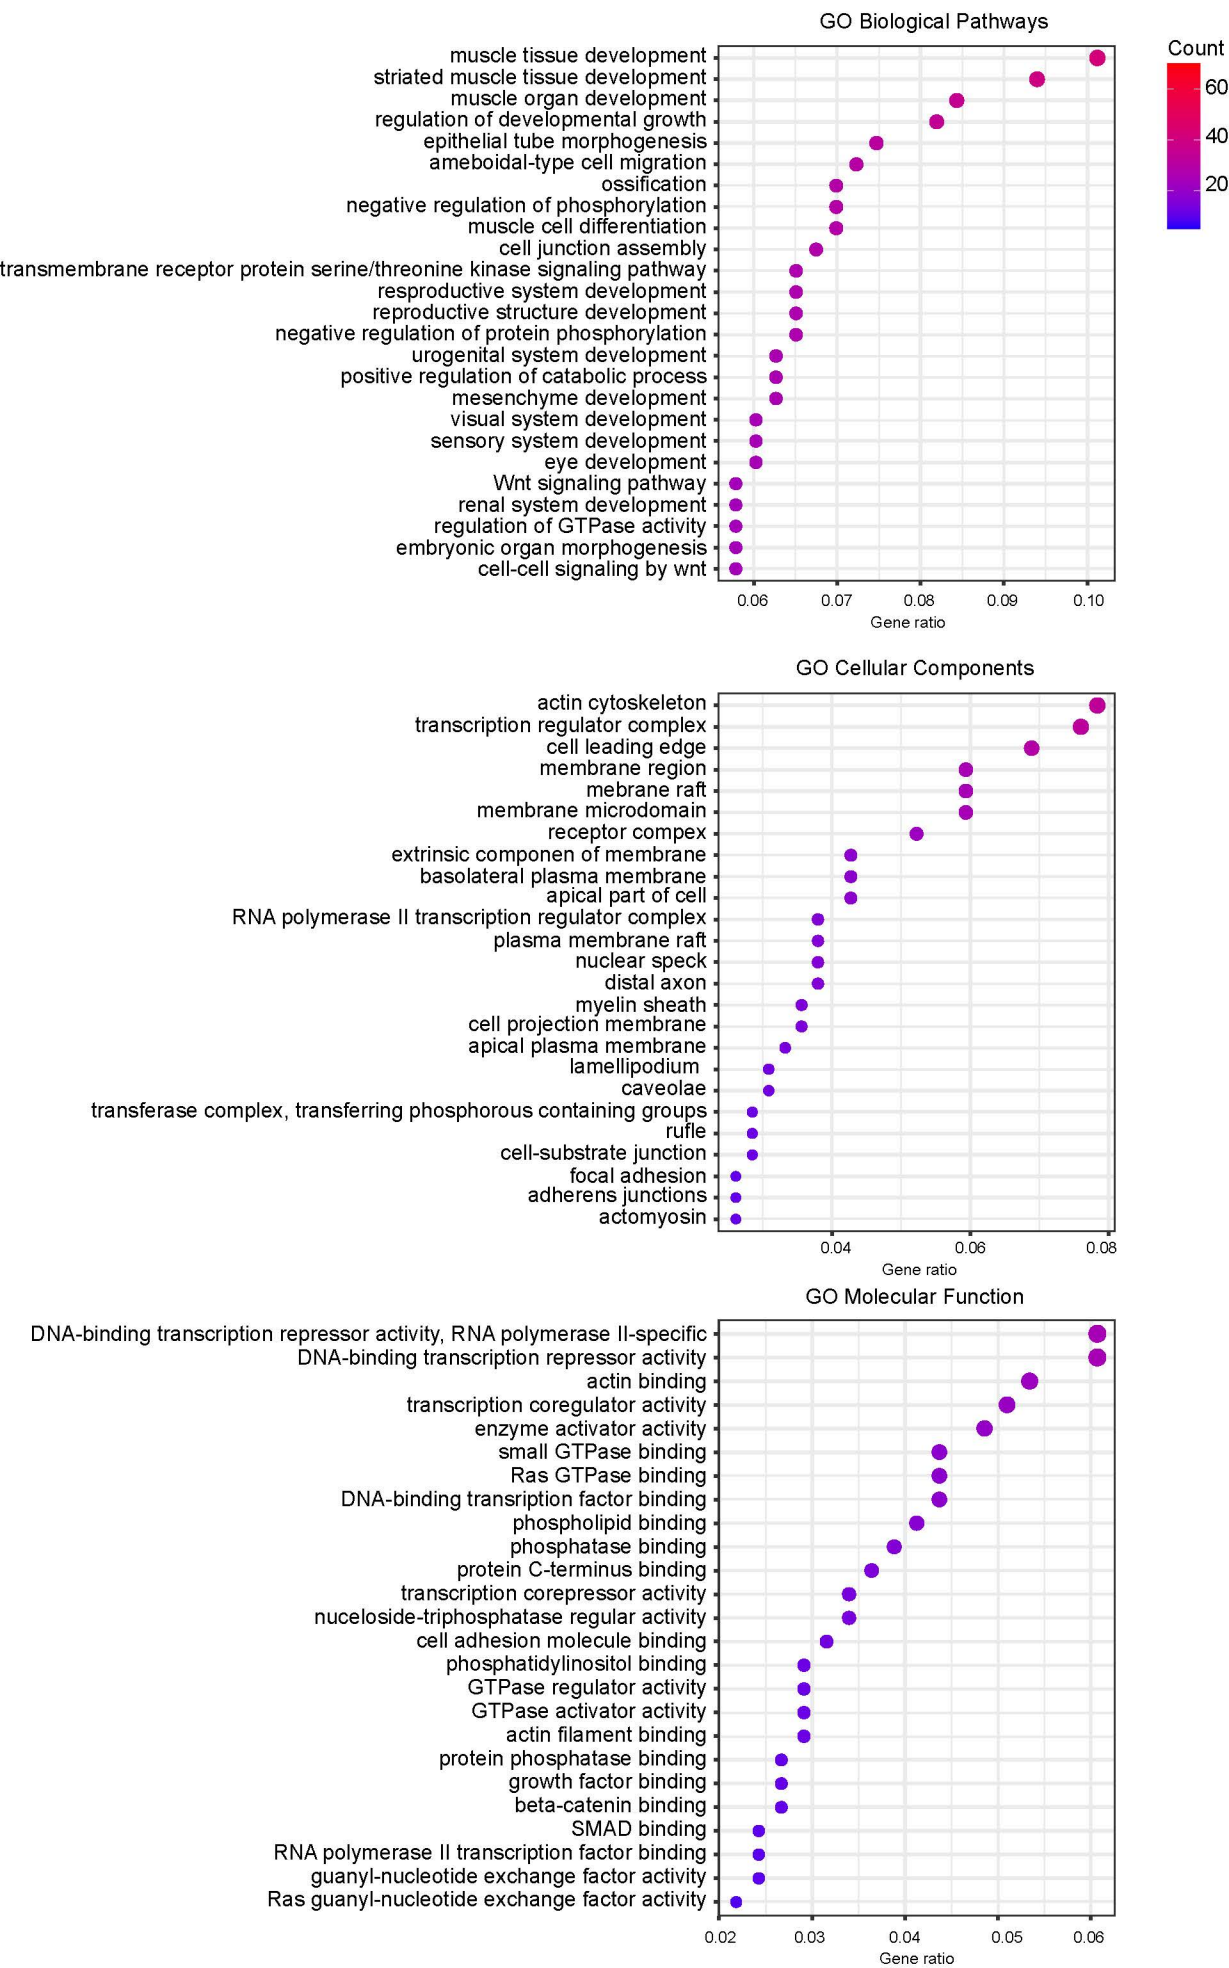

S5 Fig

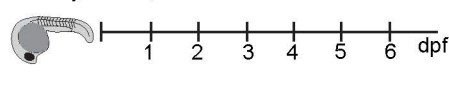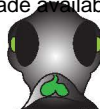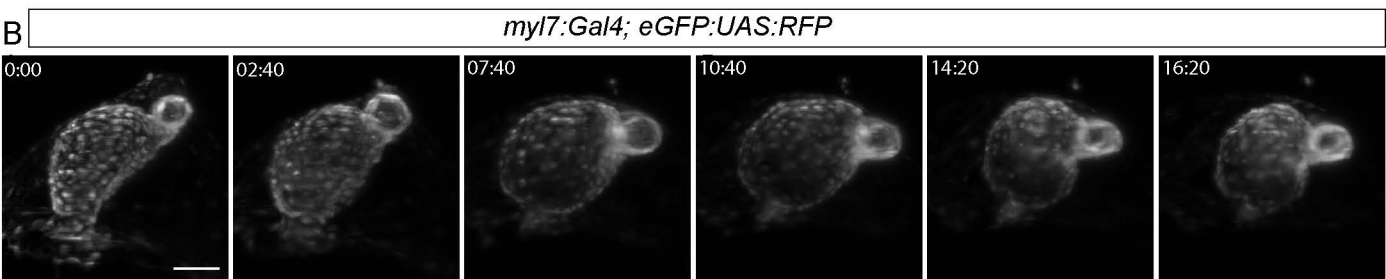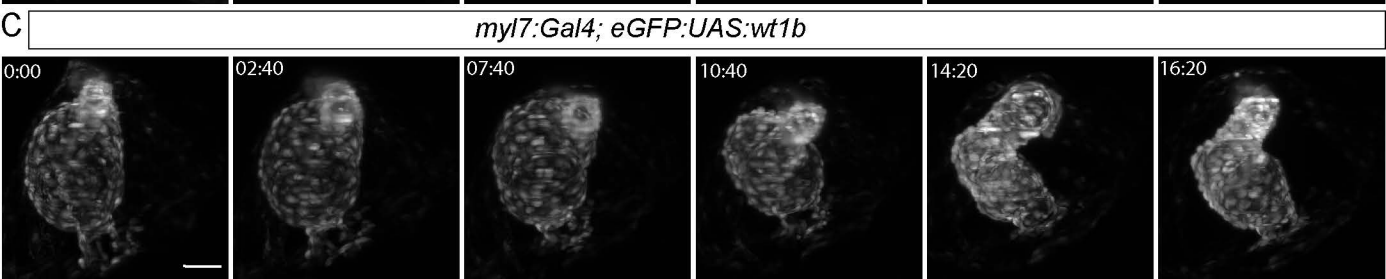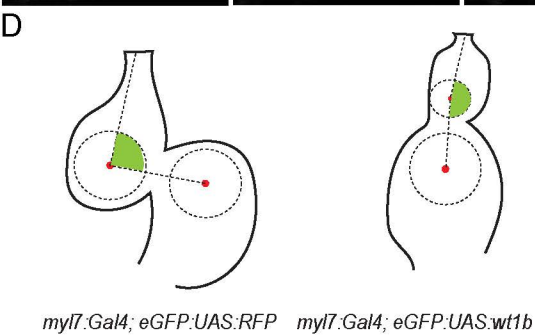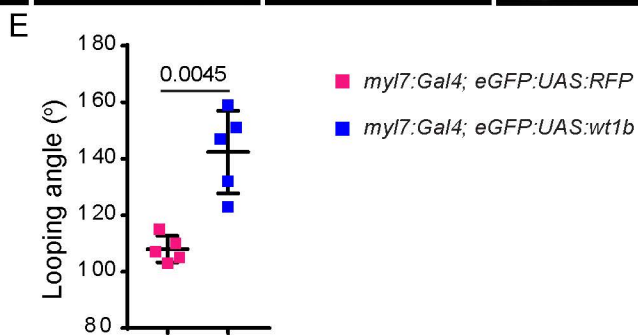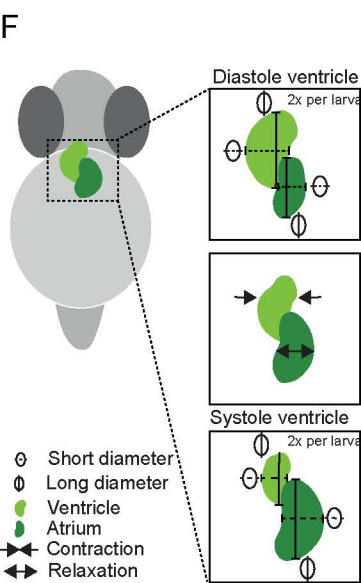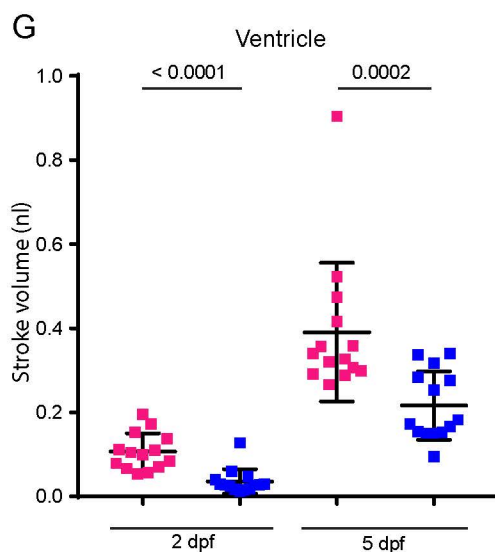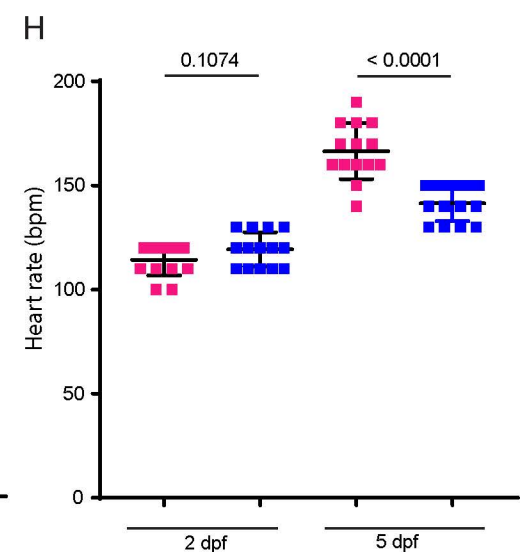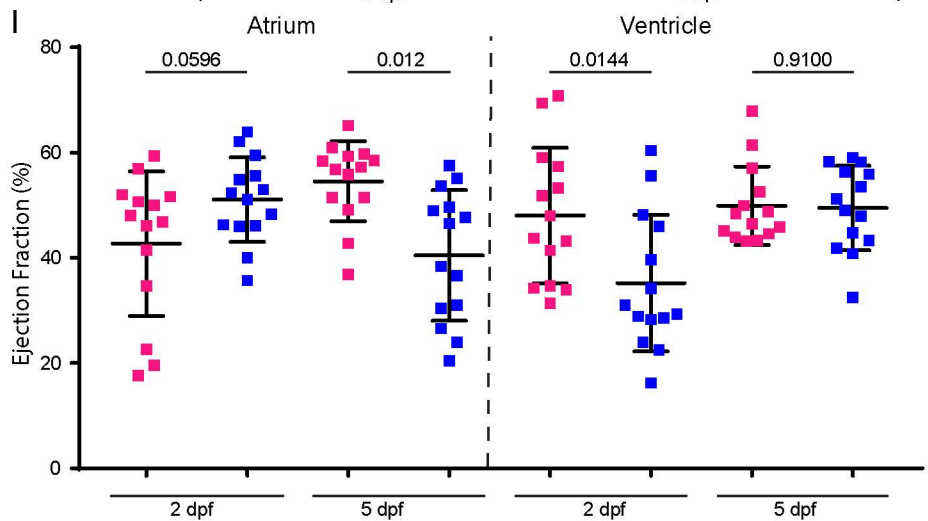

S6 Fig

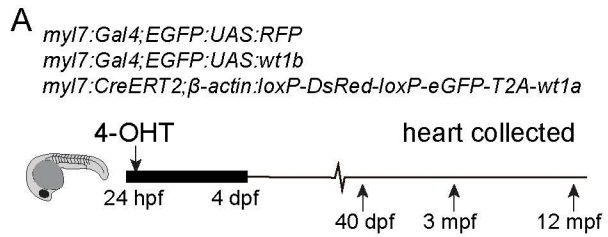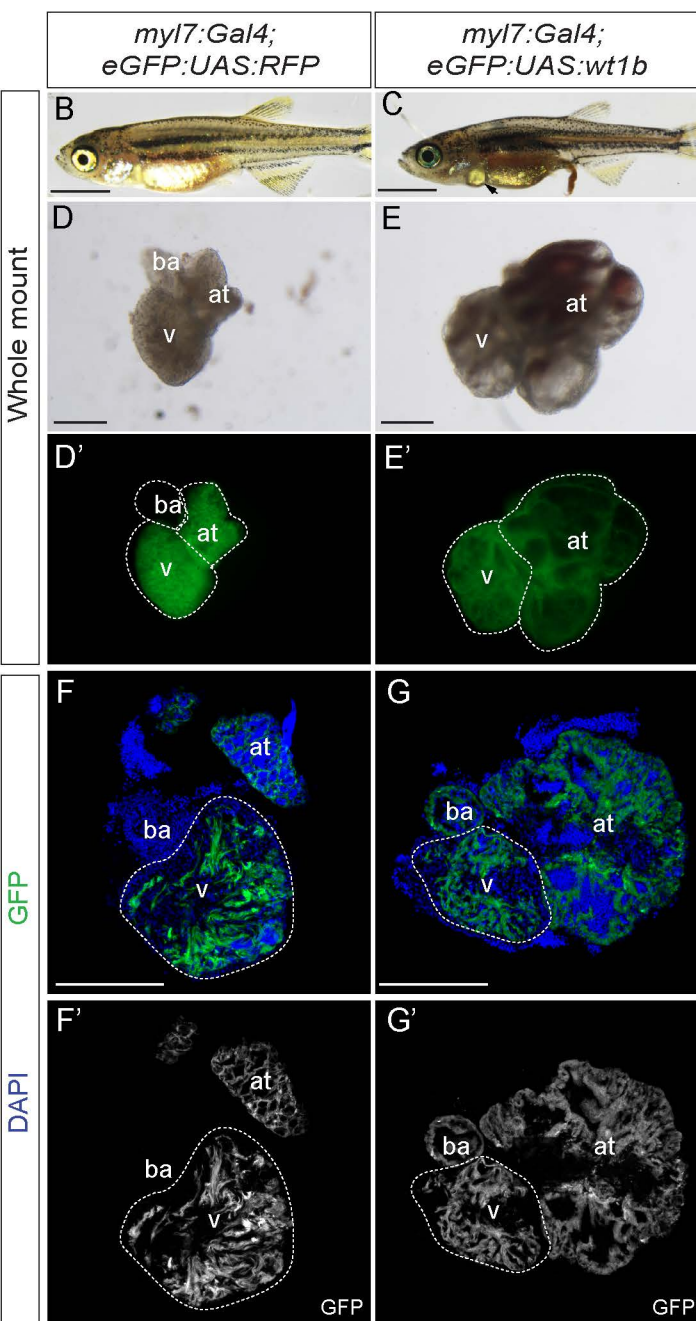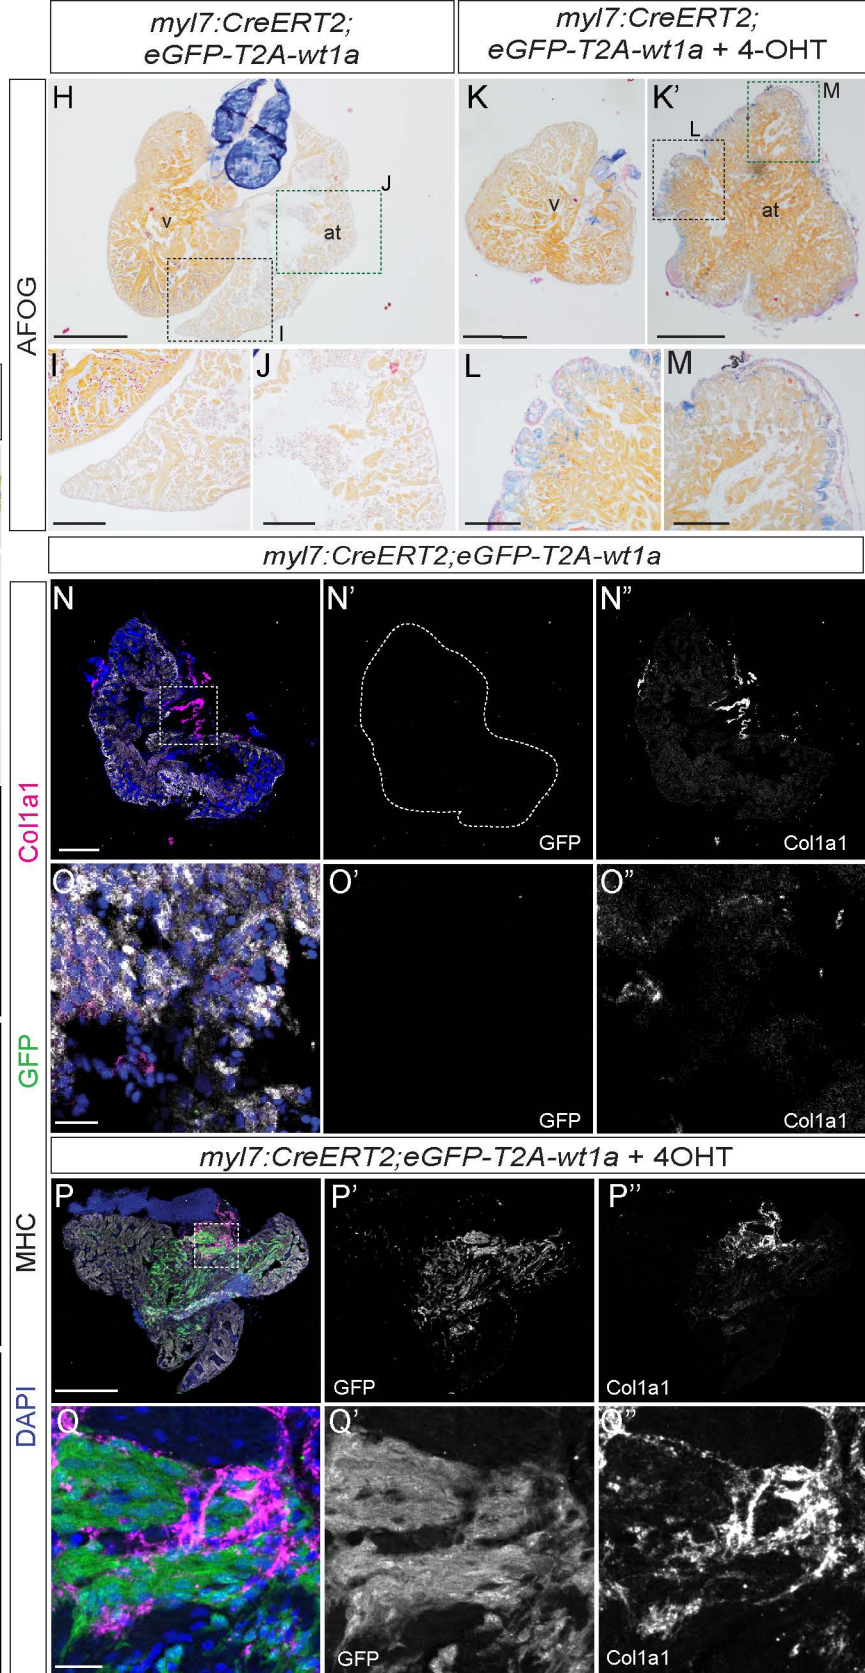

S7 Fig

**S1 Table. Number of cells delaminating from the ventricle in the *wt1a* overexpression and control lines**

| Replicates | Number of delaminating cells              | GFP+ | GFP- |
|------------|-------------------------------------------|------|------|
| Cross 1    | <i>myl7:CreErt2; wt1aOE-rec 1-4dpf-e1</i> | 11   | 0    |
|            | <i>myl7:CreErt2; wt1aOE-rec 1-4dpf-e2</i> | 13   | 0    |
|            | <i>myl7:CreErt2; wt1aOE-rec 1-4dpf-e3</i> | 17   | 0    |
|            | <i>myl7:CreErt2; wt1aOE-rec 1-4dpf-e4</i> | 12   | 0    |
|            | <i>myl7:CreErt2; wt1aOE-ctr-e1</i>        | 0    | 0    |
|            | <i>myl7:CreErt2; wt1aOE-ctr-e2</i>        | 0    | 0    |
|            | <i>myl7:CreErt2; wt1aOE-ctr-e3</i>        | 0    | 0    |
|            | <i>myl7:CreErt2; wt1aOE-ctr-e4</i>        | 0    | 0    |
|            | <i>myl7:CreErt2; wt1aOE-ctr-e5</i>        | 0    | 0    |
|            | <i>myl7:CreErt2; wt1aOE-ctr-e6</i>        | 0    | 0    |
| Cross 2    | <i>myl7:CreErt2; wt1aOE-rec 1-4dpf-e1</i> | 14   | 0    |
|            | <i>myl7:CreErt2; wt1aOE-rec 1-4dpf-e2</i> | 10   | 0    |
|            | <i>myl7:CreErt2; wt1aOE-rec 1-4dpf-e3</i> | 15   | 0    |
|            | <i>myl7:CreErt2; wt1aOE-rec 1-4dpf-e4</i> | 17   | 0    |
|            | <i>myl7:CreErt2; wt1aOE-rec 1-4dpf-e5</i> | 15   | 0    |
|            | <i>myl7:CreErt2; wt1aOE-rec 1-4dpf-e6</i> | 12   | 0    |
|            | <i>myl7:CreErt2; wt1aOE-ctr-e1</i>        | 2    | 0    |
|            | <i>myl7:CreErt2; wt1aOE-ctr-e2</i>        | 0    | 0    |
|            | <i>myl7:CreErt2; wt1aOE-ctr-e3</i>        | 0    | 0    |
|            | <i>myl7:CreErt2; wt1aOE-ctr-e4</i>        | 0    | 0    |

**S2 Table. Number of animals with heart malformations in *wt1b* overexpression and control lines**

| Line Name                       | Replicates | GFP expression<br><i>Tg/Tg</i> |                 |                   |       |       | No GFP expression<br>sibling |                 |                   |       |       |
|---------------------------------|------------|--------------------------------|-----------------|-------------------|-------|-------|------------------------------|-----------------|-------------------|-------|-------|
|                                 |            | Normal Heart                   | Enlarged Atrium | Incorrect looping | Edema | Total | Normal Heart                 | Enlarged Atrium | Incorrect looping | Edema | Total |
| <i>myl7:Gal4; eGFP:UAS:wt1b</i> | Cross 1    | 26                             | 18              | 18                | 18    | 44    | 135                          | 0               | 0                 | 2     | 137   |
|                                 | Cross 2    | 18                             | 20              | 20                | 20    | 38    | 121                          | 0               | 1                 | 1     | 122   |
|                                 | Cross 3    | 2                              | 24              | 26                | 26    | 28    | 97                           | 0               | 0                 | 1     | 98    |
|                                 | Cross 4    | 25                             | 79              | 79                | 79    | 104   | 249                          | 3               | 4                 | 7     | 256   |
|                                 | Cross 5    | 6                              | 41              | 37                | 38    | 47    | 146                          | 0               | 0                 | 6     | 152   |
|                                 | Cross 6    | 9                              | 51              | 51                | 51    | 60    | 157                          | 0               | 0                 | 0     | 157   |
| <i>myl7:Gal4; eGFP:UAS:RFP</i>  | Cross 1    | 8                              | 1               | 1                 | 1     | 9     | 53                           | 0               | 0                 | 1     | 54    |
|                                 | Cross 2    | 23                             | 3               | 2                 | 3     | 26    | 118                          | 2               | 0                 | 7     | 125   |
|                                 | Cross 3    | 10                             | 4               | 2                 | 4     | 14    | 46                           | 0               | 2                 | 4     | 50    |

**S3 Table. Imaging settings: Parameters at Leica DLS for long term or high-resolution acquisition**

| Parameter                             | Long term imaging (Fig. )                       |
|---------------------------------------|-------------------------------------------------|
| Objective lens detection/illumination | 25 x, NA 0.95 water immersion<br>2.5 x, NA 0.07 |
| Acquisition mode                      | XYTZL                                           |
| Channel acquisition                   | Sequential, channels then stack                 |
| XY format                             | 512 x 512 (4 x 4 binning)                       |
| Exposure time, frame interval         | 4.8 ms / 18.9 ms                                |
| T, number of frames                   | 50                                              |
| Z, optical slice interval             | 2.5 $\mu$ m                                     |
| L, repeated acquisition               | 99 Loops in 10 min intervals                    |
| Channel 1 laser intensity             | 8% 488 nm                                       |
